# Supplementary material
Source: bioRxiv or medRxiv preprint supplement (https://www.biorxiv.org/highwire/filestream/108741/field_highwire_adjunct_files/0/359513-1.pdf)
Supplement: Supplementary file [file 359513-1.pdf]

# Supplemental Materials

## Methods

### Transgenic mice

All animal procedures were approved by the Institutional Animal Care and Use Committee (IACUC) at the Allen Institute for Brain Science. Transgenic mouse lines were generated using conventional and BAC transgenic, or knock-in strategies as previously described<sup>1,2</sup>. External sources included Cre lines generated as part of the NIH Neuroscience Blueprint Cre Driver Network (<http://www.credrivermice.org>) and the GENSAT project (<http://gensat.org/>), as well as individual labs. In transgenic lines with regulatable versions of Cre young adult tamoxifen-inducible mice (CreERT2) were treated with ~200 µl of tamoxifen solution (0.2 mg/g body weight) via oral gavage once per day for 5 consecutive days to activate Cre recombinase.

We used the transgenic mouse line Ai93, in which GCaMP6f expression is dependent on the activity of both Cre recombinase and the tetracycline controlled transactivator protein (tTA)<sup>1</sup>. Triple transgenic mice (Ai93, tTA, Cre) were generated by first crossing Ai93 mice with Camk2a-tTA mice, which preferentially express tTA in forebrain excitatory neurons<sup>3</sup>. Double transgenic mice were then crossed with a Cre driver line to generate mice in which GCaMP6f expression is induced in the specific populations of neurons that express both Cre and tTA. In a subset of mice, we alternatively leveraged the TIGRE2.0 transgenic platform that combines the expression of tTA and Gcamp6f in a single reporter line (Ai148(TIT2L-GC6f-ICL-tTA2)<sup>4</sup>.

Cux2-CreERT2;Camk2a-tTA;Ai93(TITL-GCaMP6f) expression is regulated by the tamoxifen-inducible Cux2 promoter, induction of which results in Cre-mediated expression of GCaMP6f predominantly in superficial cortical layers 2, 3 and 4<sup>5</sup> (see Supplemental Figure 7). Both Emx1-IRES-Cre;Camk2a-tTA;Ai93 and Slc17a7-IRES2-Cre;Camk2a-tTA;Ai93 are pan-excitatory lines and show expression throughout all cortical layers<sup>6,7</sup>. SST-IRES-Cre;Ai148 exhibit GCaMP6f in somatostatin-expressing neurons<sup>8</sup>. VIP-IRES-Cre; Ai148 exhibit GCaMP6f in *Vip*-expressing cells by the endogenous promoter/enhancer elements of the vasoactive intestinal polypeptide locus<sup>8</sup>. Rorb-IRES2-Cre;Cam2a-tTA;Ai93 exhibit GCaMP6f in excitatory neurons in cortical layer 4 (dense patches) and layers 5,6 (sparse)<sup>6</sup>. Scnn1a-Tg3-Cre;Camk2a-tTA;Ai93 exhibit GCaMP6f in excitatory neurons in cortical layer 4 and in restricted areas within the cortex, in particular primary sensory cortices. Nr5a1-Cre;Camk2a-tTA;Ai93 exhibit GCaMP6f in excitatory neurons in cortical layer 4<sup>9</sup>. Rbp4-Cre;Camk2a-tTA;Ai93 exhibit GCaMP6f in excitatory neurons in cortical layer 5<sup>10</sup>. Fezf2-CreER;Ai148 exhibits GCaMP6f in subcerebral projection neurons in the layer 5 and 6<sup>11</sup>. Tlx3-Cre\_PL56;Ai148 exhibits GCaMP6f primarily restricted to IT corticostriatal in the layer 5<sup>10</sup>. Ntsr1-Cre\_GN220;Ai148 exhibit GCaMP6f in excitatory corticothalamic neurons in cortical layer 6<sup>12</sup>.

40 We maintained all mice on a reverse 12-hour light cycle following surgery and  
41 throughout the duration of the experiment and performed all experiments during the dark  
42 cycle.

43

#### 44 **Cross platform registration**

45 We developed an integrated suite of tools and procedures that leveraged surgical  
46 implant hardware, mouse behavior platforms, and imaging instruments. These tools  
47 provided a means to register data acquired between instruments and repeatedly target  
48 and record neurons in brain areas identified with intrinsic imaging. (1) Each animal was  
49 implanted with a stereotaxically-aligned headframe that provided a cranial window for  
50 brain imaging and permitted head fixation in a reproducible configuration (see *Surgery*).  
51 (2) All behavioral hardware components were custom-designed and assembled in house  
52 so that we could register the underlying geometry to a common coordinate system (see  
53 *Intrinsic Imaging, Two photon in vivo calcium imaging and Supplementary Figure 1a*). (3)  
54 All imaging datasets were registered to this common coordinate system using shared  
55 reticles clamped throughout the data collection pipeline (Supplementary Figure 1b). We  
56 maintained this coordinate system by monitoring the stability of the reticles on a weekly  
57 basis across all steps of the data collection pipeline. Any excessive deviations were  
58 flagged for further inspection (Supplementary Figure 1c). (4) We converted locations from  
59 the intrinsic imaging cortical map into stage coordinates on the two-photon imaging system  
60 so as to allow repetitive targeting of individual field of views.

61

#### 62 **Surgery**

63 Prior to implantation, a 3D printed acrylic photopolymer microscope well (to facilitate  
64 the use of liquid immersion objectives) was glued to the titanium headframe with Loctite  
65 406 using a jig to ensure uniform offset between the center of the well and the reference  
66 surfaces of the clamp (Supplemental Figure 2b).

67 Transgenic mice expressing GCaMP6f were weaned and genotyped at ~p21, and  
68 surgery was performed between p37 and p63. Surgical eligibility criteria included: 1)  
69 weight  $\geq 19.5$ g (males) or  $\geq 16.7$ g (females); 2) normal behavior and activity; and 3) healthy  
70 appearance and posture. A pre-operative injection of dexamethasone (3.2 mg/kg, S.C.)  
71 was administered 3h before surgery. Mice were initially anesthetized with 5% isoflurane  
72 (1-3 min) and placed in a stereotaxic frame (Model# 1900, Kopf, Tujunga, CA), and  
73 isoflurane levels were maintained at 1.5-2.5% for the duration of the surgery. An injection  
74 of carprofen (5-10 mg/kg, S.C.) was administered and an incision was made to remove  
75 skin, and the exposed skull was levelled with respect to pitch (bregma-lambda level), roll  
76 and yaw.

77 The stereotax was zeroed on lambda using a custom headframe holder equipped  
78 with a stylus affixed to a clamp-plate (Supplemental Figure 2c). The stylus was then  
79 replaced with the headframe, which was lowered and affixed to the skull with Metabond.  
80 Once dried, the mouse was placed in a custom clamp (Supplemental Figure 2d) to



81 position the skull at a rotated angle of 23 and pitch angle of 6, such that visual cortex was  
82 horizontal to facilitate the craniotomy. The craniotomy was centered at X = -2.8mm and Y  
83 = 1.3mm with respect to lambda (centered over the left mouse visual cortex). A circular  
84 piece of skull 5 mm in diameter was removed, and a durotomy was performed. A  
85 coverslip stack (two 5mm and one 7mm glass coverslip adhered together) was cemented  
86 in place with Vetbond<sup>13</sup>. Metabond cement was applied around the cranial window inside  
87 the well to secure the glass window. Post-surgical brain health was documented using a  
88 custom photo-documentation system (Supplemental Figure 2e) to acquire a spatially  
89 registered image of the cranial window. One, two, and seven days following surgery,  
90 animals were assessed for overall health (bright, alert and responsive), cranial window  
91 clarity and brain health.

92

### 93 **Intrinsic Imaging**

94 A retinotopic map was created using intrinsic signal imaging (ISI) in order to define  
95 visual area boundaries and target *in vivo* two-photon calcium imaging experiments to  
96 consistent retinotopic locations<sup>14</sup>. Mice were lightly anesthetized with 1-1.4% isoflurane  
97 administered with a somnosuite (model #715; Kent Scientific, CON). Vital signs were  
98 monitored with a Physiosuite (model # PS-MSTAT-RT; Kent Scientific). Eye drops (Lacri-  
99 Lube Lubricant Eye Ointment; Refresh) were applied to maintain hydration and clarity of  
100 eye during anesthesia. Mice were placed on a lab jack platform and headfixed for imaging  
101 normal to the cranial window.

102 The brain surface was illuminated with two independent LED lights: green (peak  
103  $\lambda=527\text{nm}$ ; FWHM=50nm; Cree Inc., C503B-GCN-CY0C0791) and red (peak  $\lambda=635\text{nm}$  and  
104 FWHM of 20nm; Avago Technologies, HLMP-EG08-Y2000) mounted on the optical lens.  
105 A pair of Nikon lenses lens (Nikon Nikkor 105mm f/2.8, Nikon Nikkor 35mm f/1.4),  
106 provided 3.0x magnification ( $M=105/35$ ) onto an Andor Zyla 5.5 10tap sCMOS camera. A  
107 bandpass filter (Semrock; FF01-630/92nm) was used to only record reflected red light onto  
108 the brain.

109 A 24" monitor was positioned 10 cm from the right eye. The monitor was rotated 30°  
110 relative to the animal's dorsoventral axis and tilted 70° off the horizon to ensure that the  
111 stimulus was perpendicular to the optic axis of the eye. The visual stimulus displayed was  
112 comprised of a 20° x 155° drifting bar containing a checkerboard pattern, with individual  
113 square sizes measuring 25°, that alternated black and white as it moved across a mean-  
114 luminance gray background. The bar moved in each of the four cardinal directions 10  
115 times. The stimulus was warped spatially so that a spherical representation could be  
116 displayed on a flat monitor<sup>15</sup>.

117 After defocusing from the surface vasculature (between 500  $\mu\text{m}$  and 1500  $\mu\text{m}$  along  
118 the optical axis), up to 10 independent ISI timeseries were acquired and used to measure  
119 the hemodynamic response to the visual stimulus. Averaged sign maps were produced  
120 from a minimum of 3 timeseries images for a combined minimum average of 30 stimulus  
121 sweeps in each direction<sup>16</sup>.

122 The resulting ISI maps were automatically segmented by comparing the sign,  
123 location, size, and spatial relationships of the segmented areas against those compiled in  
124 an ISI-derived atlas of visual areas. A cost function, defined by the discrepancy between  
125 the properties of the matched areas, was minimized to identify the best match between  
126 visual areas in the experimental sign map and those in the atlas, resulting in an auto-  
127 segmented and annotated map for each experiment. Manual correction and editing of the  
128 results included merging and splitting of segmented and annotated areas to correct errors.

129 Finally, target maps were created to guide *in vivo* two-photon imaging location using  
130 the retinotopic map. Target locations were identified for each visual area, restricted to  
131 within 10° of the center of gaze.

132

### 133 **Habituation**

134 Following successful ISI mapping, mice spent two weeks being habituated to head  
135 fixation and visual stimulation. During the first week mice were handled and head fixed for  
136 progressively longer durations, ranging from 5 to 10 minutes. During the second week,  
137 mice were head fixed and presented with visual stimuli, starting for 10 minutes and  
138 progressing to 50 minutes of visual stimuli by the end of the week. During this week they  
139 were exposed to all of the stimuli used during data collection. Mice received a single 60  
140 min habituation session on the two-photon microscope, during which they were head fixed  
141 under the objective and a stimulus was presented.

142

### 143 **Two photon in vivo calcium imaging**

144 Calcium imaging was performed using a two-photon-imaging instrument (either a  
145 Scientifica Vivoscope or a Nikon A1R MP+; the Nikon system was adapted to provide  
146 space to accommodate the behavior apparatus). Laser excitation was provided by a  
147 Ti:Sapphire laser (Chameleon Vision – Coherent) at 910 nm. Pre-compensation was set at  
148 ~10,000 fs<sup>2</sup>. Movies were recorded at 30Hz using resonant scanners over a 400 μm field  
149 of view. Temporal synchronization of all data-streams (calcium imaging, visual stimulation,  
150 body and eye tracking cameras) was achieved by recording all experimental clocks on a  
151 single NI PCI-6612 digital IO board at 100 kHz.

152 Mice were head-fixed on top of a rotating disk and free to walk at will. The disk was  
153 covered with a layer of removable foam (Super-Resilient Foam, 86375K242, McMaster) to  
154 alleviate motion-induced artifacts during imaging sessions. All two-photon imaging  
155 experiments were conducted under ambient red light to maintain the reversed day-night  
156 cycle. Data was initially obtained with the mouse eye centered both laterally and vertically  
157 on the stimulation screen and positioned 15 cm from the screen, with the screen parallel to  
158 the mouse's body. Later, the screen was moved to better fill the visual field. The normal  
159 distance of the screen from the eye remained at 15 cm, but the screen center moved to a  
160 position 118.6 mm lateral, 86.2 mm anterior and 31.6 mm dorsal to the right eye.

161 An experiment container consisted of three imaging sessions (60 min each) at a  
162 given field of view during which mice passively observed three different stimuli. One  
163 imaging session was performed per day, for a maximum of 16 sessions for each mouse.

164 On the first day of imaging at a new field of view, the ISI targeting map was used to  
165 select spatial coordinates. A comparison of superficial vessel patterns was used to verify  
166 the appropriate location by imaging over a field of view of ~800  $\mu\text{m}$  using epi-fluorescence  
167 and blue light illumination. Once a cortical region was selected, the objective was shielded  
168 from stray light coming from the stimulation screen using opaque black tape. In two-photon  
169 imaging mode, the desired depth of imaging was set to record from a specific cortical  
170 depth. On subsequent imaging days, we returned to the same location by matching (1) the  
171 pattern of vessels in epi-fluorescence with (2) the pattern of vessels in two photon imaging  
172 and (3) the pattern of cellular labelling in two photon imaging at the previously recorded  
173 location.

174 Once a depth location was stabilized, a combination of PMT gain and laser power  
175 was selected to maximize laser power (based on a look-up table against depth) and  
176 dynamic range while avoiding pixel saturation (max number of saturated pixels <1000).  
177 The stimulation screen was clamped in position, and the experiment began. Two-photon  
178 movies (512x512 pixels, 30Hz), eye tracking (30Hz), and a side-view full body camera  
179 (30Hz) were recorded and continuously monitored. Recording sessions were 1 hour long  
180 but were interrupted if any of the following was observed: 1) mouse stress as shown by  
181 excessive secretion around the eye, nose bulge, and/or abnormal posture; 2) excessive  
182 pixel saturation (>1000 pixels) as reported in a continuously updated histogram; 3) loss of  
183 baseline intensity in excess of 20% caused by bleaching and/or loss of immersion water;  
184 4) hardware failures causing a loss of data integrity. Immersion water was occasionally  
185 supplemented while imaging using a micropipette taped to the objective (Microfil  
186 MF28G67-5 WPI) and connected to a 5 ml syringe via an extension tubing. At the end of  
187 each experimental session, a z-stack of images (+/- 30  $\mu\text{m}$  around imaging site, 0.1  $\mu\text{m}$   
188 step) was collected to evaluate cortical anatomy and evaluate z-drift during the course of  
189 experiment. Experiments with z-drift above 10 $\mu\text{m}$  over the course of the entire session  
190 were excluded. In addition, for each experimental area analyzed, a full-depth cortical z  
191 stack (~700  $\mu\text{m}$  total depth, 5  $\mu\text{m}$  step) was collected to document the imaging site  
192 location.

193

## 194 **Visual Stimulation**

195 Visual stimuli were generated using custom scripts written in PsychoPy<sup>17,18</sup> (Peirce,  
196 2007, 2008) and were displayed using an ASUS PA248Q LCD monitor, with 1920 x 1200  
197 pixels. Stimuli were presented monocularly, and the monitor was positioned 15 cm from  
198 the mouse's eye, and spanned 120° X 95° of visual space. Each monitor was gamma  
199 corrected and had a mean luminance of 50 cd/m<sup>2</sup>. To account for the close viewing angle  
200 of the mouse, a spherical warping was applied to all stimuli to ensure that the apparent  
201 size, speed, and spatial frequency were constant across the monitor as seen from the  
202 mouse's perspective.

203 Visual stimuli included drifting gratings, static gratings, locally sparse noise, natural  
204 scenes and natural movies. These stimuli were distributed across three ~60 minute  
205 imaging sessions (Figure 1f). During session A the drifting gratings, natural movie one  
206 and natural movie three stimuli were presented. During session B the static gratings,  
207 natural scenes, and natural movie one were presented. During session C the locally  
208 sparse noise, natural movie one and natural movie two were presented. In each session,  
209 the different stimuli were presented in segments of 5-13 minutes and interleaved with each  
210 other. In addition, at least 5 minutes of spontaneous activity were recorded in each  
211 session.

212 The drifting gratings stimulus consisted of a full field drifting sinusoidal grating at a  
213 single spatial frequency (0.04 cycles/degree) and contrast (80%). The grating was  
214 presented at 8 different directions (separated by 45°) and at 5 temporal frequencies (1, 2,  
215 4, 8, 15 Hz). Each grating was presented for 2 seconds, followed by 1 second of mean  
216 luminance gray before the next grating. Each grating condition (direction & temporal  
217 frequency combination) was presented 15 times. Trials were randomized, with blank  
218 sweeps (i.e. mean luminance gray instead of grating) presented approximately once every  
219 20 trials.

220 The static gratings stimulus consisted of a full field static sinusoidal grating at a  
221 single contrast (80%). The grating was presented at 6 different orientations (separated by  
222 30°), 5 spatial frequencies (0.02, 0.04, 0.08, 0.16, 0.32 cycles/degree), and 4 phases (0,  
223 0.25, 0.5, 0.75). The grating was presented for 0.25 seconds, with no inter-grating gray  
224 period. Each grating condition (orientation, spatial frequency, and phase) was presented  
225 ~50 times. Trials were randomized, with blank sweeps presented approximately once  
226 every 25 trials.

227 The natural scenes stimulus consisted of 118 natural images. Images were taken  
228 from the Berkeley Segmentation Dataset<sup>19</sup>, the van Hateren Natural Image Dataset<sup>20</sup>, and  
229 the McGill Calibrated Colour Image Database<sup>21</sup>. The images were presented in grayscale  
230 and were contrast normalized and resized to 1174 X 918 pixels. The images were  
231 presented for 0.25 seconds each, with no inter-image gray period. Each image was  
232 presented ~50 times. Trials were randomized, with blank sweeps approximately once  
233 every 100 images.

234 Three natural movie clips were used from the opening scene of the movie *Touch of*  
235 *Evi*<sup>22</sup>. Natural Movie One and Natural Movie Two were both 30 second clips while Natural  
236 Movie Three was a 120 second clip. All clips had been contrast normalized and were  
237 presented in grayscale at 30 fps. Each movie was presented 10 times with no inter-trial  
238 gray period. Natural Movie One was presented in each imaging session.

239 The locally sparse noise stimulus consisted of white and dark spots on a mean  
240 luminance gray background. Each spot was a square, 4.65° on a side. Each frame of the  
241 stimulus had ~11 spots on the monitor, with no two spots within 23° of each other, and  
242 was presented for 0.25 seconds. Each of the 16 x 28 spot locations was occupied by white  
243 and black spots a variable number of time (mean=115). For most of the collected data, this

244 stimulus was adapted such that half of it used 4.65° spots while the other half used 9.3°  
245 spots, with an exclusion zone of 46.5°.

246

## 247 **Serial Two-Photon Tomography**

248 Serial two-photon tomography was used to obtain a 3D image volume of coronal  
249 brain images for each specimen. This 3D volume enables spatial registration of each  
250 specimen's associated ISI and optical physiology data to the Allen Mouse Common  
251 Coordinate Framework (CCF). Methods for this procedure have been described in detail in  
252 whitepapers associated with the Allen Mouse Brain Connectivity Atlas in Documentation  
253 for that resource, and in the associated publication<sup>23</sup>.

254 Mice were anesthetized with 5% isoflurane and intracardially perfused with 10 ml of  
255 saline (0.9% NaCl) followed by 50 ml of freshly prepared 4% paraformaldehyde (PFA) at a  
256 flow rate of 9 ml/min. Brains were rapidly dissected and post-fixed in 4% PFA at room  
257 temperature for 3-6 hours and overnight at 4°C. Brains were then rinsed briefly with PBS  
258 and stored in PBS with 0.02% sodium azide before proceeding to the next step. Agarose  
259 was used to embed the brain in a semisolid matrix for serial imaging. The brain was  
260 placed in a 4% oxidized agarose solution made by stirring 10 mM NaIO<sub>4</sub> in agarose, then  
261 transferring through 50 mM phosphate buffer and embedding at 60°C in a grid-lined  
262 embedding mold to standardize placement of the brain in an aligned coordinate space.  
263 The agarose block was then left at room temperature for 20 minutes to allow agarose to  
264 solidify, and then covalent interaction between the brain tissue and the agarose was  
265 promoted by placing the block in 0.2% sodium borohydride in 50 mM sodium borate buffer  
266 (pH 9.0) for 48 hours at 4°C. The agarose block was then mounted on a 1x3 glass slide  
267 using Loctite 404 glue and prepared immediately for serial imaging.

268 Multi-photon image acquisition was performed using a customized TissueCyte 1000  
269 system (TissueVision, Cambridge, MA) coupled with an ultra-fast mode-locked Ti:Sapphire  
270 laser. First the mounted specimen was placed on the metal plate in the center of the  
271 cutting bath, which was filled with PBS with 0.02% sodium azide and placed onto the  
272 sample stage. A new vibratome blade was used for each specimen and aligned to be  
273 parallel to the leading edge of the specimen block. Next, the top surface of the specimen  
274 block was brought up to the level of the vibratome blade by adjusting the sample stage  
275 height. The z-stage was set to slice at 100 µm intervals. Specimens were oriented for  
276 image acquisition to occur from the caudal to the rostral end. The XY scan area consists of  
277 221 tiles (17 rows x 13 columns). Each tile was imaged at a resolution of 0.3 µm/pixel or  
278 0.8 µm/pixel. The specimen was illuminated with a 925 nm wavelength laser with a Zeiss  
279 20x water immersion objective (NA = 1). A 560 nm dichroic (Chroma, Bellows Falls, VT)  
280 split the emission light, and a 500 nm dichroic (Chroma) further split the emission for a  
281 total of three channels. The 593/40 nm (Chroma), 520/35 nm (Semrock, Rochester, NY)  
282 and 447/60 nm emission filter (Chroma) were used for the Red, Green and Blue channels,  
283 respectively. In order to scan a full tissue section, individual tile images were acquired, and  
284 the entire stage (Physik Instrumente) was moved between each tile. After an entire section  
285 was imaged, the X and Y stages moved the specimen to the vibratome, which cut a 100

286  $\mu\text{m}$  section and returned the specimen to the objective for imaging of the next section. The  
287 blade vibrated at 60 Hz and the stage moved toward blade at 0.5 mm/sec during cutting.

288

### 289 **Post-mortem assessment of brain structure**

290 Morphological and structural analysis of each experimental mouse's brain was  
291 performed following collection of the 2P serial imaging (TissueCyte) dataset  
292 (Supplemental Figure 6).

293 The following characteristics warranted an automatic failure of all datasets  
294 associated with the mouse: (1) Abnormal GCaMP6 expression pattern; (2) Necrotic brain  
295 tissue; (3) Compression of the contralateral cortex that resulted in disruption to the  
296 cortical laminar structure; (4) Compression of the ipsilateral cortex (caused by a skull  
297 growth) or adjacent to the cranial window.

298 The following characteristics may have resulted in, but did not warrant automatic,  
299 failure of the datasets associated with the mouse. (1) Compression of the contralateral  
300 cortex due to a skull growth; (2) Excessive compression of the cortex underneath the  
301 cranial window; (3) Abnormal or enlarged ventricles.

302

### 303 **Image processing**

304 For each two-photon imaging session, the image processing pipeline performed, in  
305 order, 1) spatial or temporal calibration specific to a particular microscope, 2) motion  
306 correction, 3) image normalization to minimize confounding random variations between  
307 sessions, 4) segmentation of connected shapes, and 5) classification of soma-like shapes  
308 from remaining clutter (Supplemental Figure 9). Once all the parameters were initially  
309 tuned, the pipeline ran fully automatically across all of the varied experimental conditions  
310 of the campaign without manual intervention.

311 The motion correction algorithm relied on phase correlation and only corrected for  
312 rigid translational errors. It performed the following steps. Each movie was partitioned into  
313 400 consecutive frame blocks, representing 13.3 seconds of video. Each block was  
314 registered iteratively to its own average 3 times (Supplementary Figure 9a-b). A second  
315 stage of registration integrated the periodic average frames themselves into a single global  
316 average frame through 6 additional iterations (Supplementary Figure 9c). The global  
317 average frame served as the reference image for the final resampling of every raw frame  
318 in the video (Supplementary Figure 9d).

319 Each 13.3 second block was used to generate normalized periodic averages using  
320 the following steps. First, we subtracted the mean from the maximum projection to retain  
321 pixels from active cells (Supplementary Figure 9e-f-g). To select objects of the right size  
322 during segmentation, we convolved all periodic normalized averages with a 3x3 median  
323 filter and a 47x47 high-pass mean filter. We then normalized the histogram of all resulting  
324 frames (Supplementary Figure 9g-h).

325 All normalized periodic averages were then segmented using an adaptive threshold  
326 filter to create an initial estimate of binarized ROI masks of unconnected components  
327 (Supplemental Figure 9i). Given GCaMP6 lower expression in cell nuclei, good detections  
328 from somata tended to show bright outlines and dark interiors. We then performed a  
329 succession of morphological operations to fill closed holes and concaves shapes  
330 (Supplemental Figure 9j-k).

331 These initial ROI masks included shapes from multiple periods that were actually from  
332 a single cell. To further reduce the number of masks to putative individual cell somas, we  
333 computed a feature vector from each mask that included morphological attributes such as  
334 location, area, perimeter, and compactness, among others (Supplemental Figure 9l). A  
335 battery of heuristic decisions applied on these attributes allowed to combine, eliminate or  
336 maintain ROI (Supplemental Figure 9l-m). A final discrimination step, using a binary  
337 relevance classifier fed by experimental metadata (Cre, imaging depth) along with the  
338 previous morphological features, further filtered the global masks into the final ROIs used  
339 for trace extraction.

340

### 341 **Neuropil Subtraction**

342 To correct for contamination of the ROI calcium traces by surrounding neuropil, we  
343 modeled the measured fluorescence trace of each cell as  $F_M = F_C + rF_N$ , where  $F_M$  is the  
344 measured fluorescence trace,  $F_C$  is the unknown true ROI fluorescence trace,  $F_N$  is the  
345 fluorescence of the surrounding neuropil, and  $r$  is the contamination ratio. To estimate the  
346 contamination ratio for each ROI, we selected the value of  $r$  that minimized the cross-  
347 validated error,  $E = \sum_t |F_C - F_M + rF_N|^2$ , over four folds. This minimization was performed  
348 by computing the error over each fold with a fixed value of  $r$ , for a range of  $r$  values. For  
349 each fold,  $F_C$  was computed by minimizing the cost function  $C = \sum_t |F_C - F_M + rF_N|^2 +$   
350  $\lambda |LF_C|^2$ , where  $L$  is the discrete first derivative (to enforce smoothness of  $F_C$ ) and  $\lambda$  is a  
351 penalty parameter we set to 0.05. After determination of  $r$ , we computed the true trace as  
352  $F_C = F_M - rF_N$ , which is used in all subsequent analysis.

353

### 354 **Demixing traces from overlapping ROIs**

355 To avoid artificially correlating neurons' activity by averaging fluorescence over two  
356 spatially overlapping ROIs, we demixed the activity of all recorded ROIs. We used a model  
357 where every ROI had a trace distributed in some spatially heterogeneous, time-dependent  
358 fashion:

$$359 \quad F_{it} = \sum_k W_{kit} T_{kt}$$

360 where  $W$  is a tensor containing time-dependent weighted masks:  $W_{kit}$  measures how  
361 much of neuron  $k$ 's fluorescence is contained in pixel  $i$  at time  $t$ .  $T_{kt}$  is the fluorescence  
362 trace of neuron  $k$  at time  $t$  - this is what we want to estimate.  $F_{it}$  is the recorded  
363 fluorescence in pixel  $i$  at time  $t$ .

364 Importantly, this model applied to all ROIs, including those too small to be a neuron  
 365 or otherwise filtered out. We filtered out duplicate ROIs (defined as two ROIs with >70%  
 366 overlap) and ROIs that were the union of two other ROIs (any ROI where the union of any  
 367 other two ROIs accounted for 70% of its area) before demixing and applied the remaining  
 368 filtering criteria after demixing. Projecting the movie  $F$  onto the binary masks,  $A$ , reduced  
 369 the dimensionality of the problem from 512x512 pixels to the number of ROIs:

$$370 \quad \sum_i A_{ki} F_{it} = \sum_{k,i} A_{ki} W_{kit} T_{kt}$$

371 where  $A_{ki}$  is one if pixel  $i$  is in ROI  $k$  and zero otherwise—these are the ROI masks  
 372 from segmentation, after filtering out duplicate and union ROIs. At a particular time point  $t$ ,  
 373 this yields the simple linear regression:

$$374 \quad AF(t) = (AW^T(t))T(t)$$

375 where we estimated the weighted masks  $W$  by the projection of the recorded  
 376 fluorescence  $F$  onto the binary ROI masks  $A$ . On every imaging frame  $t$ , we computed the  
 377 linear least squares solution  $\hat{T}$  to extract each ROI's trace value at that time point.

378 It was possible for ROIs to have negative or zero demixed traces  $\hat{T}$ . This occurred if  
 379 there were union ROIs (one ROI composed of two neurons) or duplicate ROIs (two ROIs  
 380 in the same location with approximately the same shape) that our initial detection missed.  
 381 If this occurred, those ROIs and any that overlapped with them were removed from the  
 382 experiment. This led to the loss of ~1% of ROIs.

383

### 384 **ROI Matching**

385 The field of view for each session, and the segmented ROI masks, were registered  
 386 to each other using an affine transformation. To map cells, a bipartite graph matching  
 387 algorithm was used to find correspondence of cells between sessions A and B, A and C,  
 388 and B and C. The algorithm took cells in the pair-wise experiments as nodes, and the  
 389 degree of spatial overlapping and closeness between cells in the two experiments as  
 390 weight of edge of the nodes. By maximizing the summed weights of edges, the bipartite  
 391 matching algorithm found the best matching between cells of the two experiments. Finally,  
 392 a label combination process was applied to the matching results of A and B, A and C, and  
 393 B and C, producing a unified label for all three experiments.

394

### 395 $\Delta F/F$

396 To calculate the  $\Delta F/F$  for each fluorescence trace, we first calculate baseline  
 397 fluorescence using a median filter of width 5401 samples (180 seconds). We then  
 398 calculate the change in fluorescence relative to baseline fluorescence ( $\Delta F$ ), divided by  
 399 baseline fluorescence ( $F$ ). Due to preprocessing of the fluorescence traces, in rare cases  
 400 the estimated baseline fluorescence can be very small or negative. To prevent spurious



401  $\Delta F/F$  estimates, we thus set the baseline as the maximum of the median filter estimated  
402 baseline and the standard deviation of the estimated noise of the fluorescence trace.

403

#### 404 **L0 penalized event detection**

405 The measured fluorescence traces that result from calcium imaging are noisy and  
406 slow reflections of underlying neural spikes. To properly estimate the functional properties  
407 of neurons we wish to infer their instantaneous spiking activity based on their measured  
408 fluorescence traces. A recent paper demonstrated a fast algorithm for finding the exact L0-  
409 penalized solution for the event detection problem [Jewell, Witten, 2017] and showed that  
410 the L0-penalized solutions typically outperform L1-penalized solutions in the detection of  
411 spikes from fluorescence traces. This L0-penalized algorithm forms the basis for our event  
412 detection pipeline. As we show below, low firing rate activity such as isolated spikes is  
413 difficult to detect in calcium signals, so we refer to this as “event” detection.

414 For each  $\Delta F/F$  trace we remove slow timescale shifts in the fluorescence using a  
415 median filter of width 101 samples (3.3 seconds). We then apply the L0-penalized  
416 algorithm to the corrected  $\Delta F/F$  trace. The L0 algorithm has two hyperparameters: gamma  
417 and lambda. Gamma corresponds to the decay constant of the calcium indicator. We set  
418 gamma to be the decay constant obtained from jointly recorded optical and  
419 electrophysiology with the same genetic background and calcium indicator. Supplemental  
420 Figure 11 shows the extracted linear kernels for Emx1-Ai93 and Cux2-Ai93 from which  
421 gamma has been extracted by fitting the fluorescence decay with a single exponential.  
422 The rise time, amplitude, and shape of the extracted linear kernels are mainly a function of  
423 the genetically encoded calcium indicator (GCaMP6f) and appear to be largely  
424 independent of the specific promoter driving expression.

425 Lambda controls the strength of the L0 penalty. To estimate lambda, we first  
426 estimate the standard deviation of the intrinsic noise in the trace. We then set lambda to  
427 minimize the number of events smaller than two standard deviations of the noise  
428 distribution, while retaining at least one recovered event. The values for gamma and  
429 lambda as described above are then used to obtain a set of predicted neural events. We  
430 use these event traces as input for all of our various analyses.

431 To assess how the events detected using the above procedure relate to actual  
432 measured action potentials (spikes) that underlie the fluorescence time series, we  
433 performed L0 event detection on the calcium-related fluorescence of cells that had been  
434 imaged simultaneously with loose patch recordings. Since the true spike train is known for  
435 these data, we computed the expected probability of detecting an event, as well as the  
436 expected event magnitude, as a function of the number of spikes observed in a set of  
437 detection windows relevant to the pipeline data analyses (e.g. static gratings, natural  
438 scenes, and locally sparse noise templates are presented for 0.25 s each). Supplemental  
439 Figure 11cd show results for Emx1-Ai93 and Cux2-Ai93, respectively.

440 The error bars in the graphs represent twice the standard error of the mean across  
441 cells. The false positive rate, as measured by the probability of detecting an event given

442 no spike in the simultaneously recorded membrane potential in a window of given length,  
443 is generally low but increases with detection window length. Bursts within short time  
444 windows correspond to high instantaneous firing rates and result in detected events with  
445 high likelihood (e.g. >5 spikes within 100 ms result in events detected with > 80% chance).  
446 Bursts within longer windows can have lower instantaneous firing rates (i.e. longer  
447 average inter-spike intervals), and thus, for a given spike count, the average detection  
448 probability decreases with increasing detection window length. For similar reasons,  
449 expected event magnitudes tend to decrease for longer event detection windows as well.  
450 The size of the error bars, in turn, decreases with increasing window length because for  
451 longer windows, more instances of any given spike count were observed.

452 Overall, the calibration results are quite similar across the two juxtaposed promoters  
453 (Cux2 vs Emx1), which were compared for excitatory Layer 2/3 pyramidal cells. For both  
454 promoters, the chances of detecting an event in response to a single spike is negligible  
455 (<10%) for short windows, and not significantly higher than the false positive rate for  
456 longer windows. 50% event detection probability is reached for 4 spikes (Cux2) and 3  
457 spikes (Emx1), respectively within windows shorter than 500 ms. The expected magnitude  
458 of the detected events is largely a monotonic function of the number of underlying neural  
459 spikes. However, the size of the error bars suggests that this information may not be  
460 entirely sufficient to precisely infer spike counts from event magnitudes. Moreover, for  
461 Emx1, this relationship seems to saturate earlier than for Cux2. These differences  
462 between Cux2 and Emx1 are minor but seem consistent with higher levels of GCaMP6f  
463 expression under the Emx1 promoter.

464

## 465 **Analysis**

466 All analysis was performed using custom scripts written in Python using NumPy,  
467 SciPy<sup>24</sup>, Pandas<sup>25</sup> and Matplotlib<sup>26</sup>.

468 Using the derived events, the average responses to each stimulus condition was  
469 computed for each cell in response to the drifting gratings, static gratings and natural  
470 scenes. From this, the preferred stimulus condition was identified as the stimulus condition  
471 that elicited the largest average response. For each trial of the stimulus, the neural activity  
472 of the cell was compared to a distribution of activity for that cell taken during the epoch of  
473 spontaneous activity, and a p-value computed. If at least 25% of the trials in response to a  
474 cell's preferred condition had a significant difference from the distribution of spontaneous  
475 activities, the cell was deemed to be responsive to that stimulus and included in further  
476 analyses.

477 Direction selectivity was computed from mean responses to drifting gratings, at the  
478 cell's preferred temporal frequency, as

$$479 \quad gDSI = \frac{\sum R_{\theta} e^{i\theta}}{\sum R_{\theta}}$$

480 where  $\theta$  is the direction of grating movement, and  $R_{\theta}$  is the mean response to that  
481 direction of movement.

482 The temporal frequency tuning, at a cell's preferred orientation, was fit using either  
483 an exponential curve (if the peak temporal frequency was at either extreme) or a Gaussian  
484 curve (if the peak temporal frequency was at an intermediate value). The reported  
485 preferred temporal frequency was taken from these fits. The same was done for spatial  
486 frequency tuning, fit at the cell's preferred orientation and phase in response to the static  
487 gratings. In both cases, if a fit could not converge, a preferred frequency was not reported.

488 Spatial receptive fields were fit from the responses to locally sparse noise. Because  
489 more than one stimulus spot was present during a given trial, it is not possible to conclude  
490 (on a per-trial basis) the stimulus-response relationship between spot locations and  
491 responses. Therefore, a statistically significant co-occurrence of spot presentation and  
492 responses across trials defined the inclusion criteria for membership of a stimulus pixel in  
493 the receptive field. To begin, the stimulus was convolved with a spatial Gaussian ( $4.65^\circ$   
494 per sigma), to allow pooling of contributions to responses from nearby pixels. A p-value is  
495 was computed for each spot (black and white separately) by constructing a null distribution  
496 for the number of trials that a spot was present during responsive trials. This per-pixel null  
497 distribution was estimated by shuffling the identity of the responsive trials ( $n=10,000$   
498 shuffles), breaking the relationship between stimulus and response under the assumption  
499 of a background level of responsiveness independent of the stimulus. Statistical outliers  
500 (i.e. pixels present during events more often than can be accounted for by chance) were  
501 identified by computing a p-value for each spot relative to its null (shuffled) distribution.  
502 These p-values were then corrected for false discoveries using the Šidák multiple  
503 comparisons correction, and thresholded at  $p=0.05$  to identify receptive field membership.

504 An additional test was performed to confirm the presence of a receptive field. We  
505 defined the null model that a neuron lacking a receptive field has equal probability of  
506 producing a response regardless of the location and luminance (i.e. black or white) of the  
507 spots displayed on the screen on any given trial. In contrast, a neuron has a statistically  
508 significant receptive field if there is a deviation beyond chance from responsive trials  
509 occurring with equal probability across all spot locations and luminances. Therefore, chi-  
510 square tests for independence were performed for each neuron to quantify the  
511 dependence of responsive trials on the stimulus.

512 An assumption of the chi-square test is that the response of the neuron on a given  
513 trial can only be attributed to a single spot; that is, only a single stimulus spot is presented  
514 on each trial. Although multiple non-gray spots appeared on the screen during each trial,  
515 the exclusion region of the locally sparse noise stimulus, by construction, prevented two  
516 non-gray pixels within a  $23^\circ$  radius (for the  $4.65^\circ$  spot size) or  $46^\circ$  radius (for the  $9.3^\circ$  spot  
517 size) of one another from being presented on the same trial. Leveraging this structure in  
518 the stimulus, chi-square tests were performed on patches in visual space small enough to  
519 ensure that two or more non-gray pixels were rarely presented on the same trial, but large  
520 enough to ensure that the patch completely contains the receptive field and includes visual  
521 space outside of the receptive field in order for the chi-square test to detect the  
522 dependence of neuron responses on spot locations. We chose  $32.2^\circ \times 32.2^\circ$  patches for  
523  $4.65^\circ$  spots and  $64.4^\circ \times 64.4^\circ$  patches for the  $9.3^\circ$  spot LSN (i.e.  $7 \times 7$  grid of spot locations in  
524 each case). For each neuron, multiple chi-square tests were performed on such patches to

525 tile the entire stimulus monitor and the p-values from these tests were then corrected  
 526 using the Šidák method to account for the multiple comparisons. If the p-value for any  
 527 patch on the stimulus monitor yielded was significant ( $p < 0.05$ ) after multiple comparison  
 528 correction, the neuron was considered to have a receptive field.

529 Finally, if a neuron was found to have a receptive field, the spots that were  
 530 identified for receptive field membership were fit with a two-dimensional Gaussian  
 531 distribution, with orientation, azimuth/elevation, and x/y standard deviation serving as  
 532 degrees of freedom for the optimization. On and Off subunits (eg. white and black spots)  
 533 were fit separately. Subunit area was defined as the 1.5 standard deviation ellipse under  
 534 this fit gaussian, measured in units of squared visual degrees. Up to two On and Off  
 535 subunits were fit. The dimensionless overlap index is computed as the area of overlap of  
 536 the two-dimensional gaussians fit to each On and Off subunits, normalized by their  
 537 geometric means

$$538 \quad OI = \frac{A_{on} \cap A_{off}}{\sqrt{A_{on}A_{off}}}$$

539 The total areas of the receptive field was computed as the sum of all subunit areas,  
 540 correcting for overlap.

541 Lifetime sparseness was computed using the definition in Vinje and Gallant<sup>27</sup>.

$$542 \quad S_L = \frac{1 - \frac{1}{N} \frac{(\sum_i r_i)^2}{\sum_i r_i^2}}{1 - \frac{1}{N}}$$

543 where  $N$  is the number of stimulus conditions and  $r_i$  is the response of the neuron to  
 544 stimulus condition  $i$  averaged across trials. Population sparseness was computed with the  
 545 same metric, but where  $N$  is the number of neurons and  $r_i$  is average response vector of  
 546 neuron  $i$  to all stimulus conditions.

547 Reliability was defined as  $CC_{max}^2$ , where  $CC_{max}$  is the expected correlation between  
 548 the sample trial averaged response and the true (unmeasured) mean response. We follow  
 549 the computation from Schoppe, *et al.*<sup>28</sup>:

$$550 \quad \frac{1}{CC_{max}} = \sqrt{1 - \frac{1}{N} \left( \frac{\left(1 - \frac{1}{N}\right) \times \sum_{n=1}^N Var(R_n)}{Var(\sum_{n=1}^N R_n) - \sum_{n=1}^N Var(R_n)} \right)}$$

551 where  $N$  is the number of trials and  $R_n$  is the time series of the response on the  $n$ th trial.  
 552 For  $R_n$  we use the trace of extracted event magnitudes at 30Hz, smoothed with a  
 553 Gaussian window of width 0.25s.

554 We computed “noise” and “signal” correlations in the population responses. Signal  
 555 correlations were computed as the Pearson correlation between the trial-averaged  
 556 stimulus responses of pairs of neurons. Noise correlations were computed as the Pearson  
 557 correlation of the single-trial stimulus responses for a pair of neurons and a given stimulus,

558 and then averaged over stimuli. For natural movies, we computed the noise and signal  
559 correlations of the binned event counts in non-overlapping 10 frame windows. We  
560 computed “spontaneous correlations” as the Pearson correlation of the detected event  
561 trains during the periods of spontaneous activity recording.

562

### 563 Decoding

564 We used non-parametric (K-neighbors) classifiers to decode the visual stimulus  
565 identity (e.g. the natural scene number, within the natural scene responses) from the  
566 population vector of single-trial responses, using the Pearson correlation distance between  
567 response vectors. We report the performance on the held-out data from five-fold cross-  
568 validation. On each cross-validation fold, we performed an inner-round of 2-fold cross-  
569 validation to choose the number of neighbors from eight logarithmically spaced options (1,  
570 2, 4, 7, 14 and 27). To examine how decoding performance depended on the number of  
571 neurons, we took a range of sample sizes. For each sample size, we uniformly chose five  
572 samples of neurons. To compare decoding performance between behavioral conditions,  
573 we used stimulus conditions (e.g. individual natural scenes) with at least five repetitions in  
574 each behavioral condition. We used the same number of repetitions (uniformly sampled)  
575 for each stimulus in each behavioral condition.

576

### 577 3D Gabor Wavelet Model

578 We model the response properties of each neuron as a quadratic function of the  
579 input pixels. Each neuron is modeled as a sparse linear combination of linear and  
580 quadratic basis functions. Similar techniques have been successfully used to model  
581 neurons and voxels in visual cortex both in animals and humans<sup>29-31</sup>. Our basis functions  
582 are a pyramid of linear and quadratic 3D Gabor wavelet filters that tile the stimulus at a  
583 variety scales, directions and temporal frequencies (see Figure 6a. The parameters that  
584 generate the set of filters were adapted and scaled to the tuning properties of mouse  
585 visual cortex. We estimate weights for 10 time-lags for each basis function to enable fitting  
586 of the temporal kernel. The weighted sum of the basis functions is passed to a  
587 parameterized soft-plus nonlinearity to ensure the model has only positive outputs. This  
588 quadratic model is thus akin to a highly regularized STA/STC analysis, but adapted to fit  
589 the full spatio-temporal receptive field using stimuli from the data set.

590 We estimated a sparse combination of basis functions for each neuron using a  
591 variant of threshold gradient descent<sup>32</sup>. Threshold gradient descent works just like gradient  
592 descent, except only basis functions whose gradients have magnitudes larger than some  
593 fractional threshold,  $t$ , of the largest gradient magnitude have their weights updated. All  
594 weights start at 0 and the descent is terminated using early stopping, i.e. it continues only  
595 if generalization performance on a stopping set improves. The threshold parameter, which  
596 can range from 0 to 1, controls the sparsity of the solution, with larger values returning  
597 sparse solutions. All models were fit with a threshold value of 0.8.

598 We modified the original algorithm in three ways to improve its performance on our  
599 data. First it was changed so that it updated the weights at all time lags for any basis  
600 function that exceeded threshold. This allowed the temporal kernel for each basis function  
601 to vary smoothly in time, rather than being sparse. Second, we maintained an active-set  
602 containing all weights that had ever been updated. At each iteration, any basis function  
603 whose gradient exceeded the threshold had its weight added to the active set, and then all  
604 weights in the active set were updated. This prevented oscillations during fitting. Third we  
605 used an adaptive step size to speed up training. The step size increased by a factor of 1.2  
606 at each iteration if generalization to the stopping set improved, and decreased by a factor  
607 of 0.5 if generalization worsened<sup>33</sup>.

608 All models were fit and tested in a nested six-fold cross-validation framework. We  
609 split the data into six sets each containing many 50 sample long continuous blocks from  
610 throughout the dataset. For each fold of cross validation, one set was used as a test set to  
611 evaluate the model and the remaining five were used to train a model. A model was  
612 trained by starting with five separate models, each trained on a different combination of  
613 four of the five training sets, with the remaining set functioning as the stopping set for that  
614 model. After fitting, the five models were averaged together to create a single model for  
615 making predictions on the test set. Reported model performance is the average  
616 performance on the test set across the six folds. Separate models were fit for the natural  
617 stimuli (movies and scenes) and artificial stimuli (drifting gratings, static gratings and  
618 locally sparse noise).

619 We define “simple” cells as neurons that exhibit linear receptive fields and  
620 “complex” cells as neurons that exhibit quadratic receptive fields. We assess the degree of  
621 “complexity” of each neuron by constructing a metric that is the ratio of total excitatory  
622 weight on quadratic basis functions to the total excitatory weight on all basis functions. A  
623 model that only has weights on quadratic basis functions would be 1 on this index, while a  
624 model that only has weights on linear basis functions would be 0 on this index.

625 The linear component of each model can be visualized directly, similar to a spike  
626 triggered average, as it is simply weights on pixels. To visualize the quadratic component,  
627 the weighted quadratic basis functions must first be converted into an equivalent matrix of  
628 second order terms. This matrix can then be analyzed by eigenvector decomposition,  
629 similar to spike triggered covariance.

630

### 631 SSM Analysis for comparison with convolutional neural networks

632 The comparison of representations to those of convolutional neural networks is  
633 performed via a similarity-of-similarity matrix analysis. To compare two representations,  
634 e.g. a model layer with the responses from Cux2, layer4, V1, we compute the Spearman  
635 correlation between the similarity matrices for each representation. The similarity matrix  
636 for a representation is computed by taking the Pearson correlation of the response across  
637 neurons or units in that representation for two images from the natural scene stimuli,  
638 including the grey screen condition, resulting in a 119x119 matrix for each representation.  
639 For the CNN, the response is just the set of outputs of a particular model layer. For the

640 neural responses, we use the trial average of the integrated event magnitude for the  
 641 interval during which a particular image was on screen. We compare only to the pooling  
 642 layers of VGG16 in the main text. A hierarchical clustering of the layers using the one  
 643 minus the similarity matrix to compute a distance generates six clusters one of which  
 644 consists of the input layer alone. The remaining clusters are the layers between and  
 645 including the successive pooling layers. Images were resized to (50,64) before CNN  
 646 responses were computed. Several different sizes from (50,64) to (400,512) in powers of  
 647 two did not yield substantially different results.

648 Statistical significance is determined by generating a null distribution for the SSM  
 649 correlation by creating 100 shuffles of the image labels for both representations and  
 650 computing the SSM correlation from that. The distribution of shuffles was fit to a Student's  
 651 T distribution and a p value was computed from that fit. Significance was considered at  
 652 the 0.005 level, with a Bonferroni correction for the number of comparisons across model  
 653 layers, cortical areas, cortical layers, and Cre lines.

654

#### 655 Population Overlap

656 Population overlap quantifies the extent to which the population of neurons that  
 657 responds to one stimulus set (e.g. locally-sparse noise) overlaps with the population of  
 658 neurons that responds to another stimulus set (e.g. static gratings). For each pair of  
 659 stimulus sets, the population overlap is defined as the number of neurons in an experiment  
 660 that were responsive to both stimulus sets divided by the number of neurons that were  
 661 successfully imaged for the entirety of both stimulus sets.

662 To place the observed population overlap in context, we defined an index of  
 663 population overlap in which 0.0 indicates the population overlap of statistically independent  
 664 populations, 1.0 indicates maximally-overlapping populations, and -1.0 indicates  
 665 minimally-overlapping populations. If  $f_1, f_2, f_{12}$  indicate the fraction of cells responsive to  
 666 stimulus set 1, stimulus set 2, and both stimulus sets 1 and 2, respectively, the population  
 667 overlap is calculated as follows.

$$668 \quad f_{12}^{min} = \max(0.0, f_1 + f_2 - 1.0)$$

$$669 \quad f_{12}^{max} = \min(f_1, f_2)$$

$$670 \quad f_{12}^{chance} = f_1 f_2$$

671

$$672 \quad PO = \begin{cases} \frac{f_{12} - f_{12}^{chance}}{f_{12}^{chance} - f_{12}^{min}}, & f_{12} < f_{12}^{chance} \\ \frac{f_{12} - f_{12}^{chance}}{f_{12}^{max} - f_{12}^{chance}}, & f_{12} \geq f_{12}^{chance} \end{cases}$$

673

674 Statistically independent populations have the property that whether or not a neuron  
 675 is responsive to one stimulus set provides no information about whether or not that neuron  
 676 is responsive to the other stimulus set. By definition, the population overlap of statistically

677 independent populations is equal to the product of the marginal fractions of neurons  
678 responsive to each stimulus set alone. An observed overlap greater than that expected for  
679 statistically independent populations indicates that a neuron that is responsive to one  
680 stimulus set is more likely than not to also be responsive to the other stimulus set. By  
681 contrast, an observed overlap less than that expected for statistically independent  
682 populations indicates that a neuron that is responsive to one stimulus set is more likely to  
683 be non-responsive than responsive to the other stimulus set.

684         The fraction of cells responsive to either stimulus set alone also constrains the range  
685 of possible values of population overlap. Maximum overlap occurs when all neurons  
686 responsive to one stimulus set are also responsive to the other stimulus set, which implies  
687 that the overlap can be no greater than the lesser of the two marginal fractions responsive.  
688 Conversely, minimum overlap occurs when the fewest neurons responsive to one stimulus  
689 set are also responsive to the other stimulus set, which implies that the overlap must be  
690 greater than zero when the sum of the marginal fractions responsive is greater than 1.0.



691 **References**

692

- 693 1. Madisen, L. *et al.* A robust and high-throughput Cre reporting and characterization  
694 system for the whole mouse brain. *Nat. Neurosci.* **13**, 133–140 (2010).
- 695 2. Madisen, L. *et al.* Transgenic mice for intersectional targeting of neural sensors and  
696 effectors with high specificity and performance. *Neuron* **85**, 942–958 (2015).
- 697 3. Mayford, M. *et al.* Control of memory formation through regulated expression of a  
698 CaMK11 transgene. *Science (80-. )*. **274 IS-**, 1678-1683 EP- (1996).
- 699 4. Daigle, T. L. *et al.* A suite of transgenic driver and reporter mouse lines with  
700 enhanced brain cell type targeting and functionality. (2017). doi:10.1101/224881
- 701 5. Franco, S. J. *et al.* Fate-restricted neural progenitors in the mammalian cerebral  
702 cortex. *Science (80-. )*. **337**, 746–749 (2012).
- 703 6. Harris, J. A. *et al.* Anatomical characterization of Cre driver mice for neural circuit  
704 mapping and manipulation. *Front. Neural Circuits* **8**, 1–16 (2014).
- 705 7. Gorski, J. a *et al.* Cortical excitatory neurons and glia, but not GABAergic neurons,  
706 are produced in the Emx1-expressing lineage. *J. Neurosci.* **22**, 6309–6314 (2002).
- 707 8. Taniguchi, H. *et al.* A Resource of Cre Driver Lines for Genetic Targeting of  
708 GABAergic Neurons in Cerebral Cortex. *Neuron* **71**, 995–1013 (2011).
- 709 9. Dhillon, H. *et al.* Leptin directly activates SF1 neurons in the VMH, and this action  
710 by leptin is required for normal body-weight homeostasis. *Neuron* **49**, 191–203  
711 (2006).
- 712 10. Gerfen, C. R., Paletzki, R. & Heintz, N. GENSAT BAC cre-recombinase driver lines  
713 to study the functional organization of cerebral cortical and basal ganglia circuits.  
714 *Neuron* **80**, 1368–1383 (2013).
- 715 11. Guo, C. *et al.* Fezf2 expression identifies a multipotent progenitor for neocortical  
716 projection neurons, astrocytes, and oligodendrocytes. *Neuron* **80**, 1167–1174  
717 (2013).
- 718 12. Gong, S. *et al.* Targeting Cre Recombinase to Specific Neuron Populations with  
719 Bacterial Artificial Chromosome Constructs. *J. Neurosci.* **27**, 9817–9823 (2007).
- 720 13. Goldey, G. J. *et al.* Removable cranial windows for long-term imaging in awake  
721 mice. *Nat. Protoc.* **9**, 2515–2538 (2014).
- 722 14. Kalatsky, V. A. & Stryker, M. P. New paradigm for optical imaging: Temporally  
723 encoded maps of intrinsic signal. *Neuron* **38**, 529–545 (2003).
- 724 15. Marshel, J. H., Garrett, M. E., Nauhaus, I. & Callaway, E. M. Functional  
725 specialization of seven mouse visual cortical areas. *Neuron* **72**, 1040–1054 (2011).
- 726 16. Garrett, M. E., Nauhaus, I., Marshel, J. H. & Callaway, E. M. Topography and Areal  
727 Organization of Mouse Visual Cortex. *J. Neurosci.* **34**, 12587–12600 (2014).
- 728 17. Peirce, J. W. Generating Stimuli for Neuroscience Using PsychoPy. *Front.*  
729 *Neuroinform.* **2**, 10 (2008).
- 730 18. Peirce, J. W. PsychoPy-Psychophysics software in Python. *J. Neurosci. Methods*  
731 **162**, 8–13 (2007).

- 732 19. Martin, D., Fowlkes, C., Tal, D. & Malik, J. A database of human segmented natural  
733 images and its application to evaluating segmentation algorithms and measuring  
734 ecological statistics. *Proc. Eighth IEEE Int. Conf. Comput. Vision. ICCV 2001* **2**,  
735 416–423 (2001).
- 736 20. van Hateren, J. H. & van der Schaaf, a. Independent component filters of natural  
737 images compared with simple cells in primary visual cortex. *Proc. Biol. Sci.* **265**,  
738 359–366 (1998).
- 739 21. Olmos, A. & Kingdom, F. A. A. A biologically inspired algorithm for the recovery of  
740 shading and reflectance images. *Perception* **33**, 1463–1473 (2004).
- 741 22. Welles, O. *Touch of Evil*. (Universal - International, 1958).
- 742 23. Oh, S. W. *et al.* A mesoscale connectome of the mouse brain. *Nature* **508**, 207–214  
743 (2014).
- 744 24. Jones, E., Oliphant, T., Peterson, P. & Others. SciPy.org. *SciPy: Open source  
745 scientific tools for Python2* (2001).
- 746 25. McKinney, W. & Team, P. D. Pandas - Powerful Python Data Analysis Toolkit.  
747 *Pandas - Powerful Python Data Anal. Toolkit* (2015).
- 748 26. Hunter, J. D. Matplotlib: A 2D graphics environment. *Comput. Sci. Eng.* (2007).  
749 doi:10.1109/MCSE.2007.55
- 750 27. Vinje, W. E. & Gallant, J. L. Sparse Coding and Decorrelation in Primary Visual  
751 Cortex During Natural Vision. *Science (80-. )*. **287**, 1273–1276 (2000).
- 752 28. Schoppe, O., Harper, N. S., Willmore, B. D. B., King, A. J. & Schnupp, J. W. H.  
753 Measuring the Performance of Neural Models. *Front. Comput. Neurosci.* **10**, 1–11  
754 (2016).
- 755 29. Kay, K. N., Naselaris, T., Prenger, R. J. & Gallant, J. L. Identifying natural images  
756 from human brain activity. *Nature* (2008). doi:10.1038/nature06713
- 757 30. Nishimoto, S. *et al.* Reconstructing visual experiences from brain activity evoked by  
758 natural movies. *Curr. Biol.* (2011). doi:10.1016/j.cub.2011.08.031
- 759 31. Willmore, B. D. B., Prenger, R. J. & Gallant, J. L. Neural Representation of Natural  
760 Images in Visual Area V2. *J. Neurosci.* (2010). doi:10.1523/JNEUROSCI.4099-  
761 09.2010
- 762 32. Friedman, J. H. & Popescu, B. E. Predictive learning via rule ensembles. *Ann. Appl.  
763 Stat.* (2008). doi:10.1214/07-AOAS148
- 764 33. Riedmiller and Braun - 1992 - RPROP - A Fast Adaptive Learning Algorithm.  
765  
766

# Supplemental Figure 1

**a**

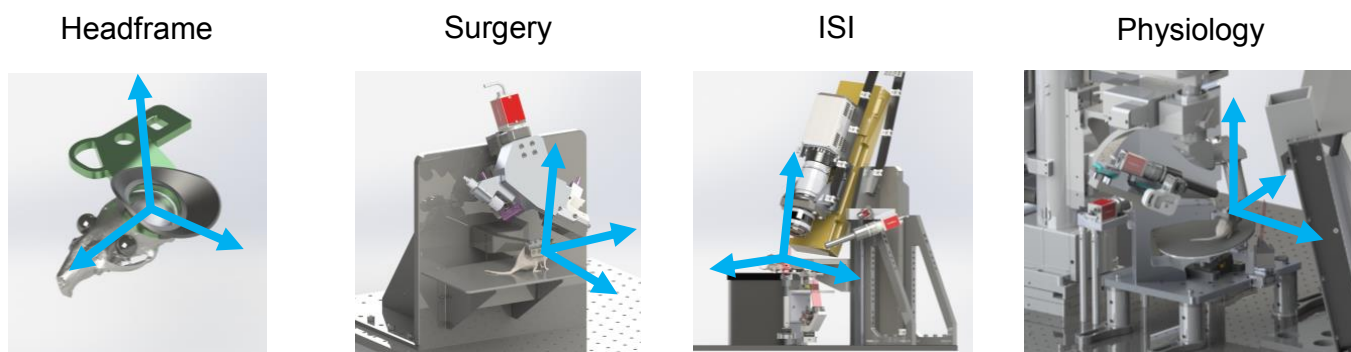

**b**

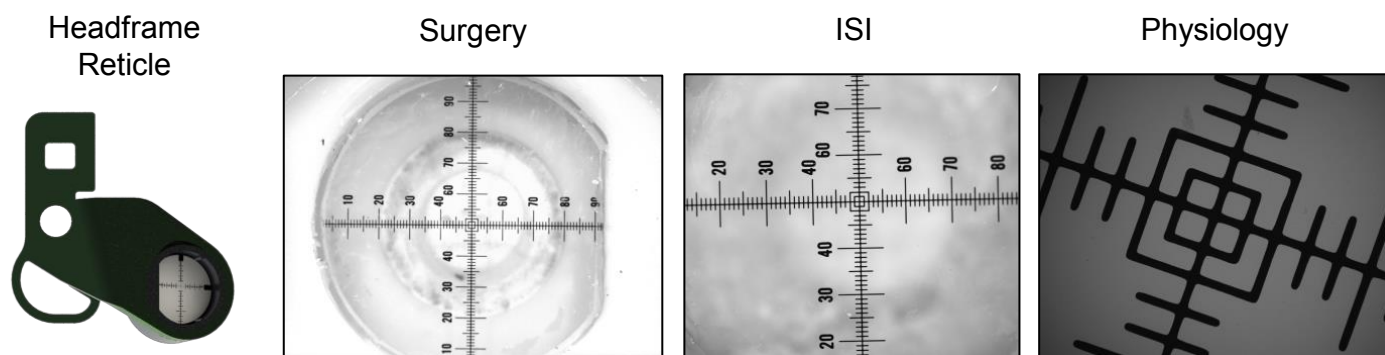

**c**

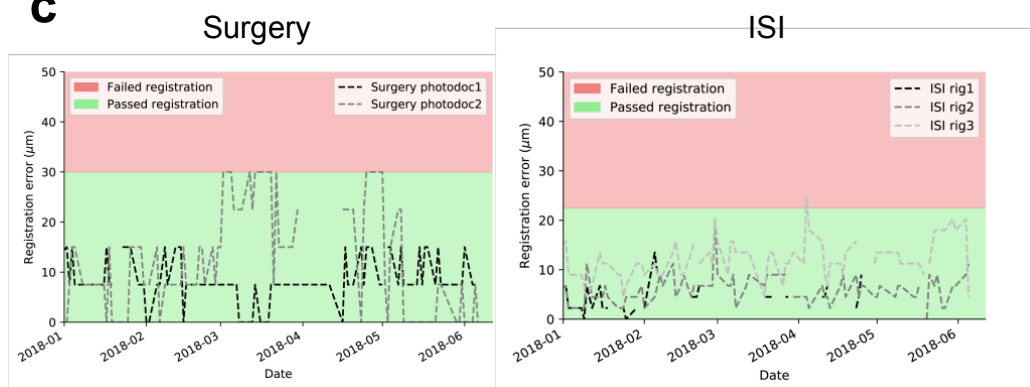

767 Supplemental Figure 1: Cross-platform registration for pipeline data  
768 collection

769 All data collection platforms are precisely designed and built around the headframe  
770 geometry and coordinate space (a). A registration artifact (a headframe with reticle glued  
771 inside the well) defines the imaging coordinate system (b). All experimental systems  
772 (including surgical photo-documentation, ISI, and 2P optical physiology microscopes) are  
773 calibrated so they produce data that is referenced within the imaging coordinate system.  
774 Registration integrity is monitored by routine measurement of a registration artifact (6  
775 months of data shown in (c)). If the registration parameters exceed tight control limits the  
776 system is re-calibrated.

# Supplemental Figure 2

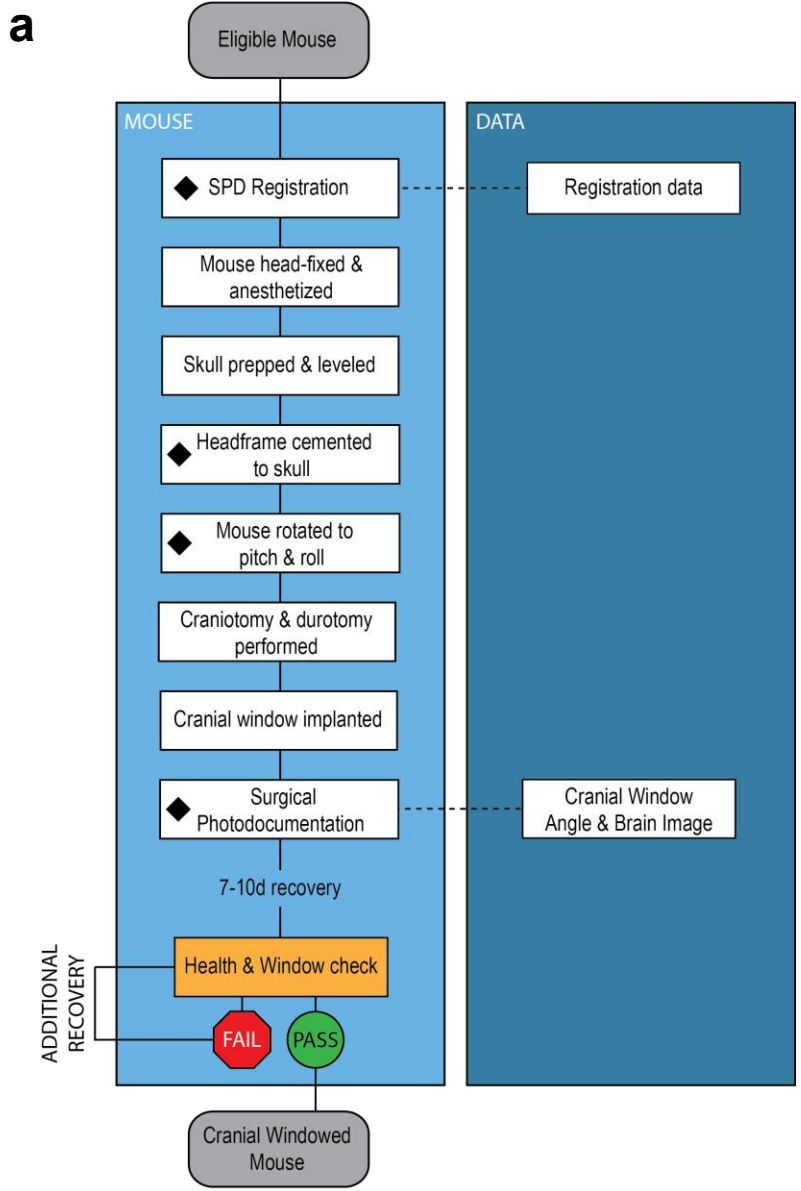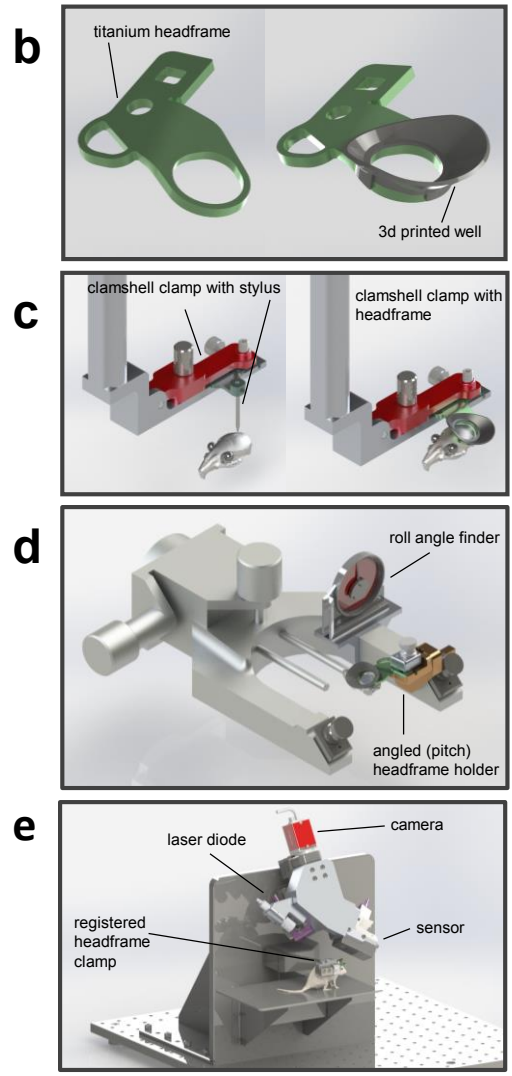

◆ Associated Custom Tooling

Quality Control Step

777 Supplemental Figure 2: A standardized workflow for headframe and  
778 cranial window placement

779 The cranial window surgery consists of procedural and data collection steps (a). The  
780 surgery is standardized across mice through precise placement of a registerable titanium  
781 headframe with objective well (b). Reproducible placement of the headframe is achieved  
782 using a suite of custom tooling that ensures precise placement of the headframe with  
783 respect to lambda (c), reproducible cranial window angles across mice (d), and quality  
784 control tracking of surgical outcome, cranial window angle and brain health (e).

785

# Supplemental Figure 3

**a**

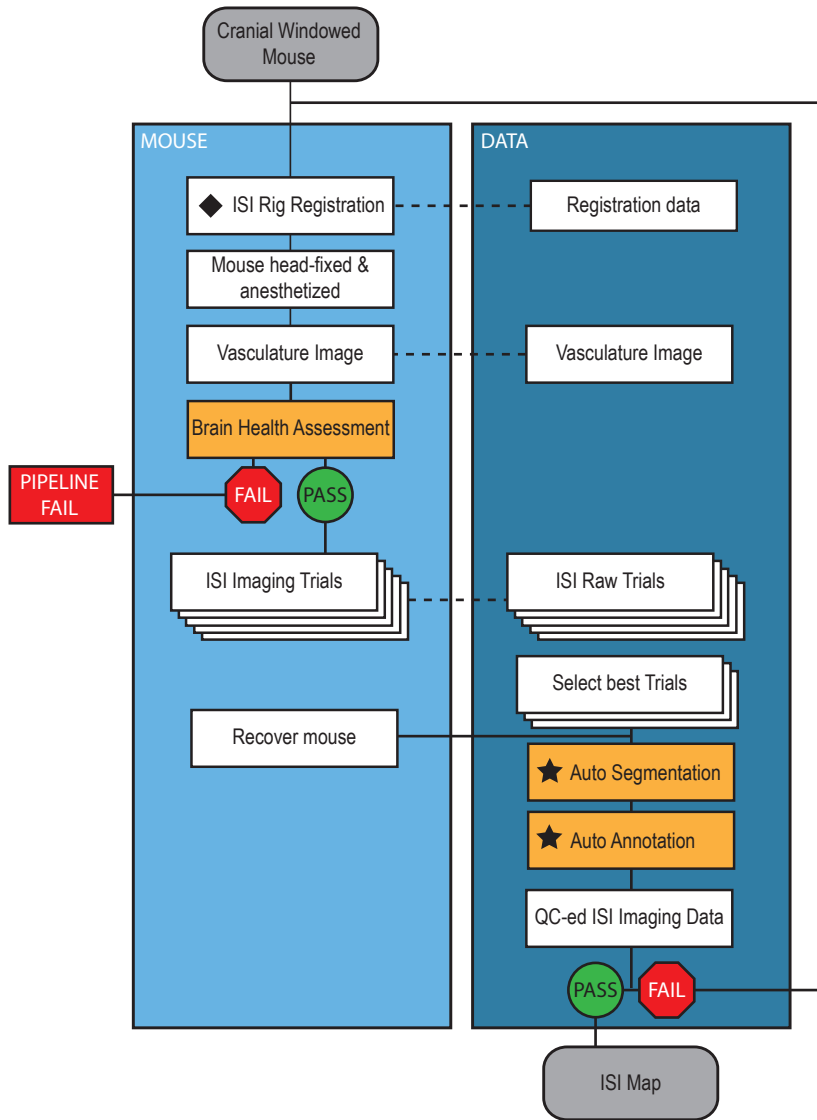

- ◆ Associated Custom Tooling
- ★ Associated Custom Software
- Quality Control Step

**b**

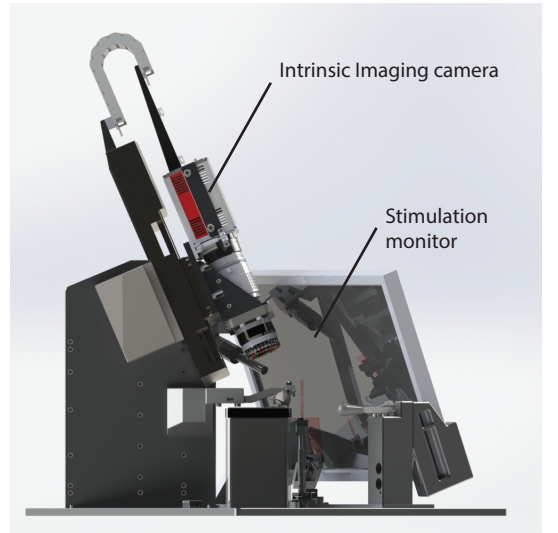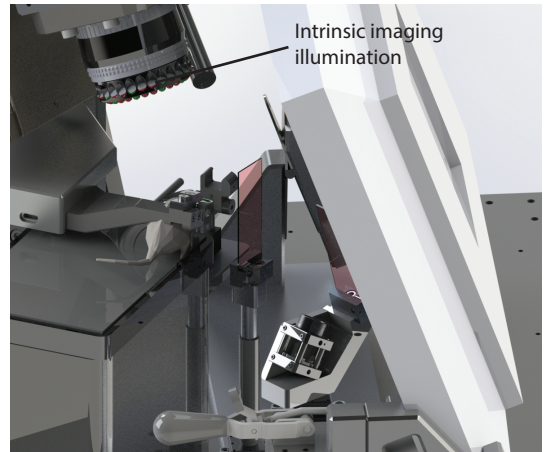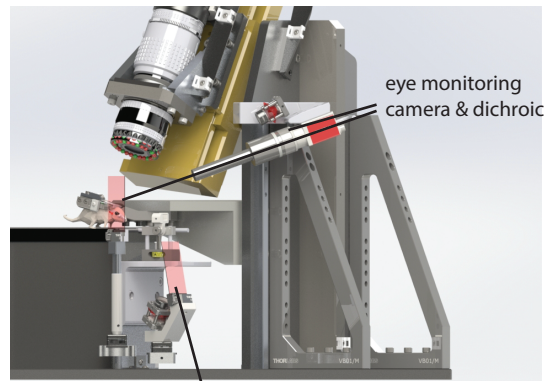

eye monitoring illumination

REPEAT SESSION

786 Supplemental Figure 3: A standardized intrinsic imaging experimental  
787 workflow to map the visual cortex at scale

788 (a) The intrinsic imaging consists of procedural and data collection steps. Data is  
789 standardized using custom tools (b) and data quality metrics and control procedure. (b)  
790 The Visual cortex is illuminated via custom LED rings positioned around the imaging  
791 objective (middle) and the fluctuation in light reflection is imaged using an imaging camera  
792 (top). Periodic stimuli presented on the stimulation screen allowed to map individual brain  
793 areas. (bottom) A set of camera allowed to monitor eye position in anesthetized mice.

794



# Supplemental Figure 4

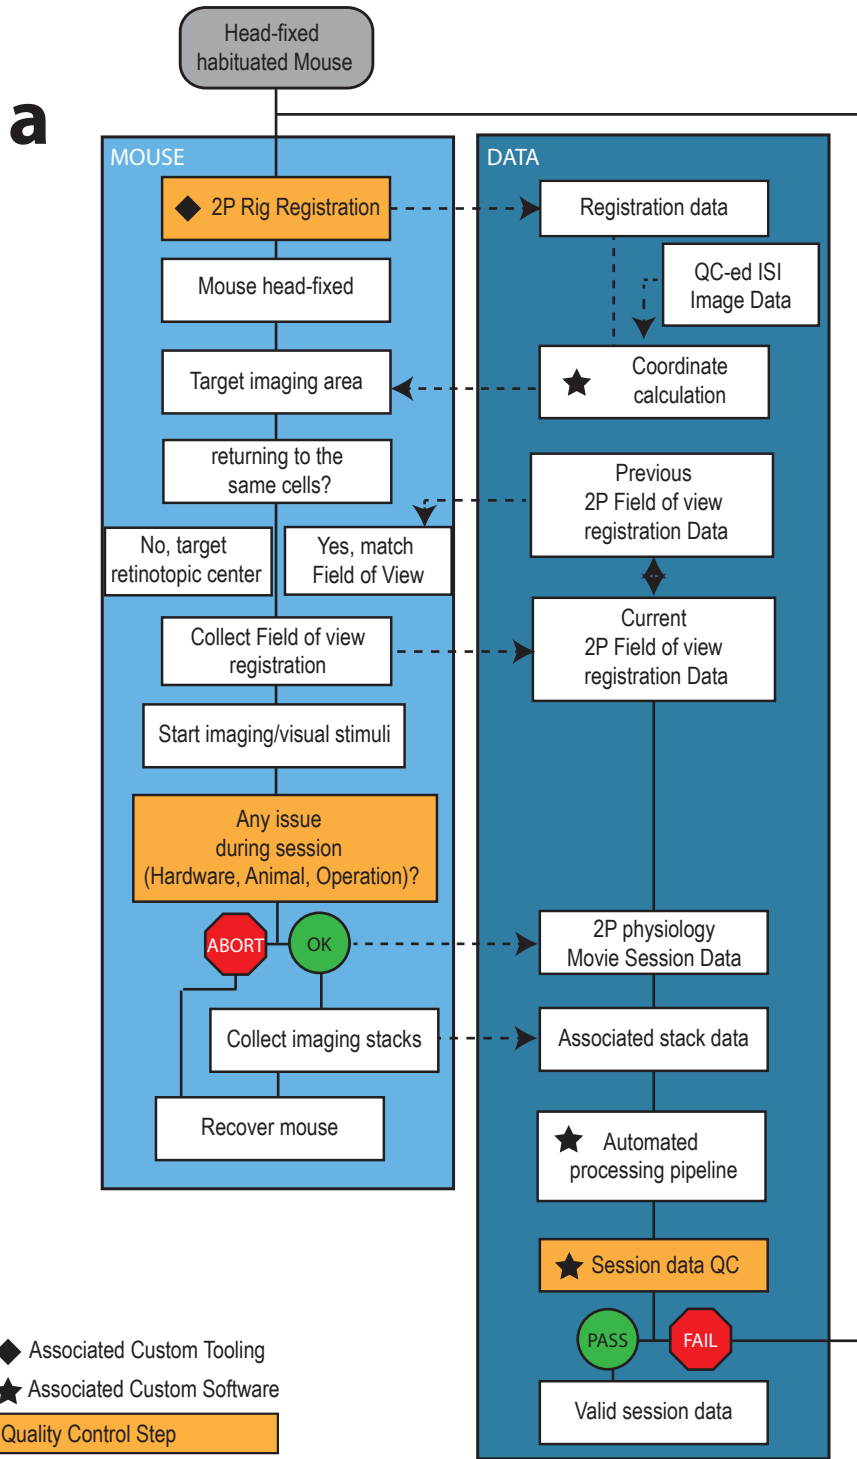

**b**

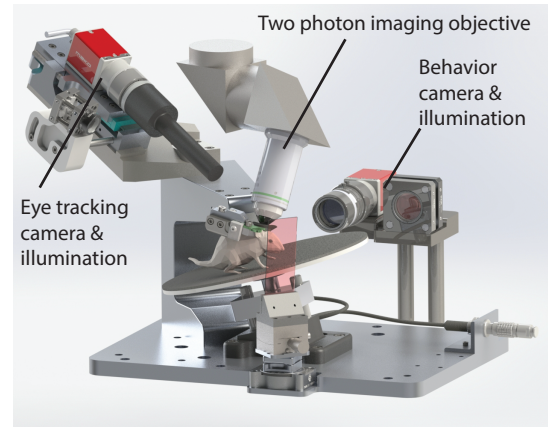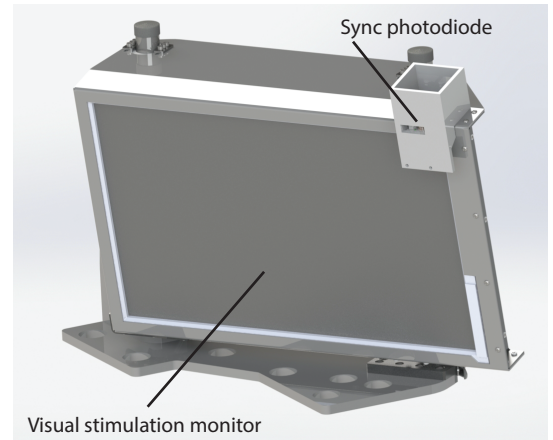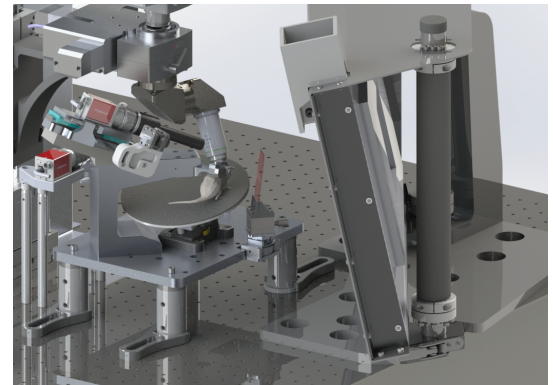

REPEAT SESSION

795 Supplemental Figure 4: A standardized 2-photon calcium imaging  
796 experimental workflow

797 (a) Two photon calcium imaging consists of procedural and data collection steps  
798 standardized using a formal experimental workflow. (b-top) Mice are head-fixed using  
799 custom behavioral hardware and monitored thanks to behavior and eye tracking cameras.  
800 (b-bottom) Visual stimuli are presented on a stimulation screen positioned reliably from  
801 session to session. (b-middle) Visual stimulation timing is monitored using a photodiode  
802 positioned on top of the screen for every experiment. The experimental workflow  
803 integrated tightly experimental procedures with QC metrics and any experimental that do  
804 not meet our standardized criteria (see Supplemental Figure 8) is re-attempted.

805

Supplemental Figure 5

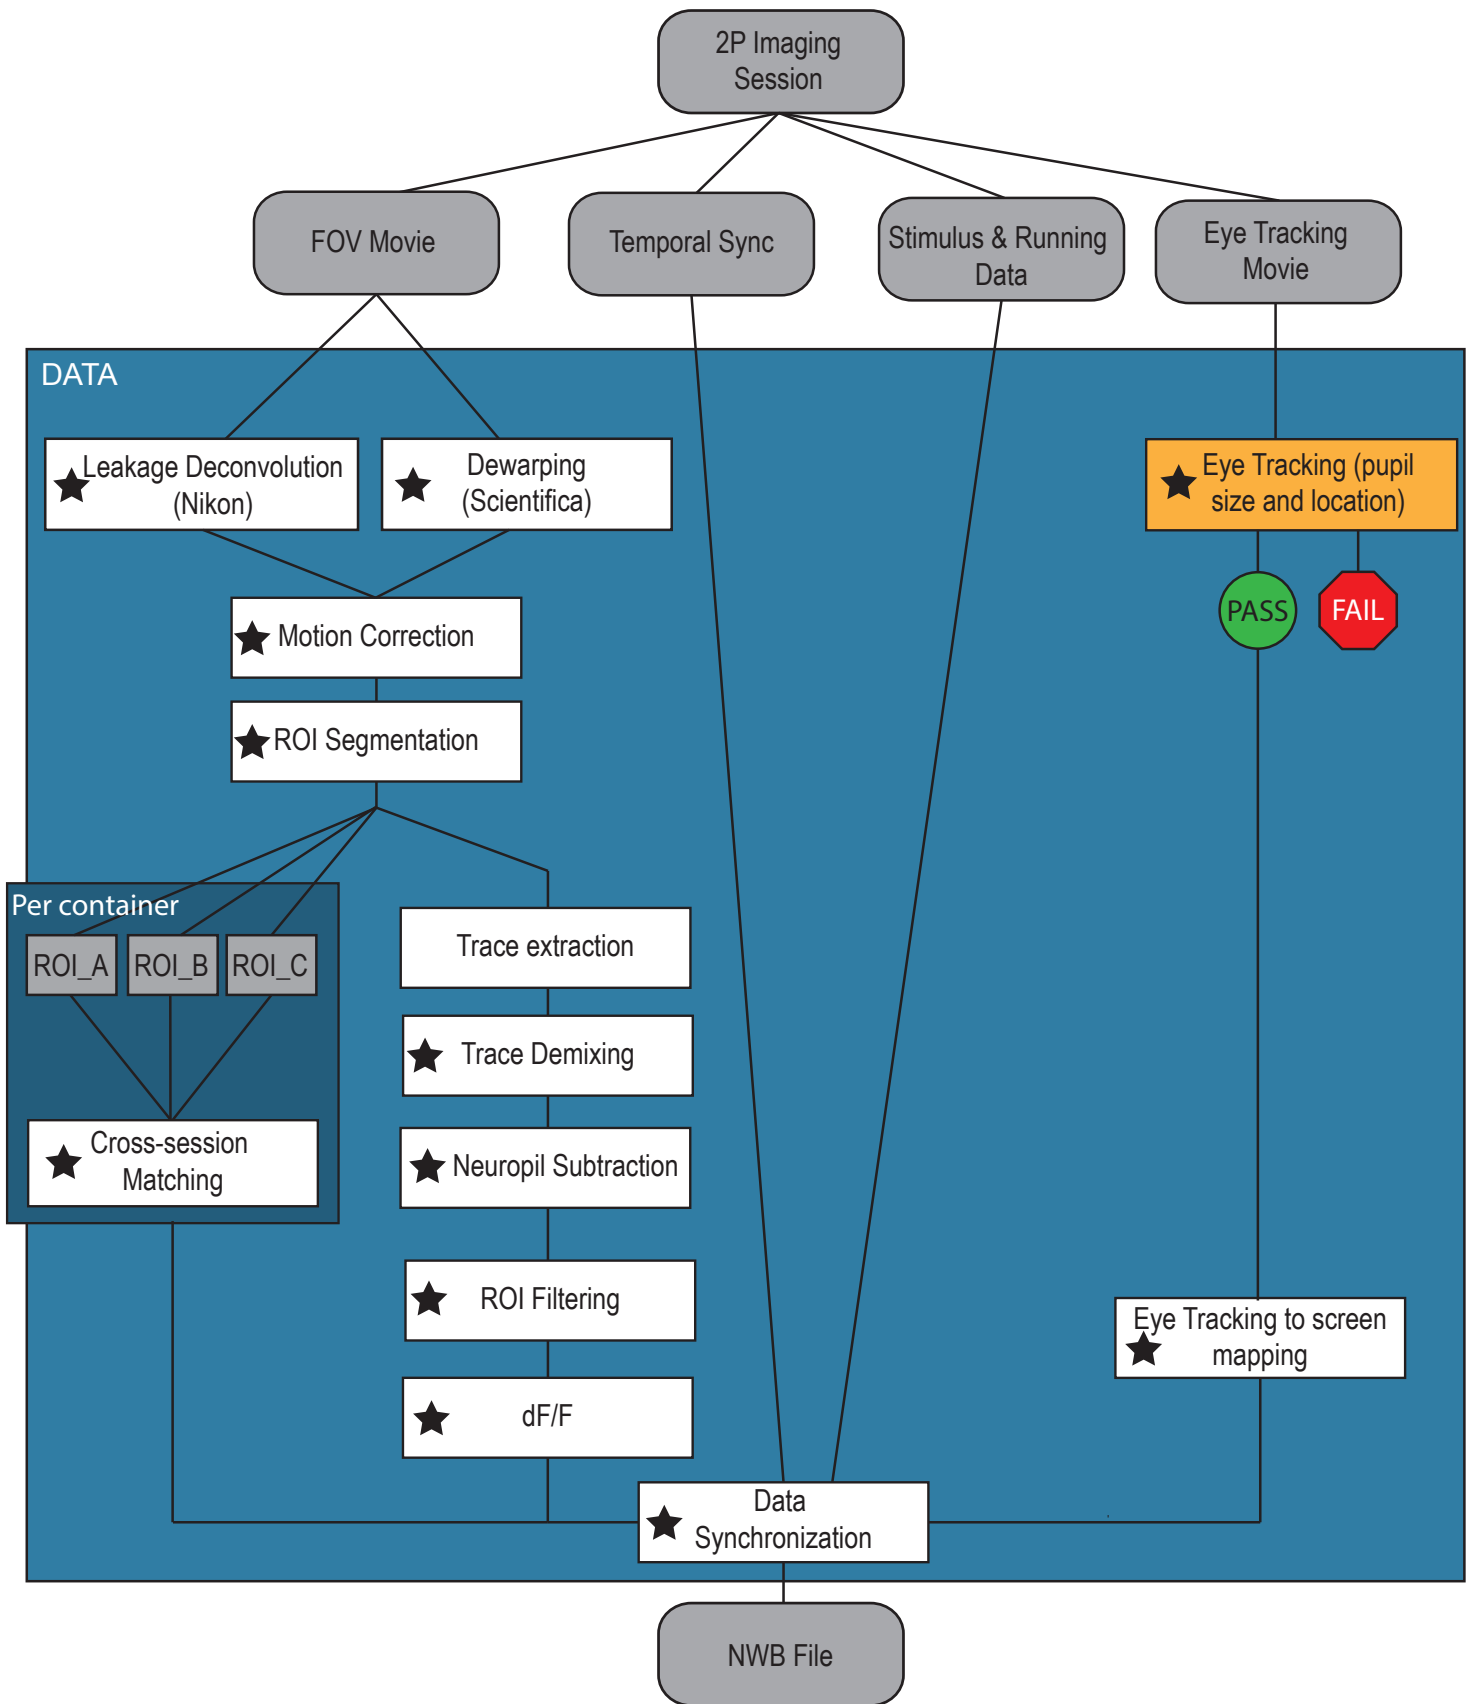

- ◆ Associated Custom Tooling
- ★ Associated Custom Software
- Quality Control Step

806 **Supplemental Figure 5: Image processing workflow**

807 In vivo 2-photon imaging data is processed using a standardized pipeline. Calcium movies  
808 are motion corrected and segmented using an automated segmentation algorithm. Within  
809 each session, the traces are extracted from the identified ROI, and overlapping ROIs  
810 demixed. Across all three imaging sessions in a single experiment, the segmented ROIs  
811 are matched across sessions. Following the matching step, ROIs are filtered to select only  
812 somatic masks, neuropil contamination is subtracted, and  $\Delta F/F$  is computed within each  
813 session. These traces are aligned to the stimulus, running, and eye tracking data using the  
814 temporal sync that was recorded during the experiment. The eye tracking movie is  
815 processed (see Supplemental Figure 12) and aligned to visual space.

816

# Supplemental Figure 6

**a**

Post-mortem brain health assessment

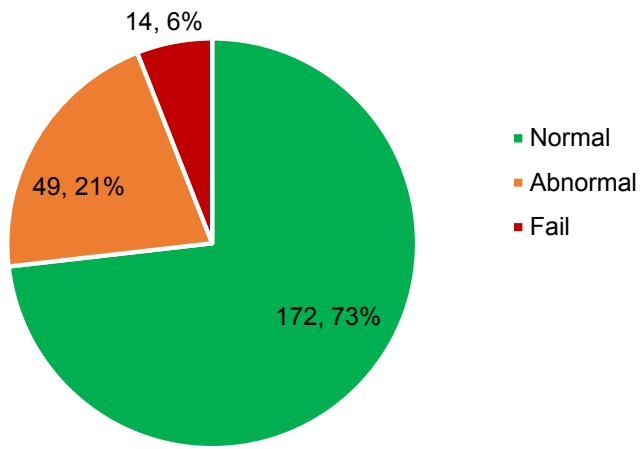

**b**

Normal

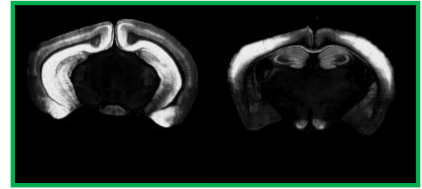

Abnormal

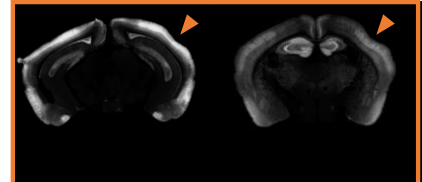

Fail

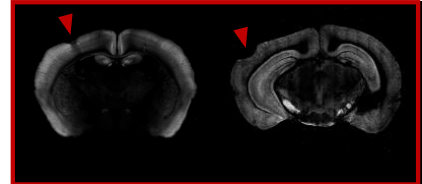

817 **Supplemental Figure 6: Brain health assessment**

818 (a) We observed brain abnormalities in approximately 27% of the 235 mice that completed  
819 the experimental workflow. Abnormalities were identified during post-mortem histological  
820 analysis of the tissue (examples shown in (b)) and had no observable behavioral  
821 manifestation during the life of the mouse. Additionally, analysis of a random subset of  
822 datasets obtained from mice with abnormalities revealed no differences in physiological  
823 responses. In most cases the abnormalities either occurred in the contralateral  
824 hemisphere or did not result in observable disruption to the cortical laminar structure  
825 (Abnormal). In rarer cases, the abnormalities 1) occurred under or adjacent to the cranial  
826 window, 2) disrupted the cortical layers, or 3) resulted in necrosis. In these cases,  
827 experimental datasets from these mice were excluded from analysis (Fail). (b) Examples  
828 of Normal, Abnormal and Failed brains.

829

830

# Supplemental Figure 7

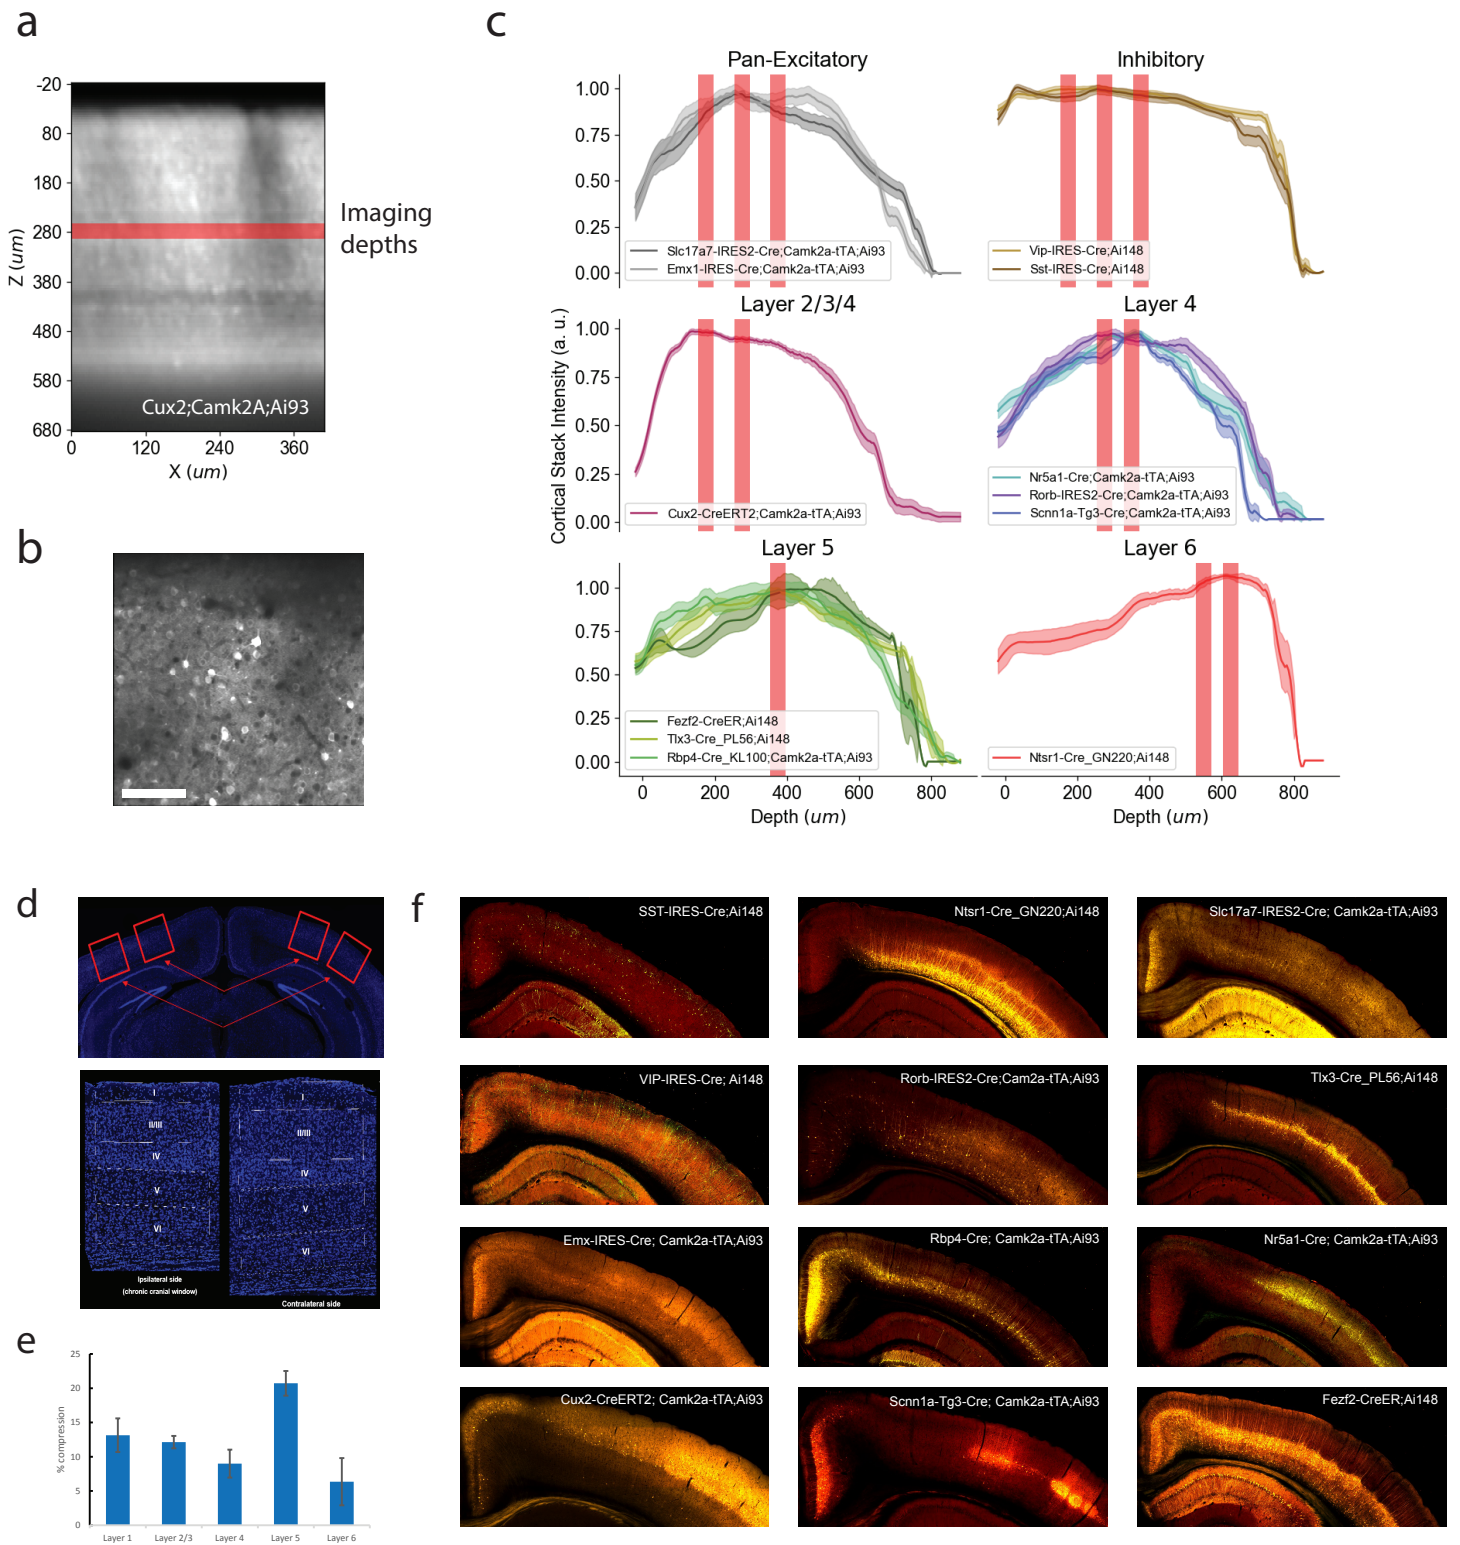

831 Supplemental Figure 7: Quantification of cortical layer expression  
832 levels across all transgenic mice for mice implanted with cortical glass  
833 windows

834

835 (a) Side view projection (XZ) of a single cortical stack acquired using two photon  
836 imaging. All experimental session were associated with such a cortical stack. Red bar  
837 denotes imaging depth shown in (b). Scale bar in (b) = 100  $\mu\text{m}$ . (c) Distribution of labelling  
838 intensity across all cortical stacks acquired in V1 for all imaged cre-lines. Red bars  
839 denotes imaging depths used in each line. (d) Brain compression was quantified using  
840 DAPI staining and confocal imaging of entire coronal sections. Cortical layers were  
841 annotated and their thickness measured for both the ipsi-lateral and contra-lateral side. (e)  
842 Distribution of cortical thickness ratio for all 6 cortical layers between the ipsi-lateral and  
843 contra-lateral side. (f) Example expression distribution of all cre-lines as shown on coronal  
844 sections imaged with serial two photon imaging.

845

846



# Supplemental Figure 8

**a**

| QC evaluation                | Metric(s)                                                                  | Threshold(s)                                                      | Notes                                                                         |
|------------------------------|----------------------------------------------------------------------------|-------------------------------------------------------------------|-------------------------------------------------------------------------------|
| z-drift                      | Z distance between start and end of physiological movie                    | 10 $\mu\text{m}$                                                  | Measured using cross-correlation between movie plane and a local z-stack      |
| Animal stress                | Presence of foam over the eye, general animal stress                       | Foam covering pupil                                               | Evaluated using eye tracking movie, body posture movie and general handling   |
| Cell matching                | Subjective evaluation of matched field of view between consecutive session | ~ more than 50 % cells matching                                   |                                                                               |
| Wheel rotation failure       | Wheel rotation uncorrelated with behavior movie;                           |                                                                   |                                                                               |
| Interictal events            | Presence of discontinuous spikes in wheel data                             |                                                                   |                                                                               |
| Laser damage                 | Width and size of whole field calcium events                               | size larger than 30 % $\Delta F/F$ , width between 100 and 300 ms |                                                                               |
| Bleaching and loss of signal | Number of discontinuous cellular compartments appearing between sessions   | >0                                                                |                                                                               |
| Abnormal gcamp expression    | Average fluorescence from start to end of session                          | 20% drop in baseline intensity                                    |                                                                               |
| Calcium physiology syncing   | Depth profile of gcamp                                                     | Any abnormal pattern                                              | Evaluated by comparing to reference z stack data                              |
| Eye tracking syncing         | Number of dropped frames                                                   | 1 for Nikon, 60 for Scientifica                                   |                                                                               |
| Visual stimulus syncing      | Number of long frames                                                      | 60 frames                                                         | Frame duration is plotted over time and number of abnormal frames are tracked |
| Saturation                   | Number of saturated pixels                                                 | 1000 pixels                                                       |                                                                               |
| Laser alignment stability    | Power at objective (mW)                                                    | >10% change                                                       | Trigger maintenance or evaluation of rig                                      |

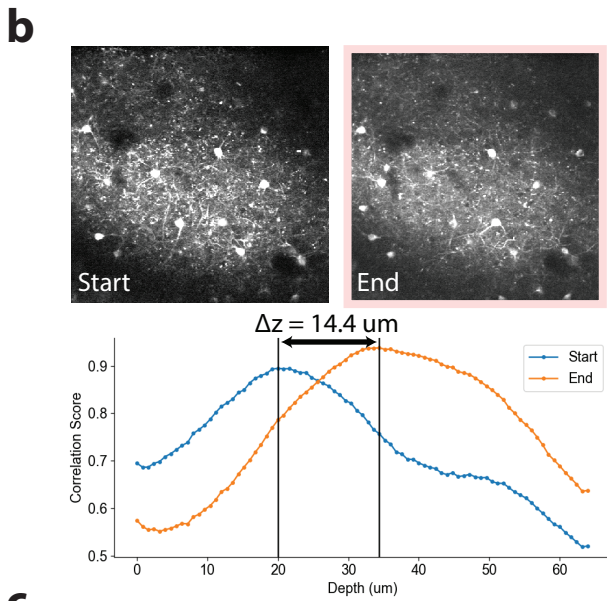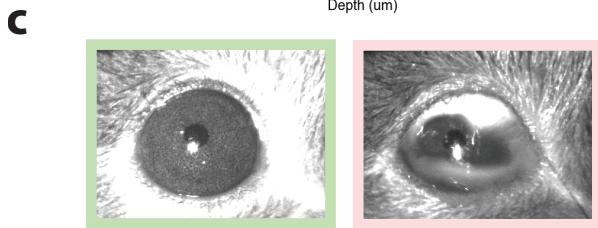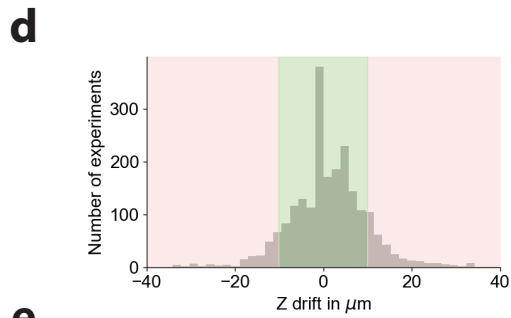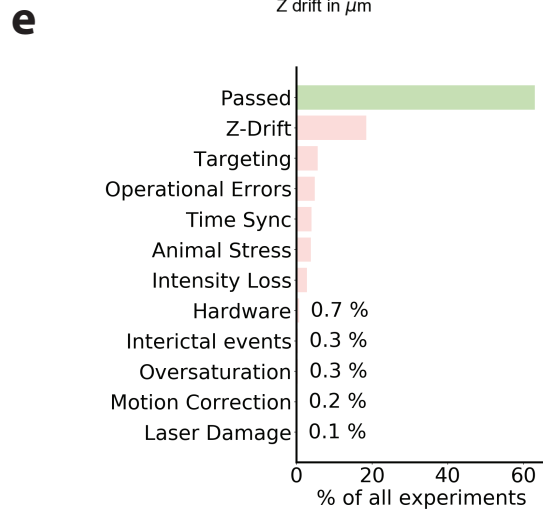

847 Supplemental Figure 8: 2-photon quality control metrics used for  
848 Quality Control (QC)

849

850 (a) Table of metrics used to validate experiment collected in two photon imaging. (b)  
851 Example images at the onset and end of a session showcasing excessive z-drift ( $>10\ \mu\text{m}$ ).  
852 Bottom panel in (b) shows the correlation score of all images in a local 60um z-stack with  
853 the onset and end image shown at the top. The peak was used as a measure of the actual  
854 z-position. (c) Example eye tracking data showing passing (green) and failing (red) signs  
855 of stress. (d) Distribution of z-drift across both passed and failed experiments. Green and  
856 red areas indicate failure threshold. (e) Distribution of all experimental failures for all  
857 individual sessions collected on the 2 photon imaging pipeline.

858

# Supplemental Figure 9

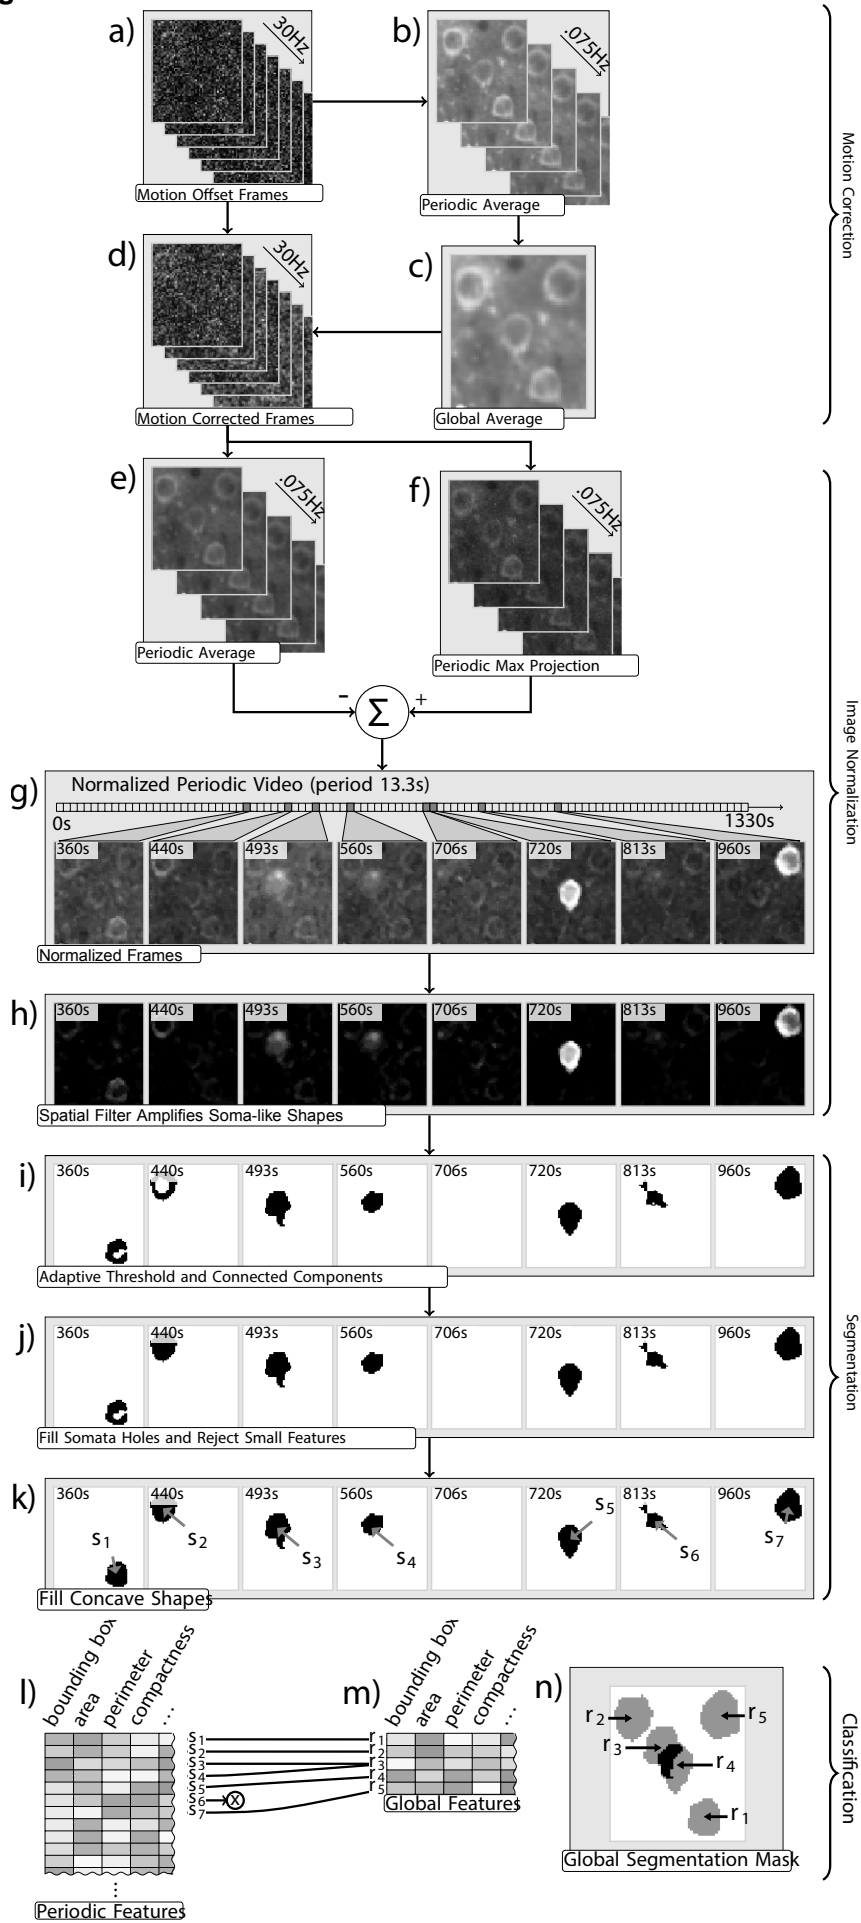

859 **Supplemental Figure 9: Image processing pipeline**

860 (a) Uncorrected movie. (b) Periodic average of 400-frame set. (c) Global average frame  
861 computed by registering the periodic averages together. (d) Motion corrected movie,  
862 aligned to the global average, used for downstream processing. (e) Periodic average  
863 frame from full motion corrected movie subtracted from (f) periodic maximum projection  
864 frame creates (g) normalized periodic frames. Periodic frames after (h) spatial filtering, (i)  
865 adaptive thresholding, and morphological operations (j, k). Features of each ROI mask  
866 identified in each period are computed (l). Heuristic decisions combine duplicate masks  
867 and label non-somatic masks for filtering (m), yielding the final ROI masks (n).

868

# Supplemental Figure 10

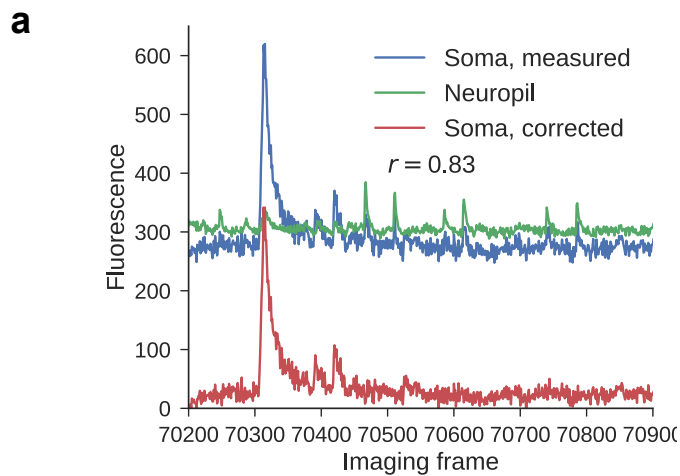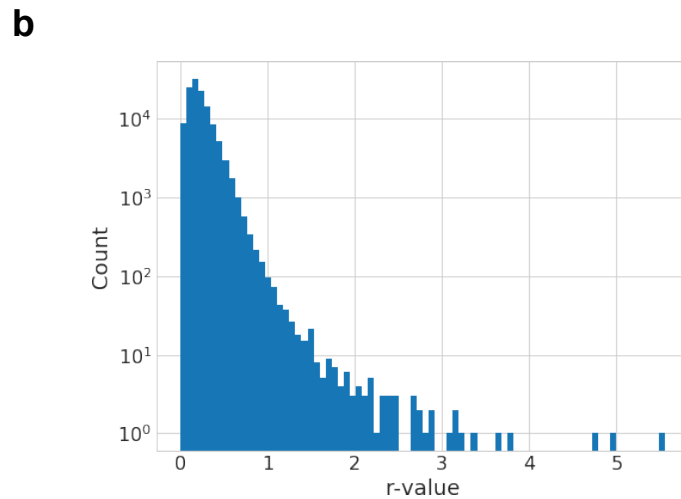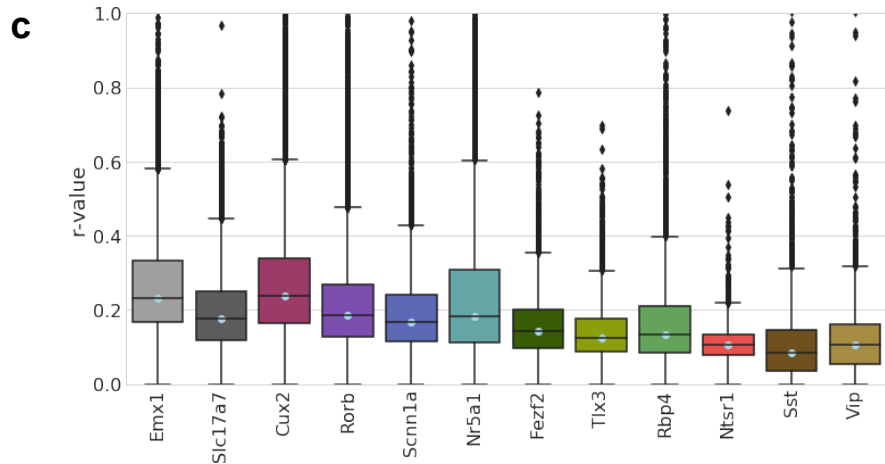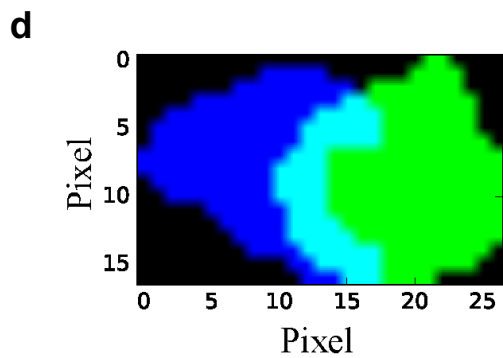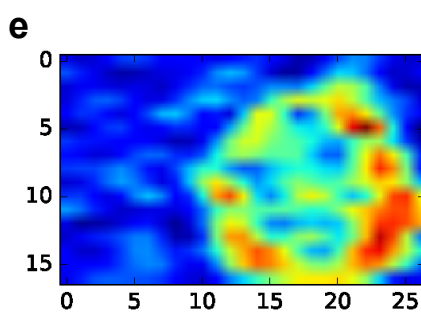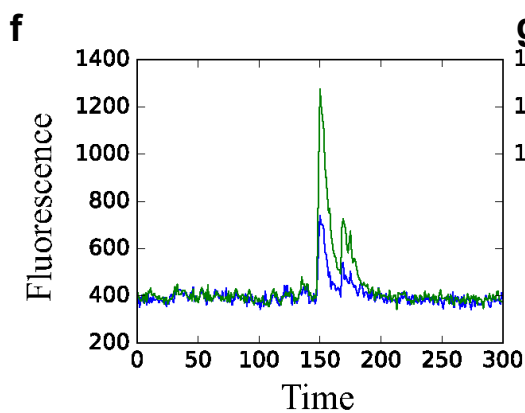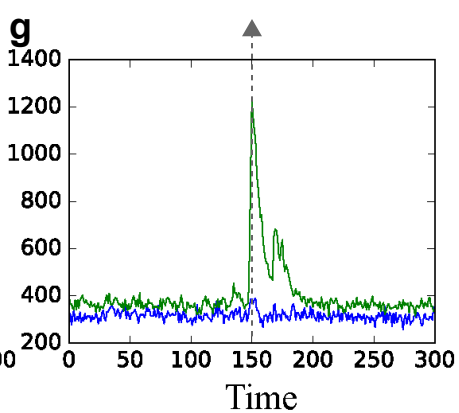

869 Supplemental Figure 10: Neuropil subtraction and demixing

870 (a) Example of neuropil subtraction showing somatic fluorescence, neuropil fluorescence  
871 and the corrected trace. (b) Histogram of computed r-values for all cells in the dataset. (c)  
872 Distributions of r-values for each Cre line. (d) Example of two overlapping ROIs (blue and  
873 green, with overlapping pixels in cyan). (e) Non-uniform distribution of fluorescence across  
874 a ROI, used for demixing. (f) Raw fluorescence traces from each ROI, centered on the  
875 time point in e. (g) Demixed traces for each ROI, centered on the time point in e.

876

877

# Supplemental Figure 11

## Emx1-Ai93

a

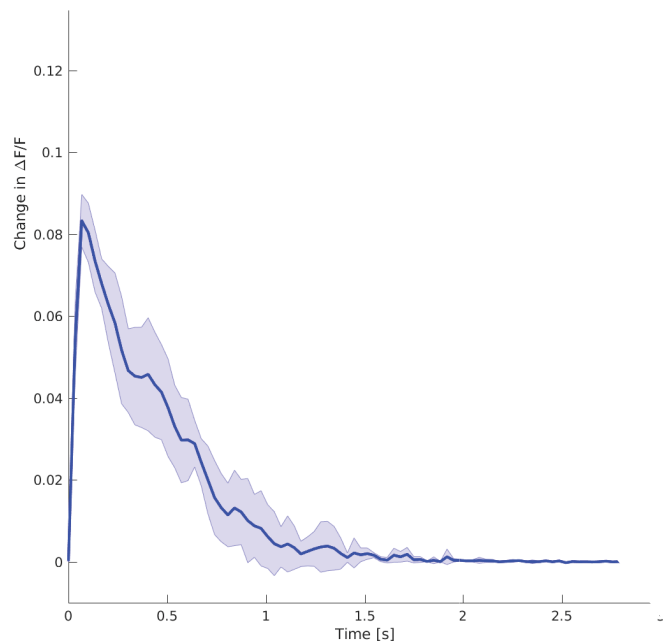

## Cux2-Ai93

b

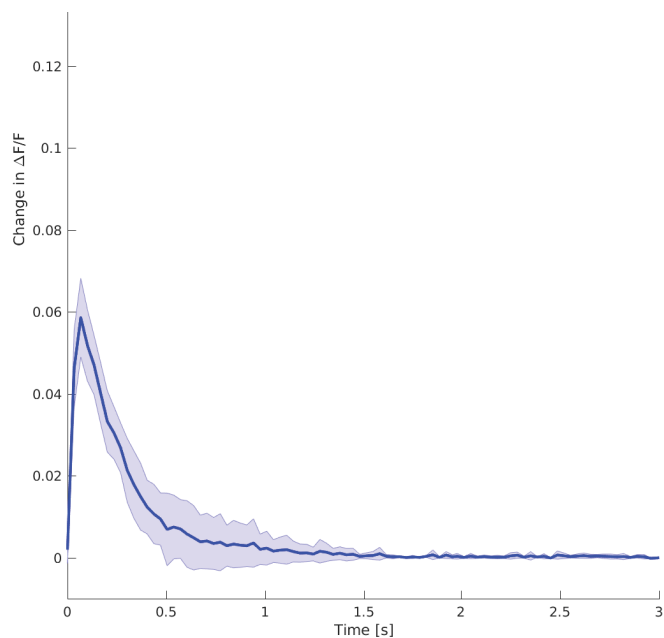

c

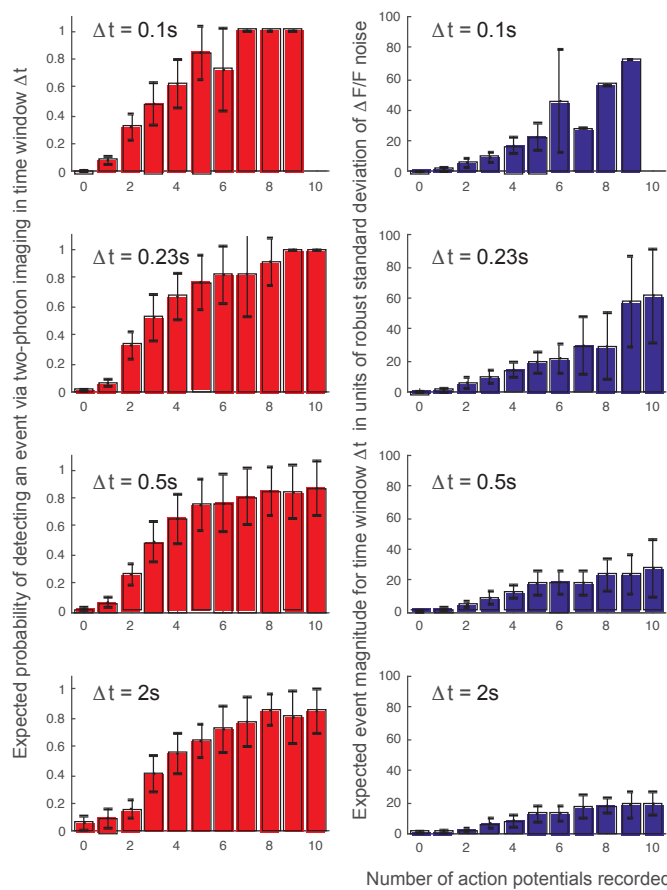

d

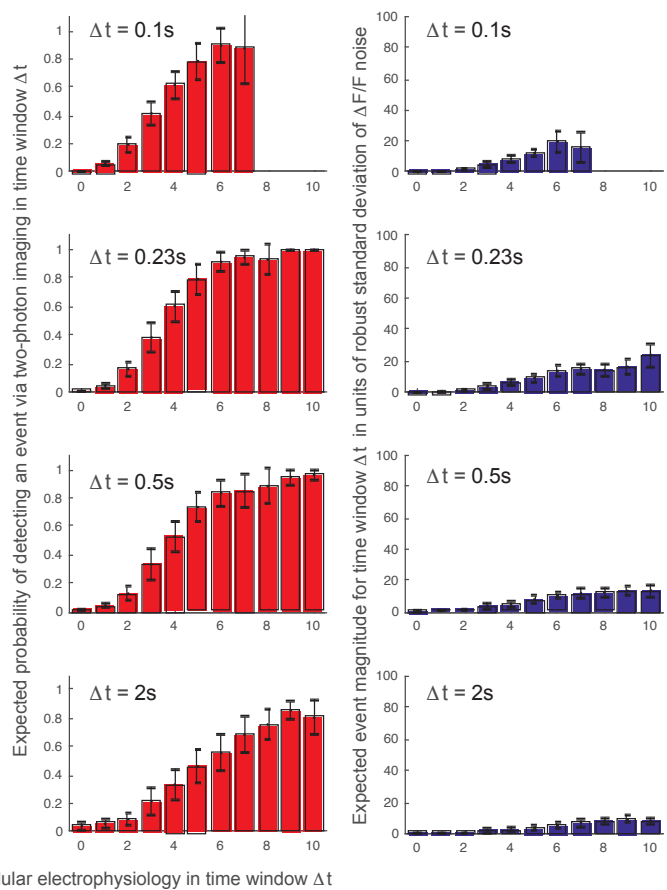

Number of action potentials recorded via juxtacellular electrophysiology in time window  $\Delta t$

878 Supplemental Figure 11: Evaluation of Event Detection

879 (a) Single-spike calcium response extracted from calcium imaging data acquired  
880 simultaneously with juxtacellular electrophysiology *in vivo* (15 cells in Emx1-Ai93 mice). (b)  
881 Single-spike calcium response extracted from calcium imaging data acquired  
882 simultaneously with juxtacellular electrophysiology *in vivo* (20 cells in Cux2-Ai93 mice). (c)  
883 The red bar graphs indicate the expected probability of detecting an event via L0 event  
884 detection (y-axis) as a function of the number of action potentials juxtacellularly recorded  
885 (x-axis) in a given time window (subplot title) based on 15 cells in Emx1-Ai93 mice. The  
886 blue bar graphs indicate the expected event magnitude reported by the L0 event detection  
887 (y-axis) as a function of the number of action potentials juxtacellularly recorded (x-axis) in  
888 a given time window (subplot title) based on 15 cells in Emx1-Ai93 mice. (d) As in c but  
889 based on 20 cells in Cux2-Ai93 mice.

890



# Supplemental Figure 12

**a**

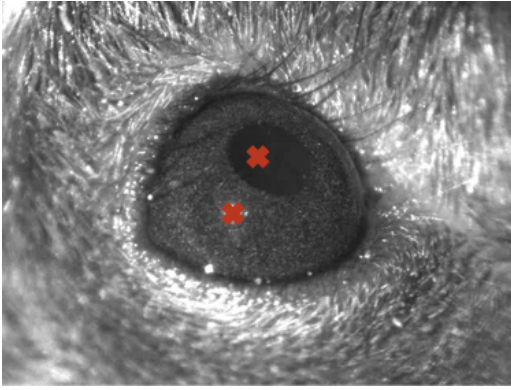

**b**

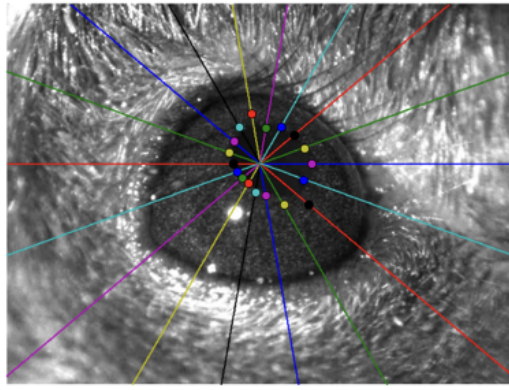

**c**

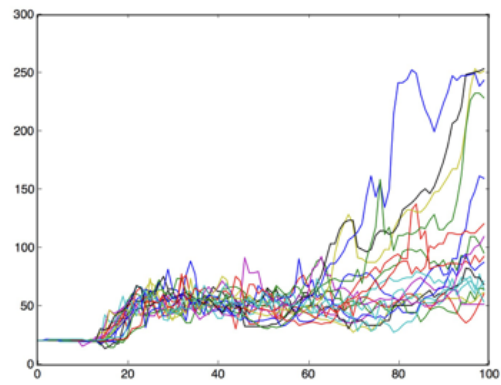

**d**

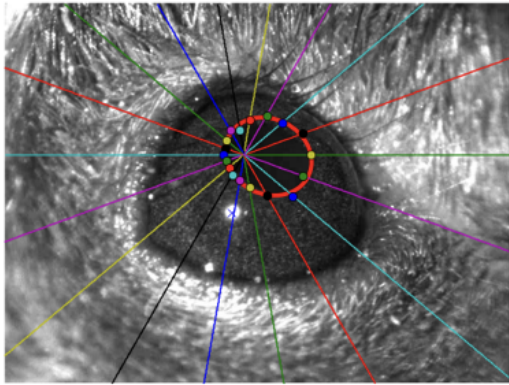

**e**

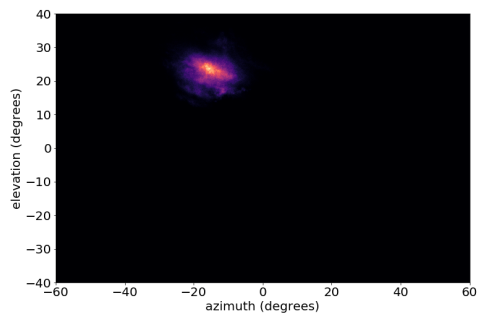

**f**

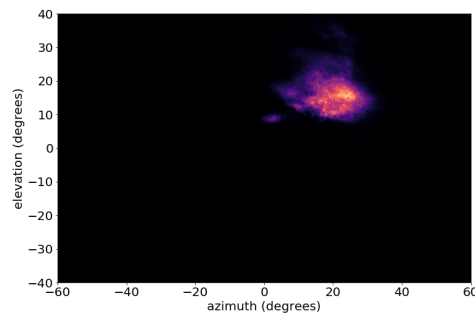

**g**

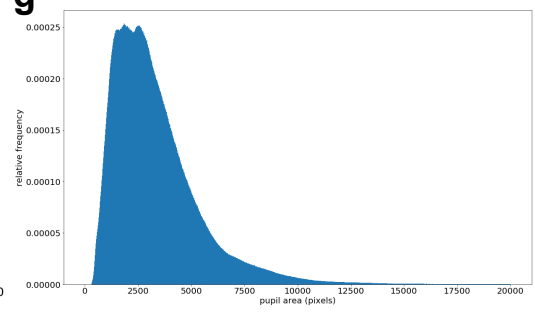

891 **Supplemental Figure 12: Eye tracking and characterization**

892 (a) Seed points are selected by finding points of maximal correlation with bright or dark  
893 spots. (b) Rays are traced from these points and boundaries are detected by thresholding  
894 against a proportion of the mean of the initial portion of the ray. (c) Example luminance  
895 progression along rays. (d) A ransac algorithm is used to fit an ellipse to the detected  
896 boundary points. (e) Eye position for the first monitor position. (f) Eye position for the  
897 second monitor position. (g) Histogram of pupil area.

898

# Supplemental Figure 13

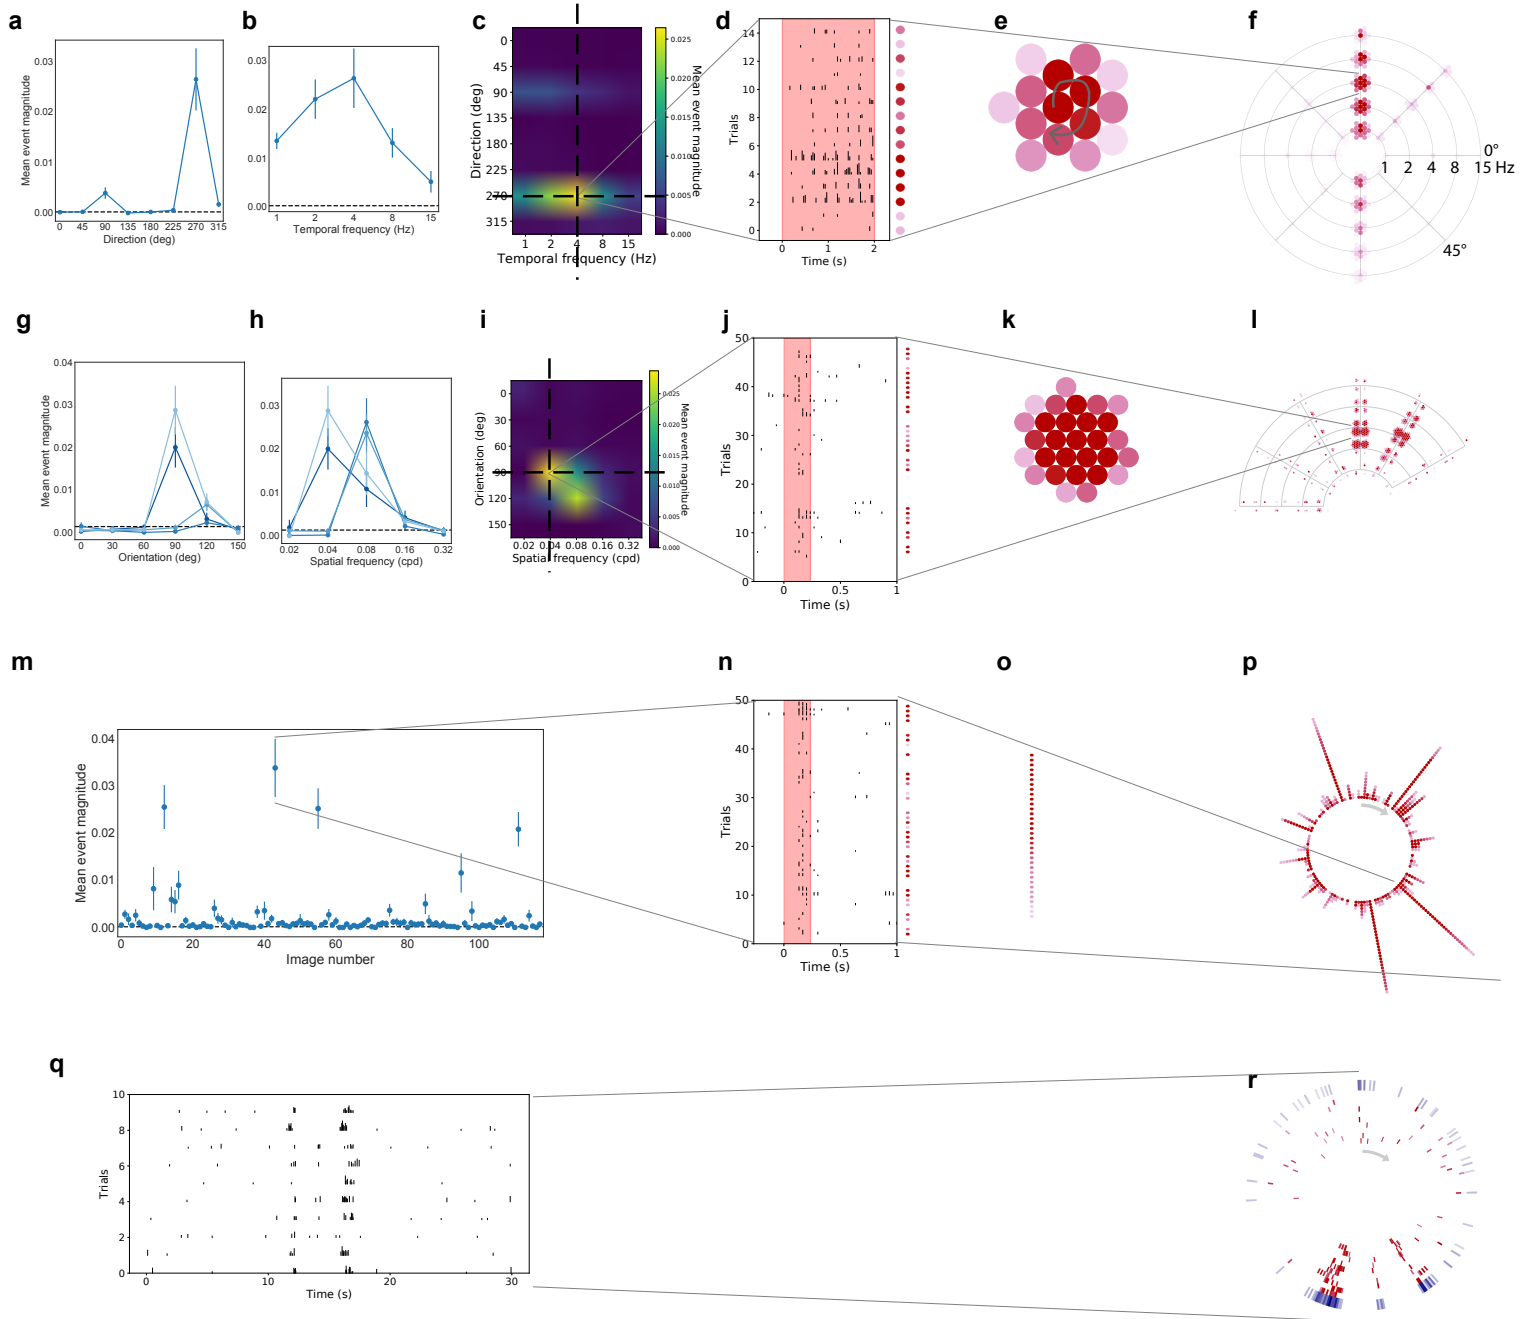

## 899 Supplemental Figure 13: Response visualizations

900 Conventional tuning curves for drifting grating responses for one cell. (a) Direction tuning  
901 plotted at the preferred temporal frequency (4 Hz) (mean  $\pm$  sem). Dotted line represents  
902 the mean response to the blank sweep. (b) Temporal frequency tuning plotted at the  
903 preferred grating direction (270°). (c) Heatmap of the direction and temporal frequency  
904 responses for cell, showing any possible interaction of direction and temporal frequency.  
905 (d) All 15 trials at the preferred direction and temporal frequency, 2 second grating  
906 presentation is indicated by pink shading. The mean event magnitude is represented by  
907 intensity of the dot to the right of the trial. (e) All trials are clustered, with the strongest  
908 response in the center and weaker responses on the outside. (f) Clusters are plotted on a  
909 “Star plot”. Arms indicated the direction of grating motion, arcs indicate the temporal  
910 frequency of the grating, with the lowest in the center and the highest at the outside.  
911 Clusters of red dots are located at the intersection and arms and arcs, representing the  
912 trial responses at that condition.

913 Tuning curves for static gratings for one cell. (g) Orientation tuning plotted at the  
914 preferred spatial frequency for each of the four phases. Dotted line represents the mean  
915 response to the blank sweep. (h) Spatial frequency tuning plotted at the preferred  
916 orientation for each of the four phases. (i) Heatmap of the orientation and spatial  
917 frequency at the preferred phase (j) All trials at the preferred orientation, spatial frequency  
918 and phase, the 250 ms grating presentation is indicated by pink shading. The mean event  
919 magnitude is represented by the intensity of the dot to the right of the trial. (k) All trials are  
920 clustered, with the strongest response in the center and weaker responses on the outside.  
921 (l) Clusters are placed on a “Fan plot”. Arms represent the orientation and arcs represent  
922 the spatial frequency of the grating. At each intersection, there are four lobes of clustered  
923 dots, one for each phase at that grating condition.

924 Responses to natural scenes. (m) Responses to each image presented, mean  $\pm$   
925 sem. Dotted line represents the mean response to the blank sweep. (n) All trials of the  
926 image which elicited the largest mean response, the 250 ms image presentation is  
927 indicated by pink shading. The mean event magnitude is represented by the intensity of  
928 the dot to the right of the trial. Trials are sorted (o) and are plotted on a “Corona plot” (p).  
929 Each ray represents the response to one image, with the strongest response on the inside  
930 and weaker responses at the outside.

931 Responses to natural movies (q) Responses of one cell’s response to each trial of  
932 the natural movie. (r) Responses are plotted on a “Track plot”. Each red ring represents  
933 the activity of the cell to one trial, proceed clockwise from the top of the track. The outer  
934 blue track represents the mean response across all ten trials.

935

# Supplemental Figure 14

## Drifting gratings

| Cre                 | V1    |            |         | LM    |            |         | AL    |            |         | PM    |            |         | AM    |            |         | RL    |            |         |
|---------------------|-------|------------|---------|-------|------------|---------|-------|------------|---------|-------|------------|---------|-------|------------|---------|-------|------------|---------|
|                     | total | responsive | percent | total | responsive | percent | total | responsive | percent | total | responsive | percent | total | responsive | percent | total | responsive | percent |
| Emx1 - layer 2/3    | 461   | 269        | 58%     | 769   | 450        | 59%     | 328   | 181        | 55%     | 293   | 106        | 36%     | 105   | 50         | 48%     | 694   | 154        | 22%     |
| Emx1 - layer 4      | 969   | 639        | 66%     | 677   | 362        | 53%     | 591   | 411        | 70%     | 168   | 60         | 36%     | 83    | 23         | 28%     | 1019  | 240        | 24%     |
| Emx1 - layer 5      | 745   | 414        | 56%     |       |            |         | 316   | 186        | 59%     | 75    | 51         | 68%     | 53    | 31         | 58%     | 250   | 43         | 17%     |
| Slc17a7 - layer 2/3 | 868   | 510        | 59%     | 437   | 184        | 42%     | 41    | 19         | 46%     | 342   | 155        | 45%     | 138   | 51         | 37%     | 45    | 15         | 33%     |
| Slc17a7 - layer 4   | 932   | 526        | 56%     | 678   | 362        | 53%     | 182   | 104        | 57%     | 265   | 111        | 42%     |       |            |         | 115   | 51         | 44%     |
| Slc17a7 - layer 5   | 766   | 435        | 57%     | 102   | 79         | 77%     |       |            |         | 159   | 89         | 56%     |       |            |         | 52    | 21         | 40%     |
| Cux2 - layer 2/3    | 1721  | 810        | 47%     | 850   | 431        | 51%     | 723   | 332        | 46%     | 1036  | 421        | 41%     | 352   | 149        | 42%     | 438   | 124        | 28%     |
| Cux2 - layer 4      | 1815  | 1069       | 59%     | 1540  | 845        | 55%     | 1500  | 822        | 55%     | 849   | 325        | 38%     | 726   | 383        | 53%     | 524   | 119        | 23%     |
| Rorb                | 1617  | 1010       | 62%     | 767   | 399        | 52%     | 794   | 383        | 48%     | 411   | 202        | 49%     | 516   | 252        | 49%     | 1202  | 302        | 25%     |
| Scnn1a              | 1200  | 522        | 44%     |       |            |         |       |            |         |       |            |         |       |            |         |       |            |         |
| Nr5a1               | 528   | 188        | 36%     | 242   | 75         | 31%     | 144   | 55         | 38%     | 203   | 66         | 33%     | 110   | 39         | 35%     | 854   | 254        | 30%     |
| Rbp4                | 369   | 249        | 67%     | 342   | 208        | 61%     | 301   | 178        | 59%     | 432   | 210        | 49%     | 244   | 137        | 56%     | 97    | 39         | 40%     |
| Fezf2               | 335   | 247        | 74%     | 550   | 405        | 74%     |       |            |         |       |            |         |       |            |         |       |            |         |
| Tlx3                | 840   | 400        | 48%     | 684   | 405        | 59%     |       |            |         |       |            |         |       |            |         |       |            |         |
| Ntsr1               | 244   | 149        | 61%     | 109   | 56         | 51%     |       |            |         | 232   | 116        | 50%     |       |            |         |       |            |         |
| Sst - layer 4       | 101   | 94         | 93%     | 108   | 101        | 94%     | 35    | 33         | 94%     | 112   | 96         | 86%     |       |            |         | 15    | 15         | 100%    |
| Sst - layer 5       | 201   | 159        | 79%     | 100   | 74         | 74%     |       |            |         | 122   | 90         | 74%     |       |            |         | 5     | 2          | 40%     |
| Vip - layer 2/3     | 116   | 6          | 5%      | 92    | 12         | 13%     |       |            |         | 144   | 59         | 41%     |       |            |         |       |            |         |
| Vip - layer 4       | 61    | 10         | 16%     | 105   | 27         | 26%     |       |            |         | 82    | 47         | 57%     |       |            |         |       |            |         |

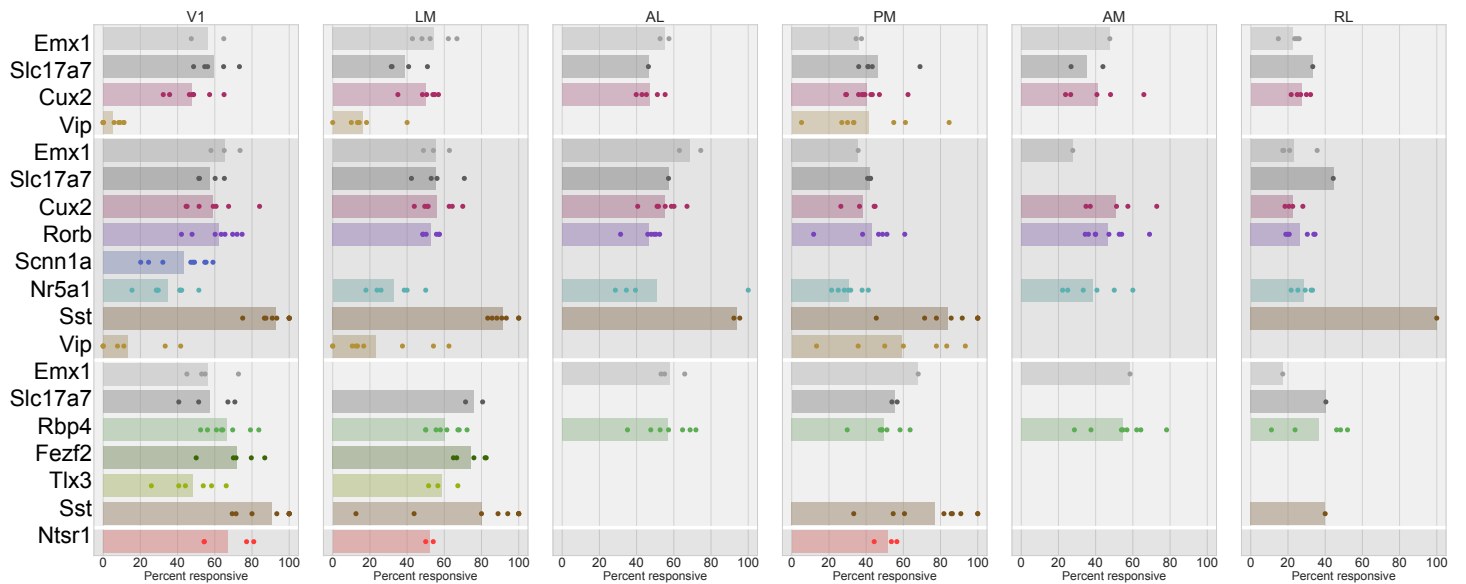

936 **Supplemental Figure 14: Responsiveness to drifting gratings**

937 (a) Table summarizing the numbers of cells imaged for each Cre line, layer, area  
938 combination in response to drifting grating stimulus and the number, and percent, of cells  
939 that were responsive to the drifting grating stimulus. (b) Strip plots of the percent of cells  
940 responsive to the drifting grating stimulus for each experiment.

941

# Supplemental Figure 15

## Static gratings

| Cre                 | V1    |            |         | LM    |            |         | AL    |            |         | PM    |            |         | AM    |            |         | RL    |            |         |
|---------------------|-------|------------|---------|-------|------------|---------|-------|------------|---------|-------|------------|---------|-------|------------|---------|-------|------------|---------|
|                     | total | responsive | percent | total | responsive | percent | total | responsive | percent | total | responsive | percent | total | responsive | percent | total | responsive | percent |
| Emx1 - layer 2/3    | 430   | 174        | 40%     | 721   | 210        | 29%     | 340   | 116        | 34%     | 251   | 58         | 23%     | 88    | 19         | 22%     | 697   | 37         | 5%      |
| Emx1 - layer 4      | 729   | 284        | 39%     | 634   | 162        | 26%     | 543   | 154        | 28%     | 188   | 25         | 13%     | 134   | 14         | 10%     | 966   | 42         | 4%      |
| Emx1 - layer 5      | 684   | 202        | 30%     |       |            |         | 233   | 69         | 30%     | 44    | 7          | 16%     | 39    | 4          | 10%     | 272   | 1          | 0%      |
| Slc17a7 - layer 2/3 | 767   | 302        | 39%     | 438   | 102        | 23%     | 38    | 14         | 37%     | 338   | 89         | 26%     | 137   | 26         | 19%     | 33    | 16         | 48%     |
| Slc17a7 - layer 4   | 828   | 267        | 32%     | 663   | 199        | 30%     | 242   | 53         | 22%     | 192   | 32         | 17%     |       |            |         | 63    | 21         | 33%     |
| Slc17a7 - layer 5   | 695   | 275        | 40%     | 90    | 37         | 41%     |       |            |         | 169   | 68         | 40%     |       |            |         | 48    | 2          | 4%      |
| Cux2 - layer 2/3    | 1716  | 698        | 41%     | 851   | 302        | 35%     | 664   | 212        | 32%     | 944   | 221        | 23%     | 355   | 102        | 29%     | 412   | 41         | 10%     |
| Cux2 - layer 4      | 1806  | 720        | 40%     | 1566  | 509        | 33%     | 1211  | 352        | 29%     | 771   | 149        | 19%     | 554   | 155        | 28%     | 491   | 23         | 5%      |
| Rorb                | 1404  | 537        | 38%     | 753   | 217        | 29%     | 791   | 180        | 23%     | 341   | 76         | 22%     | 388   | 49         | 13%     | 1149  | 61         | 5%      |
| Scnn1a              | 1114  | 263        | 24%     |       |            |         |       |            |         |       |            |         |       |            |         |       |            |         |
| Nr5a1               | 458   | 118        | 26%     | 232   | 40         | 17%     | 83    | 15         | 18%     | 228   | 45         | 20%     | 123   | 19         | 15%     | 854   | 27         | 3%      |
| Rbp4                | 304   | 129        | 42%     | 378   | 122        | 32%     | 285   | 122        | 43%     | 411   | 94         | 23%     | 212   | 60         | 28%     | 89    | 14         | 16%     |
| Fezf2               | 304   | 177        | 58%     | 582   | 266        | 46%     |       |            |         |       |            |         |       |            |         |       |            |         |
| Tlx3                | 829   | 382        | 46%     | 612   | 279        | 46%     |       |            |         |       |            |         |       |            |         |       |            |         |
| Ntsr1               | 216   | 61         | 28%     | 143   | 42         | 29%     |       |            |         | 196   | 22         | 11%     |       |            |         |       |            |         |
| Sst - layer 4       | 111   | 93         | 84%     | 86    | 70         | 81%     | 115   | 17         | 15%     | 178   | 43         | 24%     |       |            |         | 14    | 1          | 7%      |
| Sst - layer 5       | 126   | 55         | 44%     | 166   | 40         | 24%     |       |            |         | 187   | 37         | 20%     |       |            |         | 7     | 0          | 0%      |
| Vip - layer 2/3     | 113   | 13         | 12%     | 82    | 20         | 24%     |       |            |         | 136   | 29         | 21%     |       |            |         |       |            |         |
| Vip - layer 4       | 52    | 12         | 23%     | 104   | 40         | 38%     |       |            |         | 87    | 37         | 43%     |       |            |         |       |            |         |

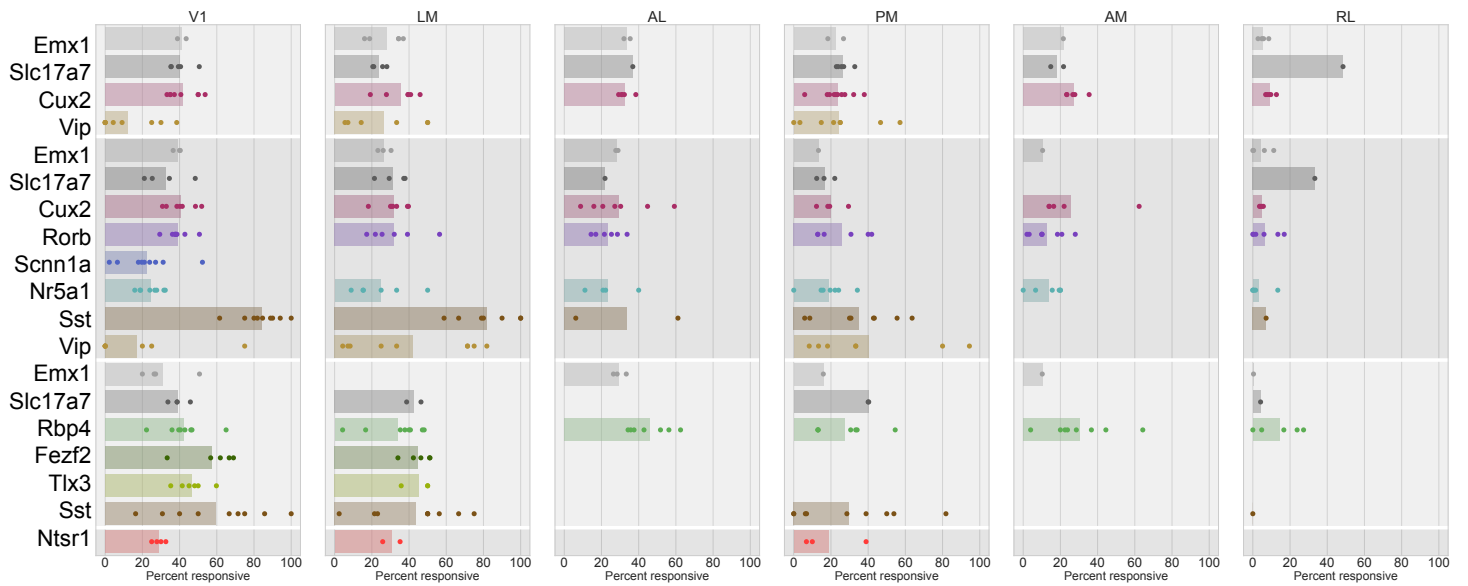

942 **Supplemental Figure 15: Responsiveness to static gratings**

943 (a) Table summarizing the numbers of cells imaged for each Cre line, layer, area  
944 combination in response to static grating stimulus and the number, and percent, of cells  
945 that were responsive to the static grating stimulus. (b) Strip plots of the percent of cells  
946 responsive to the static grating stimulus for each experiment.

947



# Supplemental Figure 16

## Locally Sparse Noise

| Cre                 | V1    |            |         | LM    |            |         | AL    |            |         | PM    |            |         | AM    |            |         | RL    |            |         |
|---------------------|-------|------------|---------|-------|------------|---------|-------|------------|---------|-------|------------|---------|-------|------------|---------|-------|------------|---------|
|                     | total | responsive | percent | total | responsive | percent | total | responsive | percent | total | responsive | percent | total | responsive | percent | total | responsive | percent |
| Emx1 - layer 2/3    | 407   | 107        | 26%     | 654   | 516        | 79%     | 316   | 255        | 81%     | 270   | 51         | 19%     | 78    | 15         | 19%     | 759   | 47         | 6%      |
| Emx1 - layer 4      | 855   | 785        | 92%     | 584   | 398        | 68%     | 557   | 424        | 76%     | 206   | 35         | 17%     | 117   | 12         | 10%     | 1088  | 100        | 9%      |
| Emx1 - layer 5      | 640   | 475        | 74%     |       |            |         | 275   | 148        | 54%     | 76    | 13         | 17%     | 31    | 2          | 6%      | 238   | 0          | 0%      |
| Slc17a7 - layer 2/3 | 873   | 812        | 93%     | 427   | 300        | 70%     | 38    | 15         | 39%     | 344   | 92         | 27%     | 149   | 36         | 24%     | 34    | 9          | 26%     |
| Slc17a7 - layer 4   | 818   | 621        | 76%     | 634   | 486        | 77%     | 229   | 75         | 33%     | 207   | 27         | 13%     |       |            |         | 84    | 13         | 15%     |
| Slc17a7 - layer 5   | 790   | 772        | 98%     | 94    | 66         | 70%     |       |            |         | 156   | 32         | 21%     |       |            |         | 36    | 2          | 6%      |
| Cux2 - layer 2/3    | 1391  | 300        | 22%     | 902   | 209        | 23%     | 656   | 74         | 11%     | 845   | 33         | 4%      | 320   | 51         | 16%     | 425   | 29         | 7%      |
| Cux2 - layer 4      | 1732  | 575        | 33%     | 1417  | 542        | 38%     | 1165  | 415        | 36%     | 759   | 9          | 1%      | 535   | 169        | 32%     | 541   | 36         | 7%      |
| Rorb                | 1414  | 646        | 46%     | 783   | 262        | 33%     | 753   | 156        | 21%     | 397   | 38         | 10%     | 404   | 16         | 4%      | 1214  | 59         | 5%      |
| Scnn1a              | 1176  | 226        | 19%     |       |            |         |       |            |         |       |            |         |       |            |         |       |            |         |
| Nr5a1               | 427   | 86         | 20%     | 253   | 49         | 19%     | 85    | 18         | 21%     | 234   | 34         | 15%     | 115   | 9          | 8%      | 805   | 17         | 2%      |
| Rbp4                | 353   | 128        | 36%     | 437   | 145        | 33%     | 309   | 72         | 23%     | 382   | 37         | 10%     | 237   | 14         | 6%      | 95    | 11         | 12%     |
| Fezf2               | 280   | 198        | 71%     | 604   | 413        | 68%     |       |            |         |       |            |         |       |            |         |       |            |         |
| Tlx3                | 874   | 497        | 57%     | 629   | 511        | 81%     |       |            |         |       |            |         |       |            |         |       |            |         |
| Ntsr1               | 196   | 31         | 16%     | 135   | 24         | 18%     |       |            |         | 203   | 11         | 5%      |       |            |         |       |            |         |
| Sst - layer 4       | 107   | 63         | 59%     | 78    | 32         | 41%     | 132   | 1          | 1%      | 188   | 3          | 2%      |       |            |         | 25    | 0          | 0%      |
| Sst - layer 5       | 88    | 38         | 43%     | 103   | 27         | 26%     |       |            |         | 103   | 9          | 9%      |       |            |         | 7     | 0          | 0%      |
| Vip - layer 2/3     | 120   | 81         | 68%     | 79    | 44         | 56%     |       |            |         | 126   | 8          | 6%      |       |            |         |       |            |         |
| Vip - layer 4       | 55    | 46         | 84%     | 94    | 57         | 61%     |       |            |         | 77    | 6          | 8%      |       |            |         |       |            |         |

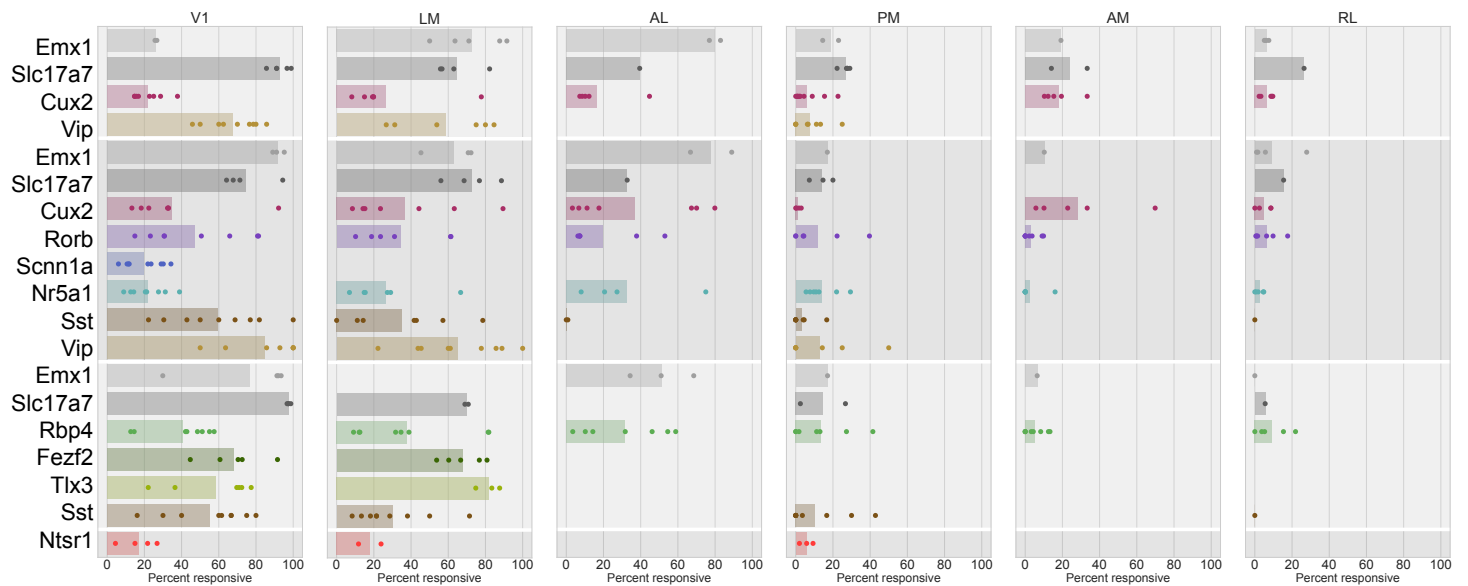

948 **Supplemental Figure 16: Responsiveness to locally sparse noise**

949 (a) Table summarizing the numbers of cells imaged for each Cre line, layer, area  
950 combination in response to locally sparse noise stimulus and the number, and percent, of  
951 cells that were responsive to the locally sparse noise stimulus. (b) Strip plots of the  
952 percent of cells responsive to the locally sparse noise stimulus for each experiment.

953

# Supplemental Figure 17

## Natural Scenes

| Cre                 | V1    |            |         | LM    |            |         | AL    |            |         | PM    |            |         | AM    |            |         | RL    |            |         |
|---------------------|-------|------------|---------|-------|------------|---------|-------|------------|---------|-------|------------|---------|-------|------------|---------|-------|------------|---------|
|                     | total | responsive | percent | total | responsive | percent | total | responsive | percent | total | responsive | percent | total | responsive | percent | total | responsive | percent |
| Emx1 - layer 2/3    | 430   | 268        | 62%     | 721   | 393        | 55%     | 340   | 190        | 56%     | 251   | 126        | 50%     | 88    | 27         | 31%     | 697   | 41         | 6%      |
| Emx1 - layer 4      | 729   | 437        | 60%     | 634   | 305        | 48%     | 543   | 232        | 43%     | 188   | 58         | 31%     | 134   | 27         | 20%     | 966   | 51         | 5%      |
| Emx1 - layer 5      | 684   | 422        | 62%     |       |            |         | 233   | 151        | 65%     | 44    | 16         | 36%     | 39    | 12         | 31%     | 272   | 0          | 0%      |
| Slc17a7 - layer 2/3 | 767   | 532        | 69%     | 438   | 247        | 56%     | 38    | 23         | 61%     | 338   | 160        | 47%     | 137   | 54         | 39%     | 33    | 14         | 42%     |
| Slc17a7 - layer 4   | 828   | 445        | 54%     | 663   | 367        | 55%     | 242   | 71         | 29%     | 192   | 69         | 36%     |       |            |         | 63    | 30         | 48%     |
| Slc17a7 - layer 5   | 695   | 545        | 78%     | 90    | 74         | 82%     |       |            |         | 169   | 96         | 57%     |       |            |         | 48    | 20         | 42%     |
| Cux2 - layer 2/3    | 1716  | 1197       | 70%     | 851   | 464        | 55%     | 664   | 323        | 49%     | 944   | 396        | 42%     | 355   | 161        | 45%     | 412   | 53         | 13%     |
| Cux2 - layer 4      | 1806  | 1098       | 61%     | 1566  | 843        | 54%     | 1211  | 511        | 42%     | 771   | 241        | 31%     | 554   | 229        | 41%     | 491   | 19         | 4%      |
| Rorb                | 1404  | 843        | 60%     | 753   | 438        | 58%     | 791   | 370        | 47%     | 341   | 116        | 34%     | 388   | 87         | 22%     | 1149  | 46         | 4%      |
| Scnn1a              | 1114  | 648        | 58%     |       |            |         |       |            |         |       |            |         |       |            |         |       |            |         |
| Nr5a1               | 458   | 259        | 57%     | 232   | 92         | 40%     | 83    | 23         | 28%     | 228   | 80         | 35%     | 123   | 30         | 24%     | 854   | 35         | 4%      |
| Rbp4                | 304   | 216        | 71%     | 378   | 230        | 61%     | 285   | 188        | 66%     | 411   | 141        | 34%     | 212   | 93         | 44%     | 89    | 17         | 19%     |
| Fezf2               | 304   | 254        | 84%     | 582   | 472        | 81%     |       |            |         |       |            |         |       |            |         |       |            |         |
| Tlx3                | 829   | 673        | 81%     | 612   | 492        | 80%     |       |            |         |       |            |         |       |            |         |       |            |         |
| Ntsr1               | 216   | 79         | 37%     | 143   | 58         | 41%     |       |            |         | 196   | 71         | 36%     |       |            |         |       |            |         |
| Sst - layer 4       | 111   | 81         | 73%     | 86    | 75         | 87%     | 115   | 38         | 33%     | 178   | 43         | 24%     |       |            |         | 14    | 1          | 7%      |
| Sst - layer 5       | 126   | 64         | 51%     | 166   | 55         | 33%     |       |            |         | 187   | 56         | 30%     |       |            |         | 7     | 0          | 0%      |
| Vip - layer 2/3     | 113   | 92         | 81%     | 82    | 53         | 65%     |       |            |         | 136   | 54         | 40%     |       |            |         |       |            |         |
| Vip - layer 4       | 52    | 45         | 87%     | 104   | 69         | 66%     |       |            |         | 87    | 56         | 64%     |       |            |         |       |            |         |

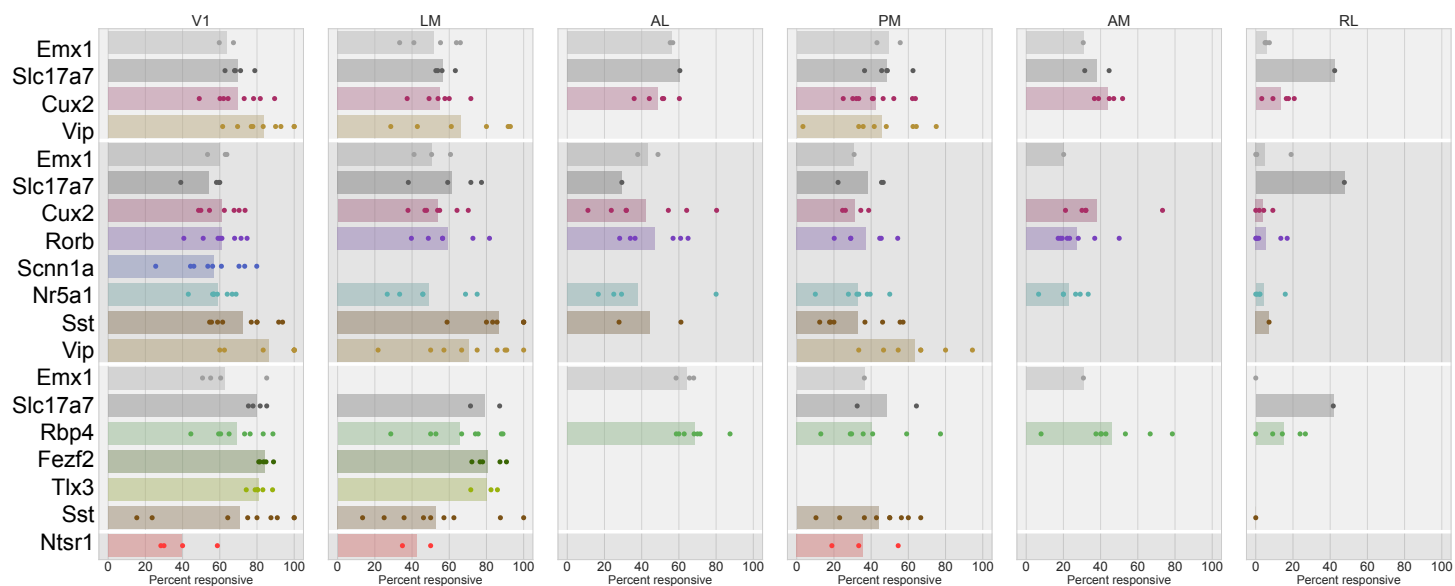

954 **Supplemental Figure 17: Responsiveness to natural scenes**

955 (a) Table summarizing the numbers of cells imaged for each Cre line, layer, area  
956 combination in response to the natural scenes stimulus and the number, and percent, of  
957 cells that were responsive to the natural scenes stimulus. (b) Strip plots of the percent of  
958 cells responsive to the natural scenes stimulus for each experiment.

959

# Supplemental Figure 18

## Natural Movies

| Cre                 | V1    |            |         | LM    |            |         | AL    |            |         | PM    |            |         | AM    |            |         | RL    |            |         |
|---------------------|-------|------------|---------|-------|------------|---------|-------|------------|---------|-------|------------|---------|-------|------------|---------|-------|------------|---------|
|                     | total | responsive | percent | total | responsive | percent | total | responsive | percent | total | responsive | percent | total | responsive | percent | total | responsive | percent |
| Emx1 - layer 2/3    | 695   | 402        | 58%     | 1122  | 628        | 56%     | 512   | 306        | 60%     | 422   | 123        | 29%     | 167   | 77         | 46%     | 1080  | 127        | 12%     |
| Emx1 - layer 4      | 1302  | 812        | 62%     | 976   | 459        | 47%     | 838   | 486        | 58%     | 308   | 63         | 20%     | 195   | 29         | 15%     | 1516  | 132        | 9%      |
| Emx1 - layer 5      | 1099  | 530        | 48%     |       |            |         | 437   | 257        | 59%     | 105   | 47         | 45%     | 95    | 33         | 35%     | 415   | 6          | 1%      |
| Slc17a7 - layer 2/3 | 1284  | 874        | 68%     | 749   | 309        | 41%     | 64    | 29         | 45%     | 581   | 232        | 40%     | 235   | 68         | 29%     | 65    | 9          | 14%     |
| Slc17a7 - layer 4   | 1288  | 761        | 59%     | 969   | 541        | 56%     | 310   | 100        | 32%     | 376   | 88         | 23%     |       |            |         | 185   | 55         | 30%     |
| Slc17a7 - layer 5   | 1162  | 784        | 67%     | 146   | 98         | 67%     |       |            |         | 245   | 117        | 48%     |       |            |         | 72    | 25         | 35%     |
| Cux2 - layer 2/3    | 2533  | 1530       | 60%     | 1341  | 761        | 57%     | 1084  | 538        | 50%     | 1615  | 628        | 39%     | 580   | 220        | 38%     | 630   | 156        | 25%     |
| Cux2 - layer 4      | 2635  | 1532       | 58%     | 2504  | 1317       | 53%     | 1953  | 978        | 50%     | 1372  | 428        | 31%     | 1031  | 444        | 43%     | 740   | 97         | 13%     |
| Rorb                | 2218  | 1372       | 62%     | 1191  | 642        | 54%     | 1242  | 543        | 44%     | 593   | 239        | 40%     | 735   | 322        | 44%     | 1757  | 221        | 13%     |
| Scnn1a              | 1873  | 1047       | 56%     |       |            |         |       |            |         |       |            |         |       |            |         |       |            |         |
| Nr5a1               | 702   | 497        | 71%     | 416   | 206        | 50%     | 172   | 95         | 55%     | 331   | 128        | 39%     | 171   | 76         | 44%     | 1318  | 266        | 20%     |
| Rbp4                | 531   | 367        | 69%     | 640   | 299        | 47%     | 490   | 298        | 61%     | 590   | 262        | 44%     | 355   | 168        | 47%     | 136   | 51         | 38%     |
| Fezf2               | 490   | 353        | 72%     | 981   | 643        | 66%     |       |            |         |       |            |         |       |            |         |       |            |         |
| Tlx3                | 1181  | 892        | 76%     | 946   | 659        | 70%     |       |            |         |       |            |         |       |            |         |       |            |         |
| Ntsr1               | 331   | 118        | 36%     | 210   | 78         | 37%     |       |            |         | 330   | 100        | 30%     |       |            |         |       |            |         |
| Sst - layer 4       | 159   | 124        | 78%     | 152   | 121        | 80%     | 200   | 76         | 38%     | 310   | 142        | 46%     |       |            |         | 37    | 13         | 35%     |
| Sst - layer 5       | 290   | 103        | 36%     | 261   | 100        | 38%     |       |            |         | 298   | 105        | 35%     |       |            |         | 9     | 2          | 22%     |
| Vip - layer 2/3     | 157   | 130        | 83%     | 126   | 89         | 71%     |       |            |         | 198   | 116        | 59%     |       |            |         |       |            |         |
| Vip - layer 4       | 90    | 72         | 80%     | 154   | 114        | 74%     |       |            |         | 122   | 89         | 73%     |       |            |         |       |            |         |

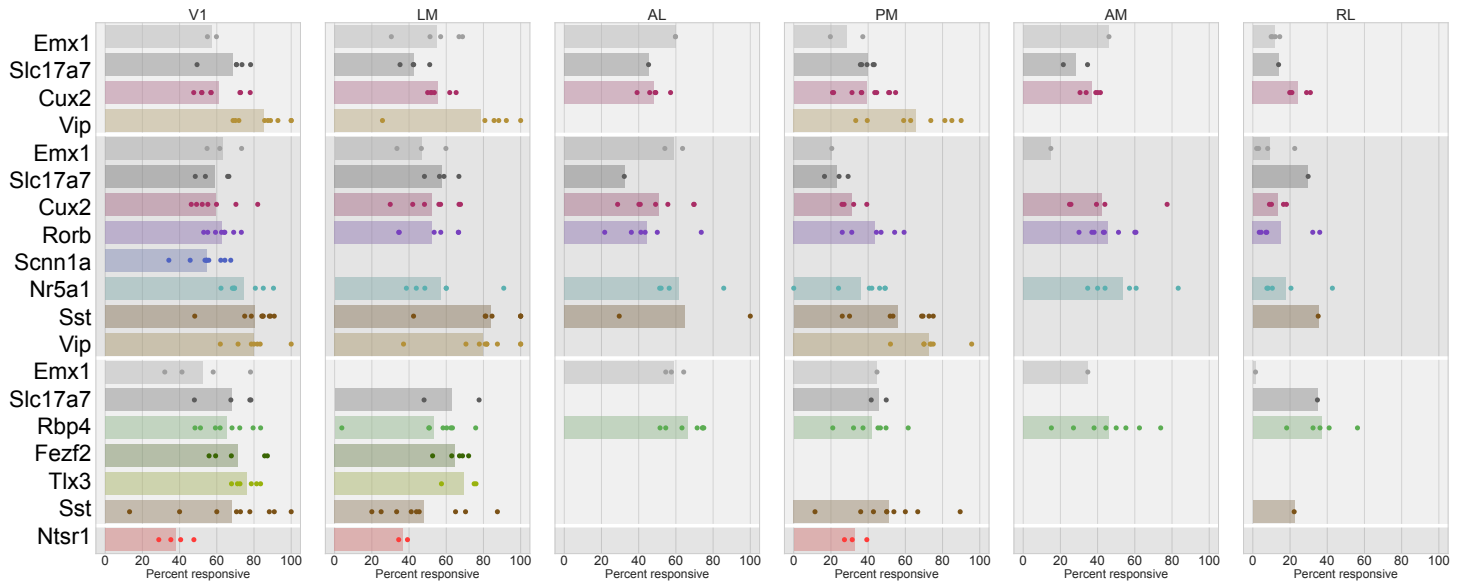

960 **Supplemental Figure 18: Responsiveness to natural movies.**

961 (a) Table summarizing the numbers of cells imaged for each Cre line, layer, area  
962 combination in response to any of the natural movie stimuli and the number, and percent,  
963 of cells that were responsive to the natural movie stimuli. (b) Strip plots of the percent of  
964 cells responsive to the natural movie stimuli for each experiment.

965

# Supplemental Figure 19

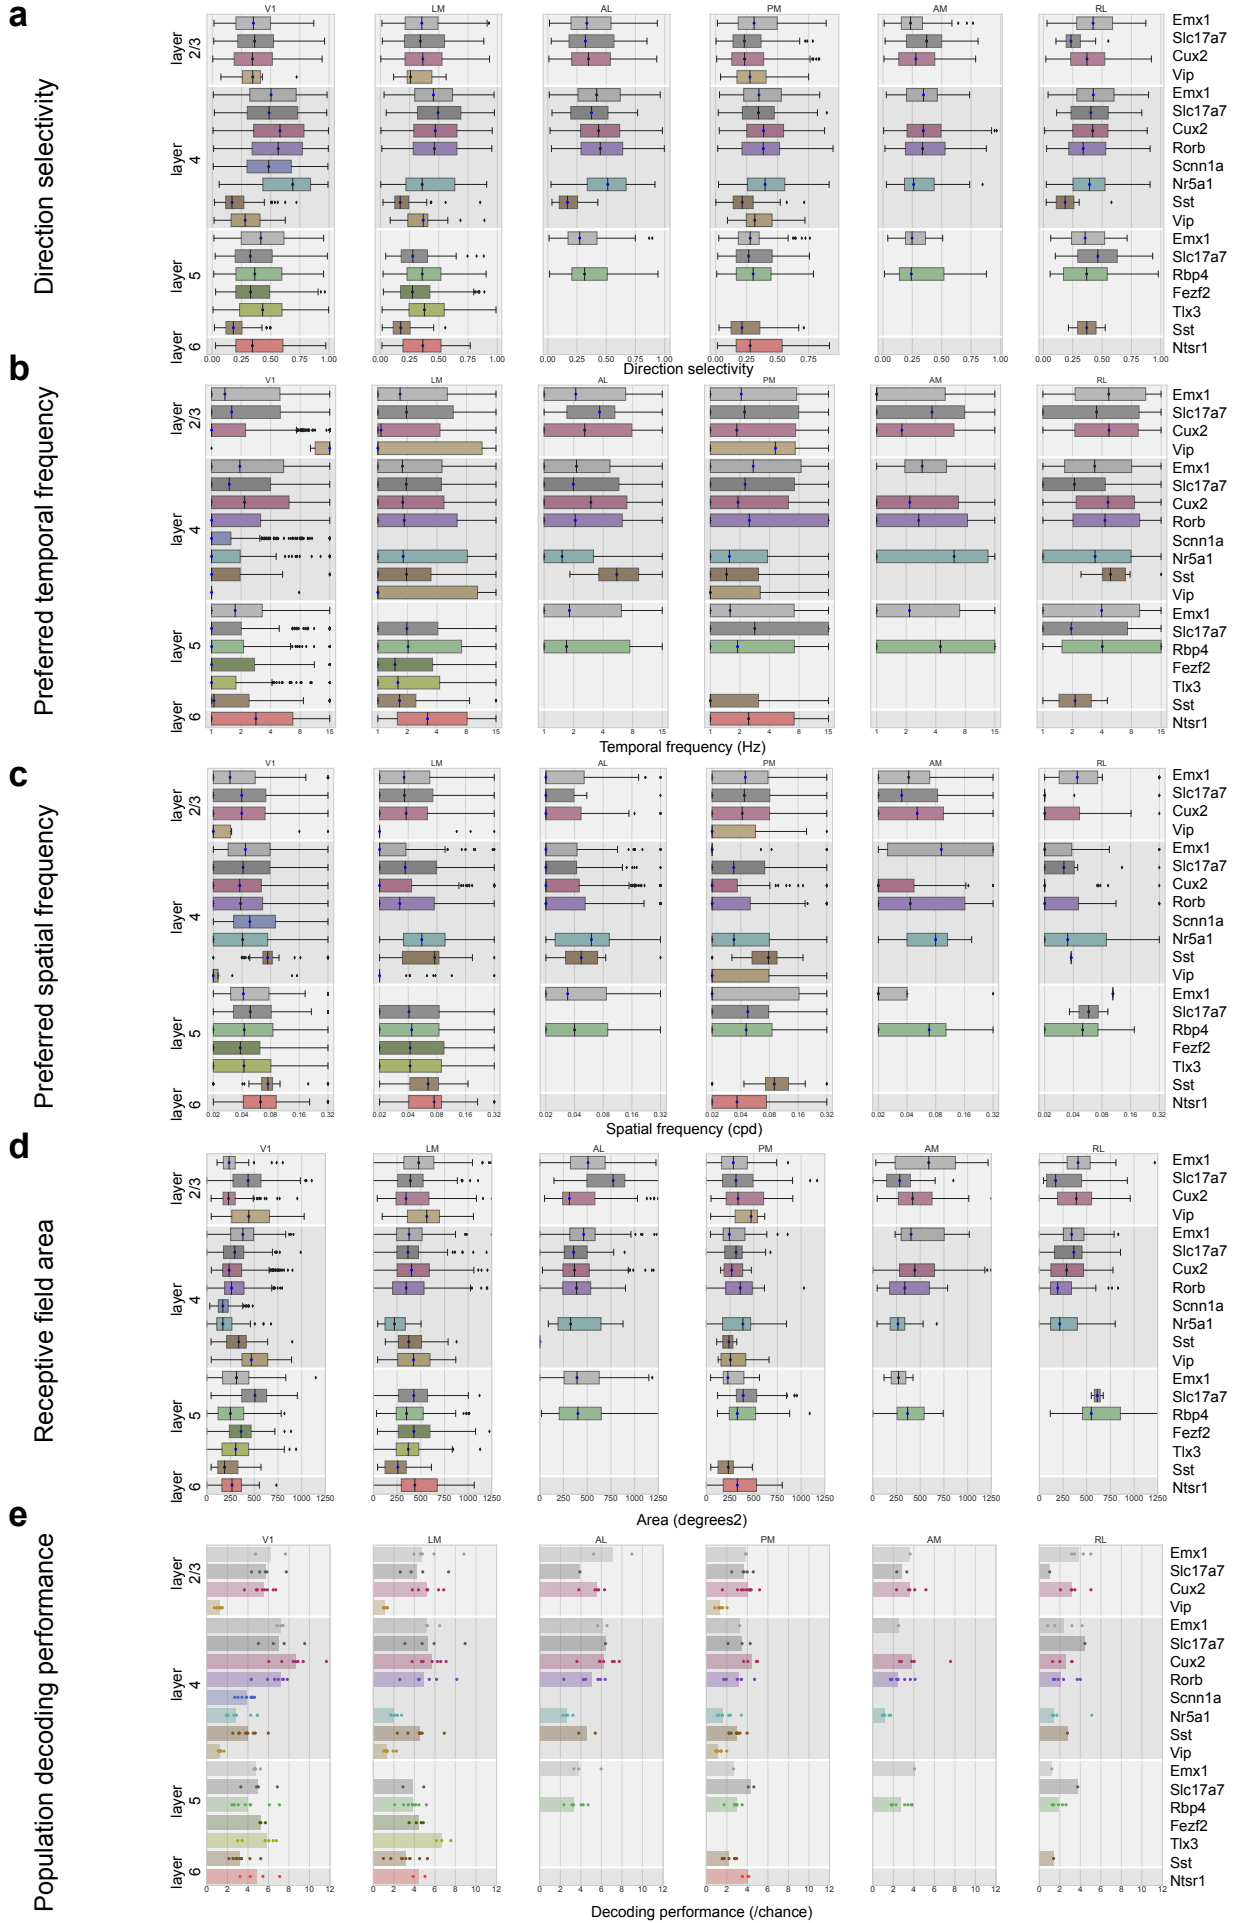

966 **Supplemental Figure 19: Response characterizations across all areas**  
967 Box or strip plots representing the distribution of values for (a) direction selectivity, (b)  
968 preferred temporal frequency, (c) preferred spatial frequency, (d) receptive field area, and  
969 (e) population decoding of grating direction for each Cre line and layer across all six visual  
970 areas.  
971



# Supplemental Figure 20

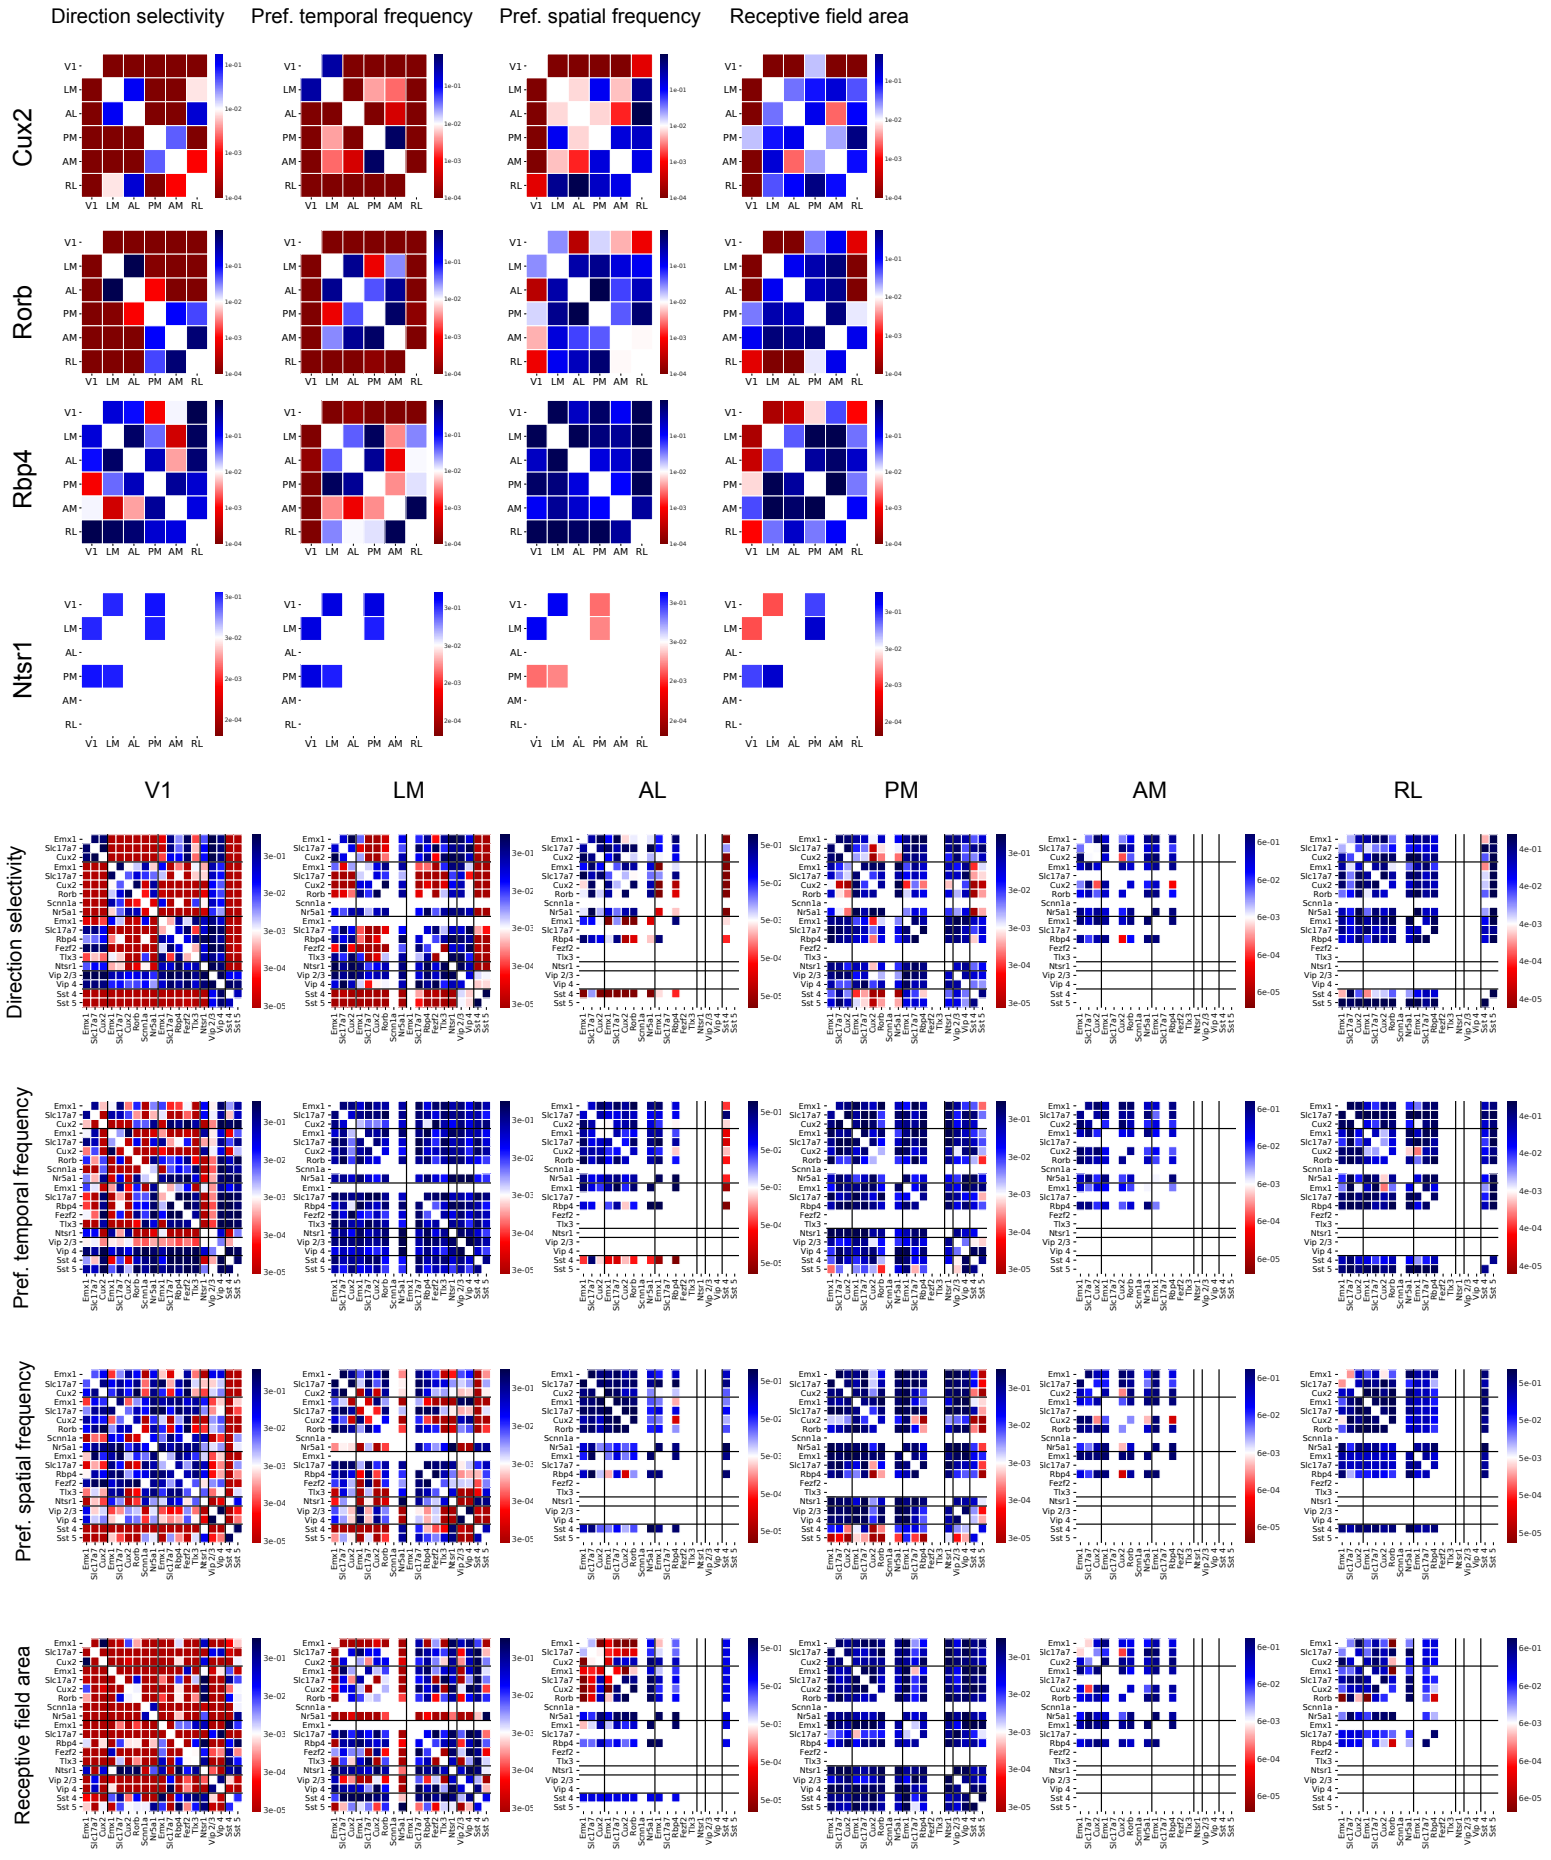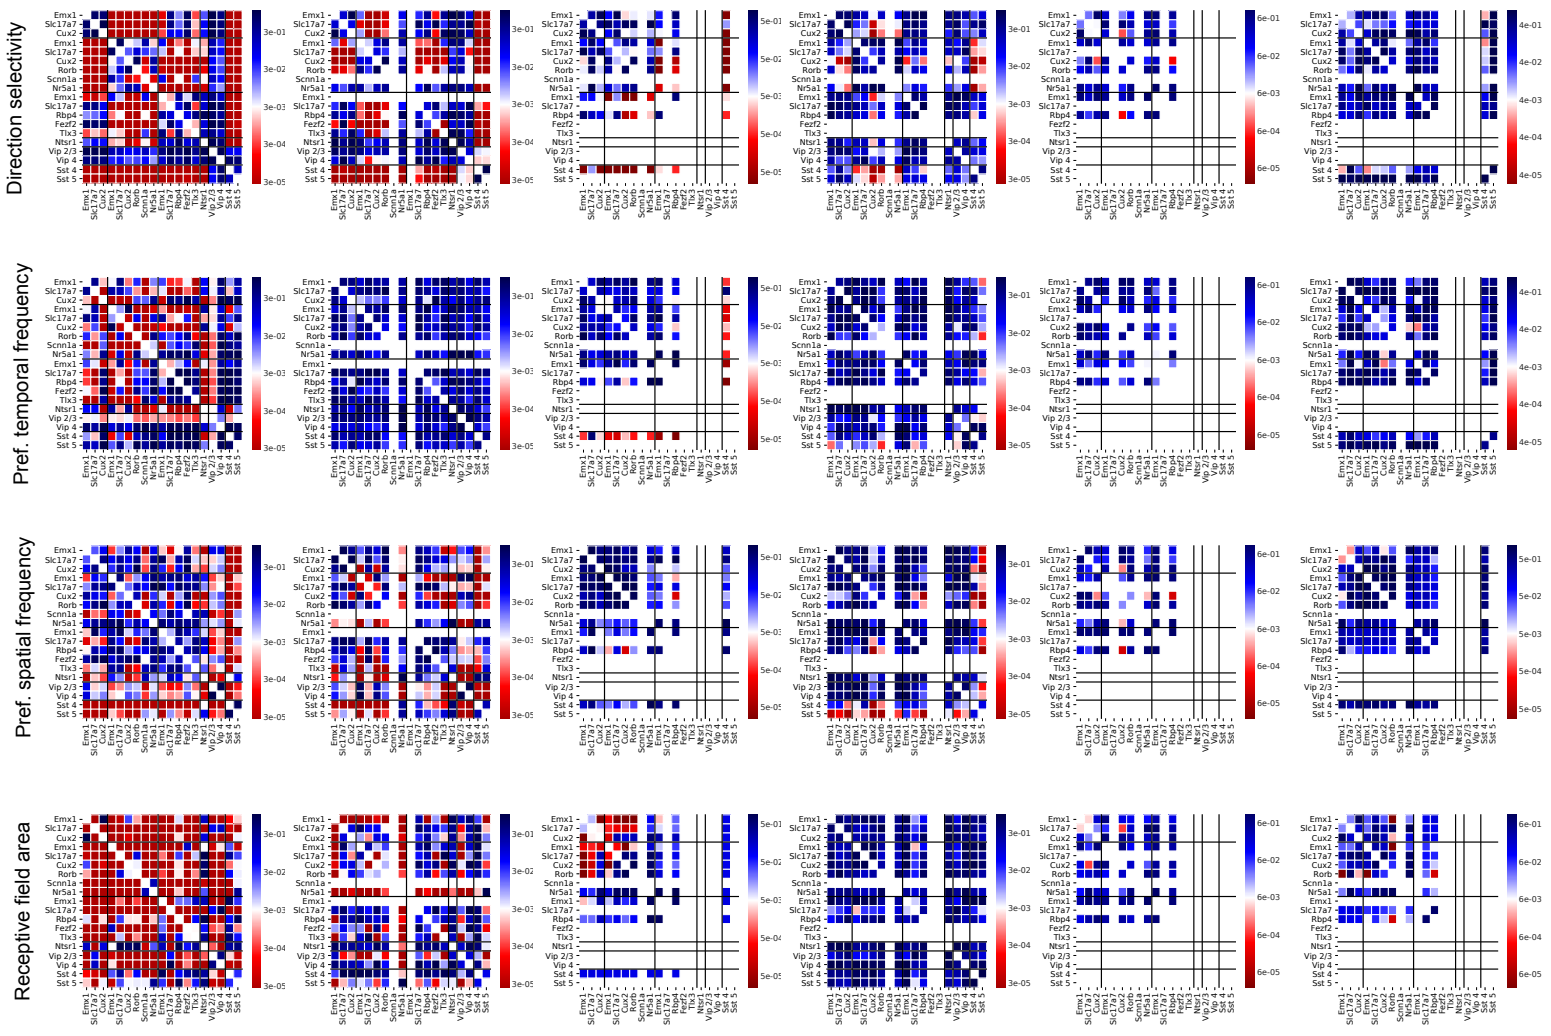

972 Supplemental Figure 20: Statistical tests for single cell response  
973 metrics

974 (a) Heatmaps of p-values of pairwise comparisons for each Cre line across areas using  
975 the Kolmogorov-Smirnov (KS) test with a Bonferroni correction for the number of  
976 comparisons. The heatmap is centered on the significance criteria. E.g. for comparisons  
977 across all six visual areas,  $p < 0.01$  ( $=0.05/5$ ) is significant. For comparisons across only 3  
978 visual areas (eg. for Ntsr1)  $p < 0.025$  is significant. (b) Heatmaps of p-values for pairwise  
979 comparison for each Cre-line and layer combination within each visual area, using KS test  
980 with a Bonferroni correction for the number of comparisons. The colormap for the p-values  
981 is centered at the significance criteria.

982

# Supplemental Figure 21

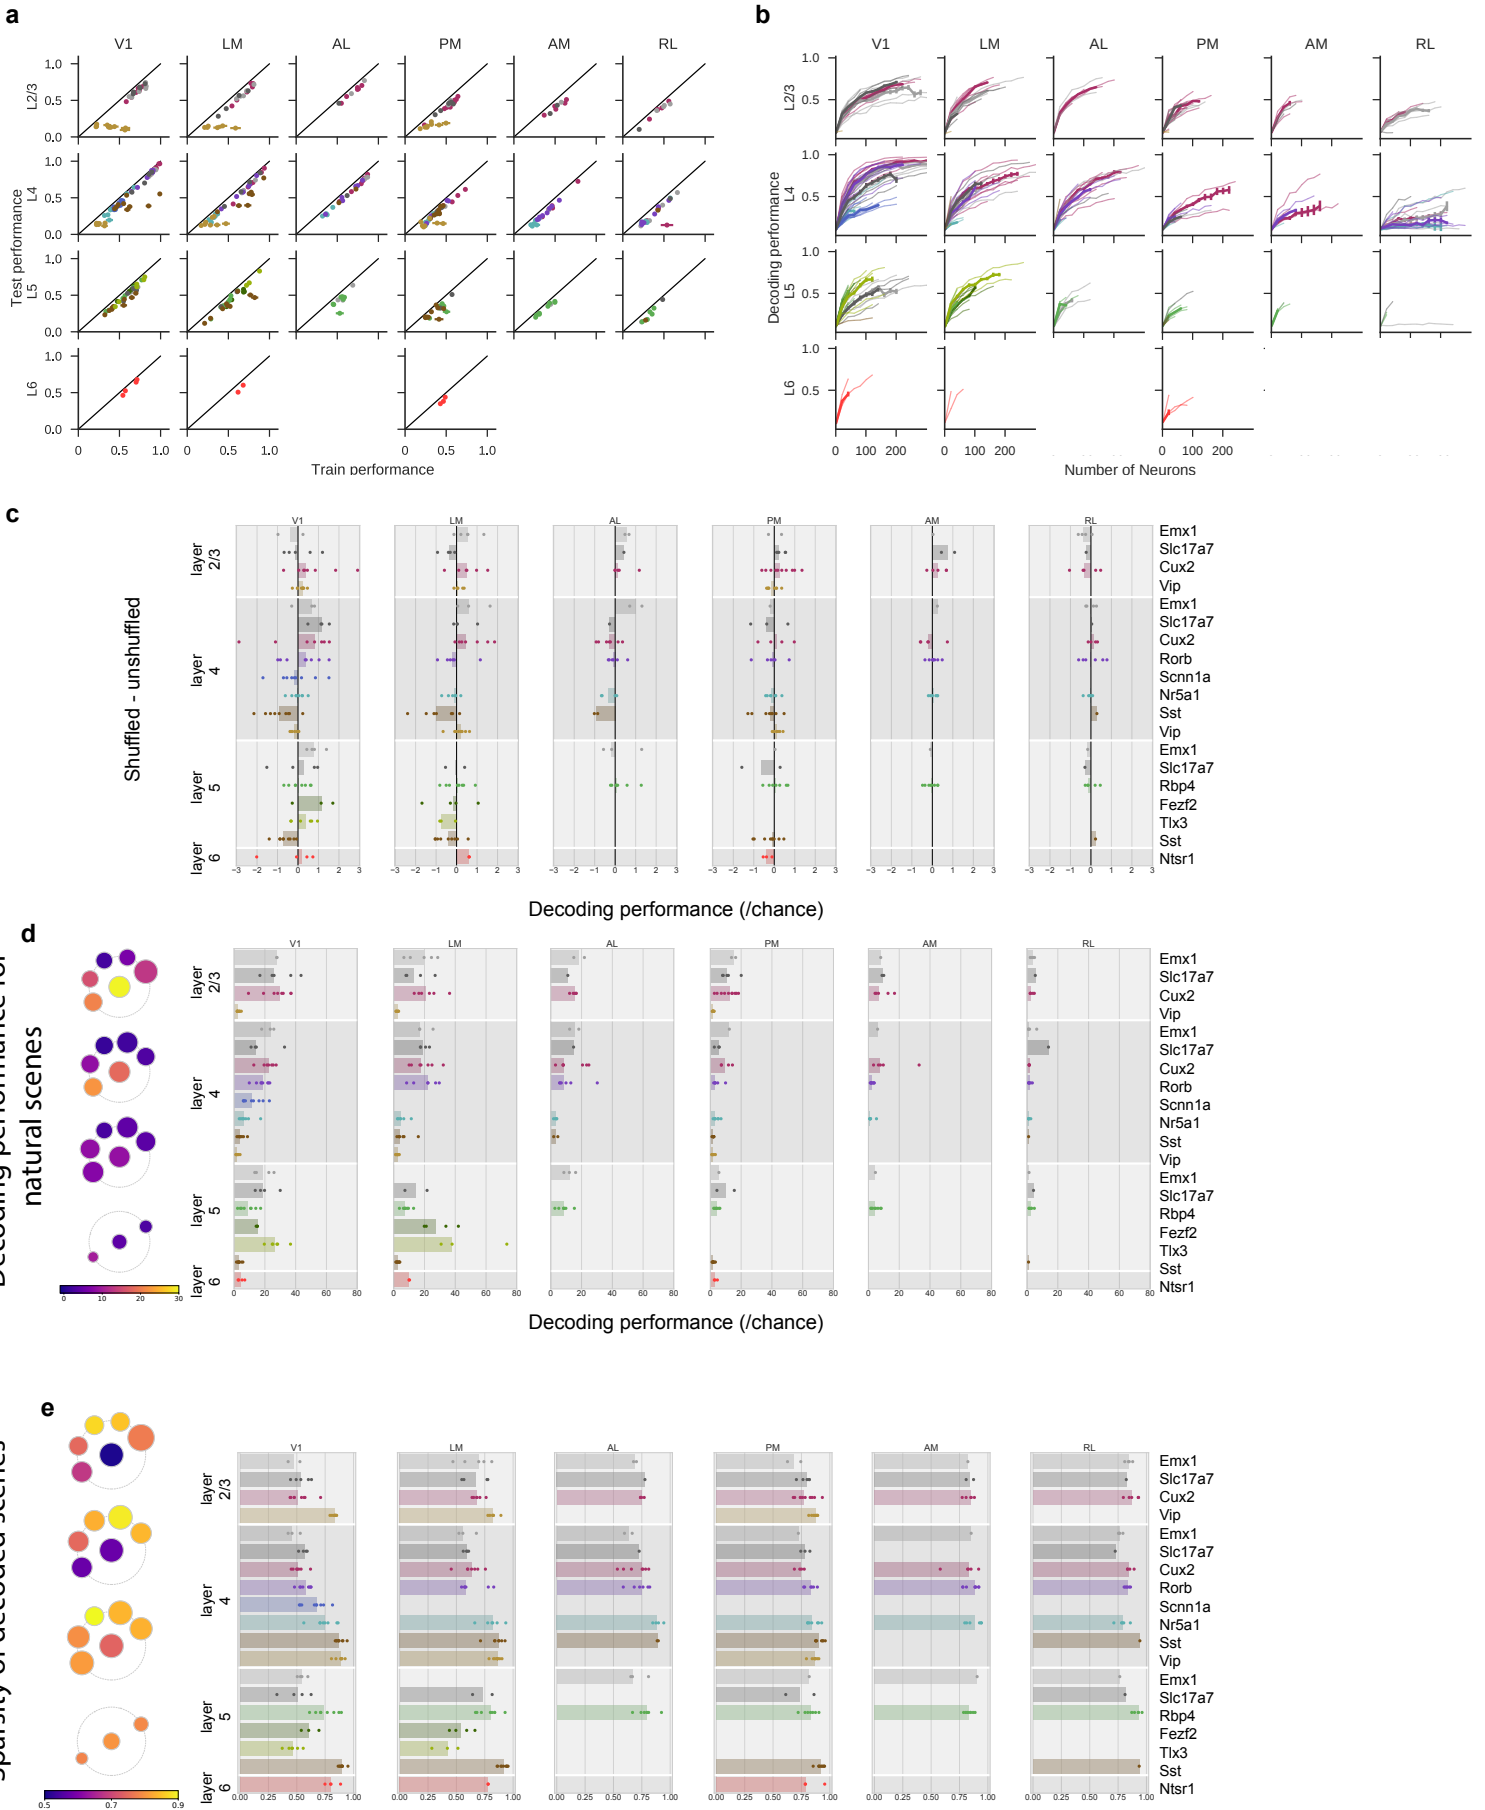

983 Supplemental Figure 21: Population decoding

984 (a) Test vs train performance for K-Nearest Neighbor decoding of drifting grating direction  
985 for each experiment, across all areas, layers and Cre lines. For all experiments, other than  
986 Vip, the experiments are close to unity, reflecting good generalization. Error bars represent  
987 the standard error of the mean across five-fold cross-validation. (b) Dependence of  
988 decoding performance on the number of cells included in the decoding, for all areas and  
989 Cre lines. (c) Strip plots of the difference between the decoding performance when trials  
990 are shuffled, destroying noise correlations, and trials are kept intact. For excitatory cells in  
991 V1, the median differences are small but positive, indicating that noise correlations hurt  
992 decoding performance. For Sst cells, noise correlations help decoding performance. (d)  
993 Pawplot and strip plots summarizing decoding performance for natural scenes, relative to  
994 chance. (e) Pawplot and strip plots summarizing the sparsity of natural scene decoding,  
995 reflecting the sparsity of the distribution of decoding performance across natural scenes in  
996 a given experiment.

997

# Supplemental Figure 22

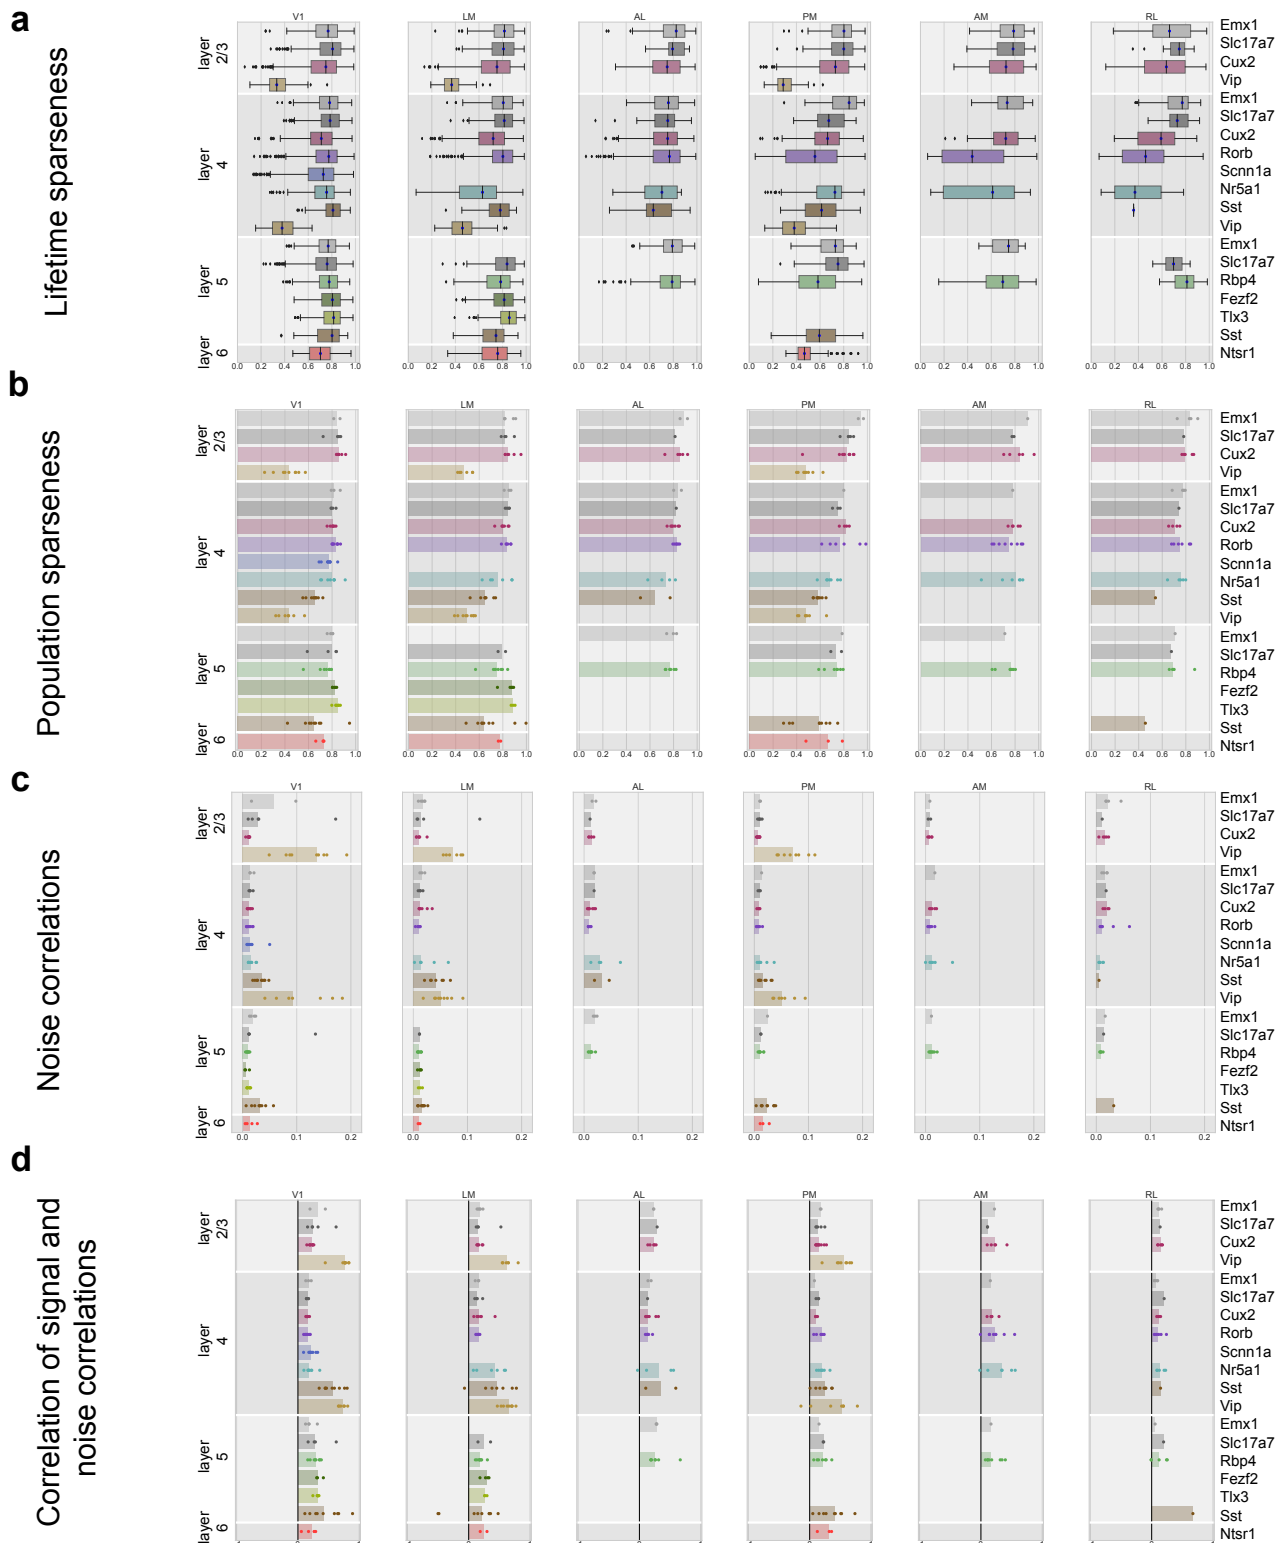

998 **Supplemental Figure 22: Sparsity characterization across all areas**

999 Box or strip plots representing the distribution of values for (a) lifetime sparseness, (b)  
1000 population sparseness, (c) noise correlations and (d) correlation of signal correlations and  
1001 noise correlations for each Cre line and layer across all six visual areas.

1002



1003 **Supplemental Figure 23: Sparsity statistics**

1004 (a) Heatmaps of p-values of pairwise comparisons for each Cre line across areas. For  
1005 single cell metrics (e.g. lifetime sparseness) the Kolmogorov-Smirnov (KS) test was used  
1006 with a Bonferroni correction for the number of comparisons. For population metrics (e.g.  
1007 population sparseness) a t-test was used with a Bonferroni correction for the number of  
1008 comparisons. The heatmap is centered on the significance criteria. E.g. for comparisons  
1009 across all six visual areas,  $p < 0.01$  ( $=0.05/5$ ) is significant. For comparisons across only 3  
1010 visual areas (eg. for Ntsr1)  $p < 0.025$  is significant. (b) Heatmaps of p-values for pairwise  
1011 comparison for each Cre-line and layer combination within each visual area with a  
1012 Bonferroni correction for the number of comparisons. The colormap for the p-values is  
1013 centered at the significance criteria.

1014



# Supplemental Figure 24

## Correlation of signal and noise correlations

Drifting Gratings

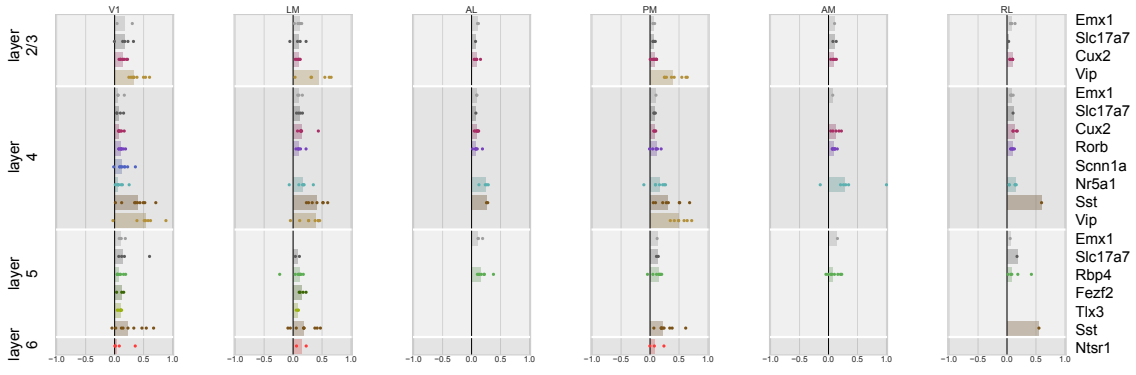

Static Gratings

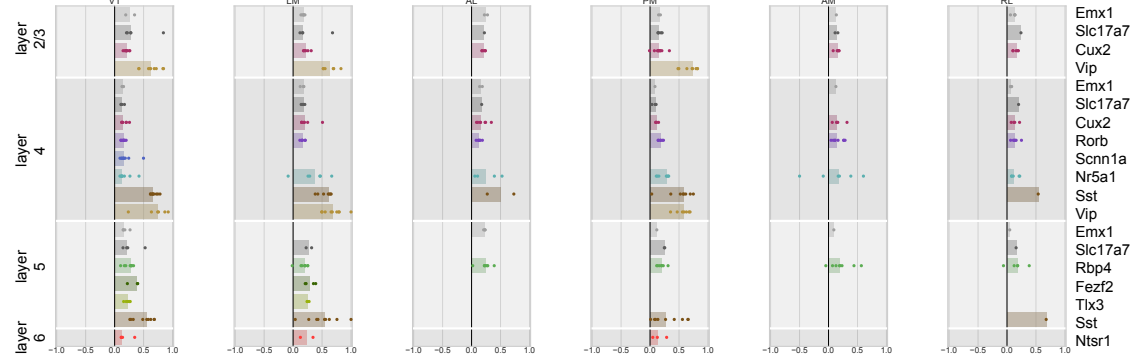

Natural Scenes

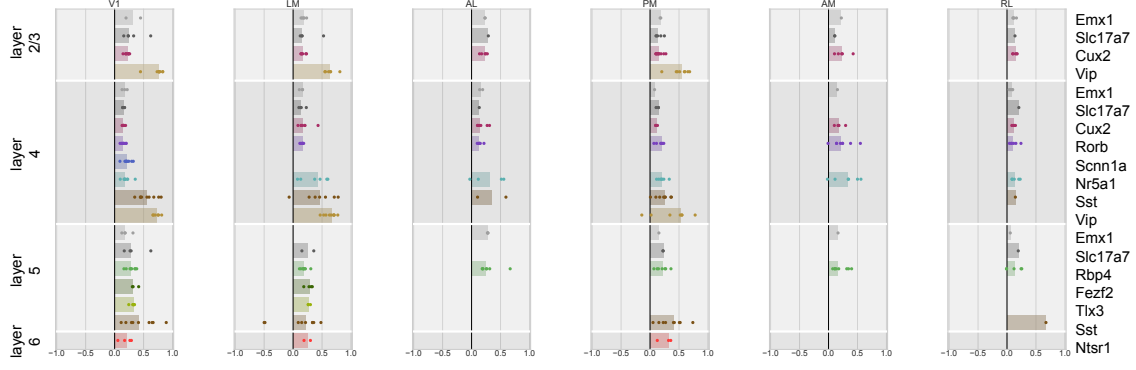

Natural Movie One

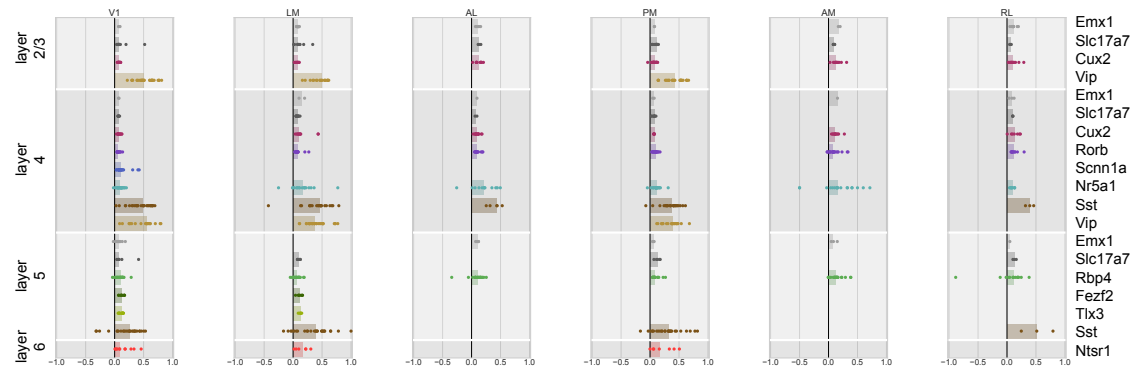

Natural Movie Three

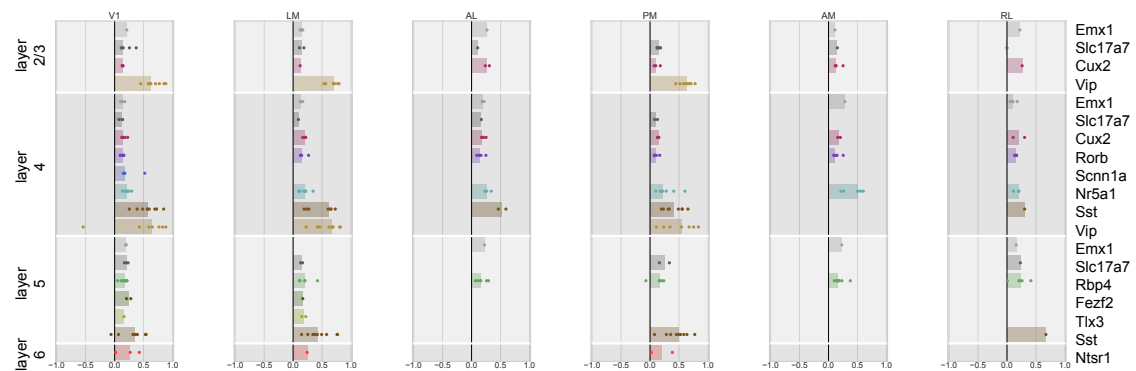

1015 **Supplemental Figure 24: Correlations of signal and noise correlations**  
1016 Strip plots for the correlations of signal and noise correlations for each Cre line and layer  
1017 across all six visual areas, for all stimuli.  
1018

# Supplemental Figure 25

Percent responsive trials  
natural scenes

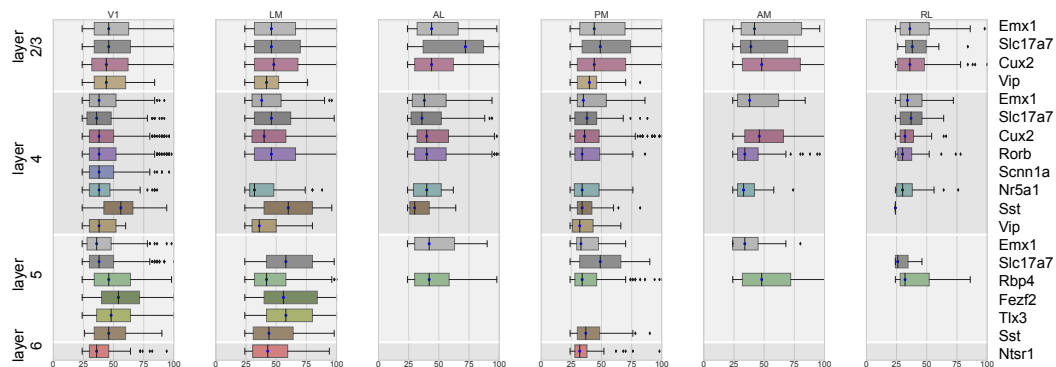

Percent responsive trials  
drifting gratings

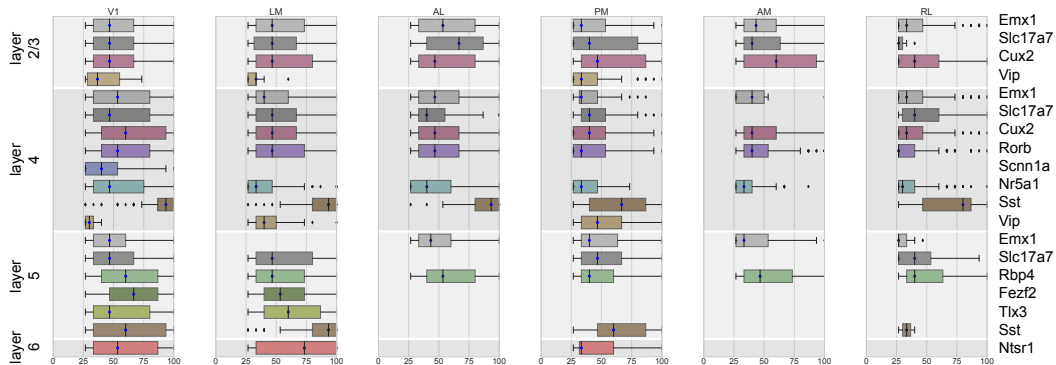

Reliability  
natural scenes

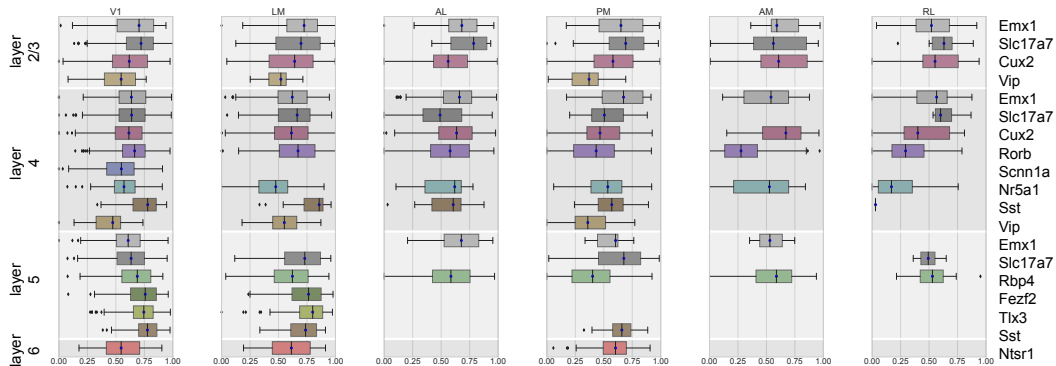

Reliability  
drifting gratings

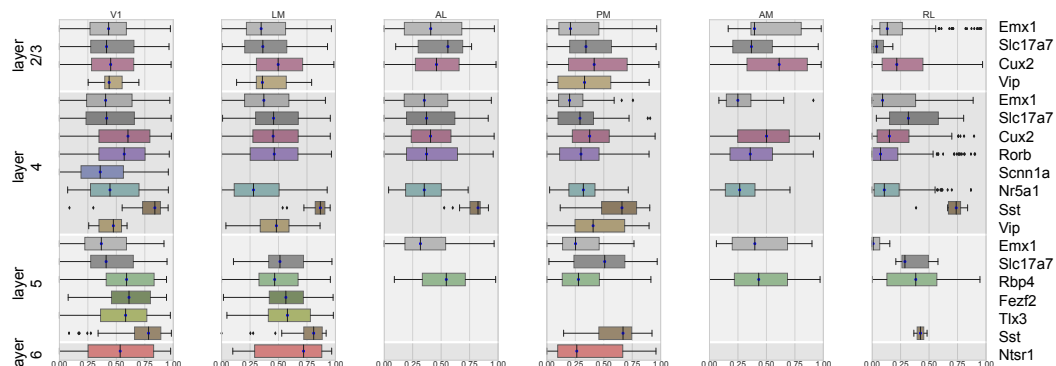

1019 **Supplemental Figure 25: Reliability**

1020 Box plots representing the distribution of values for (a) percent responsive trials for natural  
1021 scenes, (b) percent responsive trials for drifting gratings, (c) reliability for natural scenes  
1022 and (d) reliability for drifting gratings for each Cre line and layer across all six visual areas.

1023

# Supplemental Figure 26

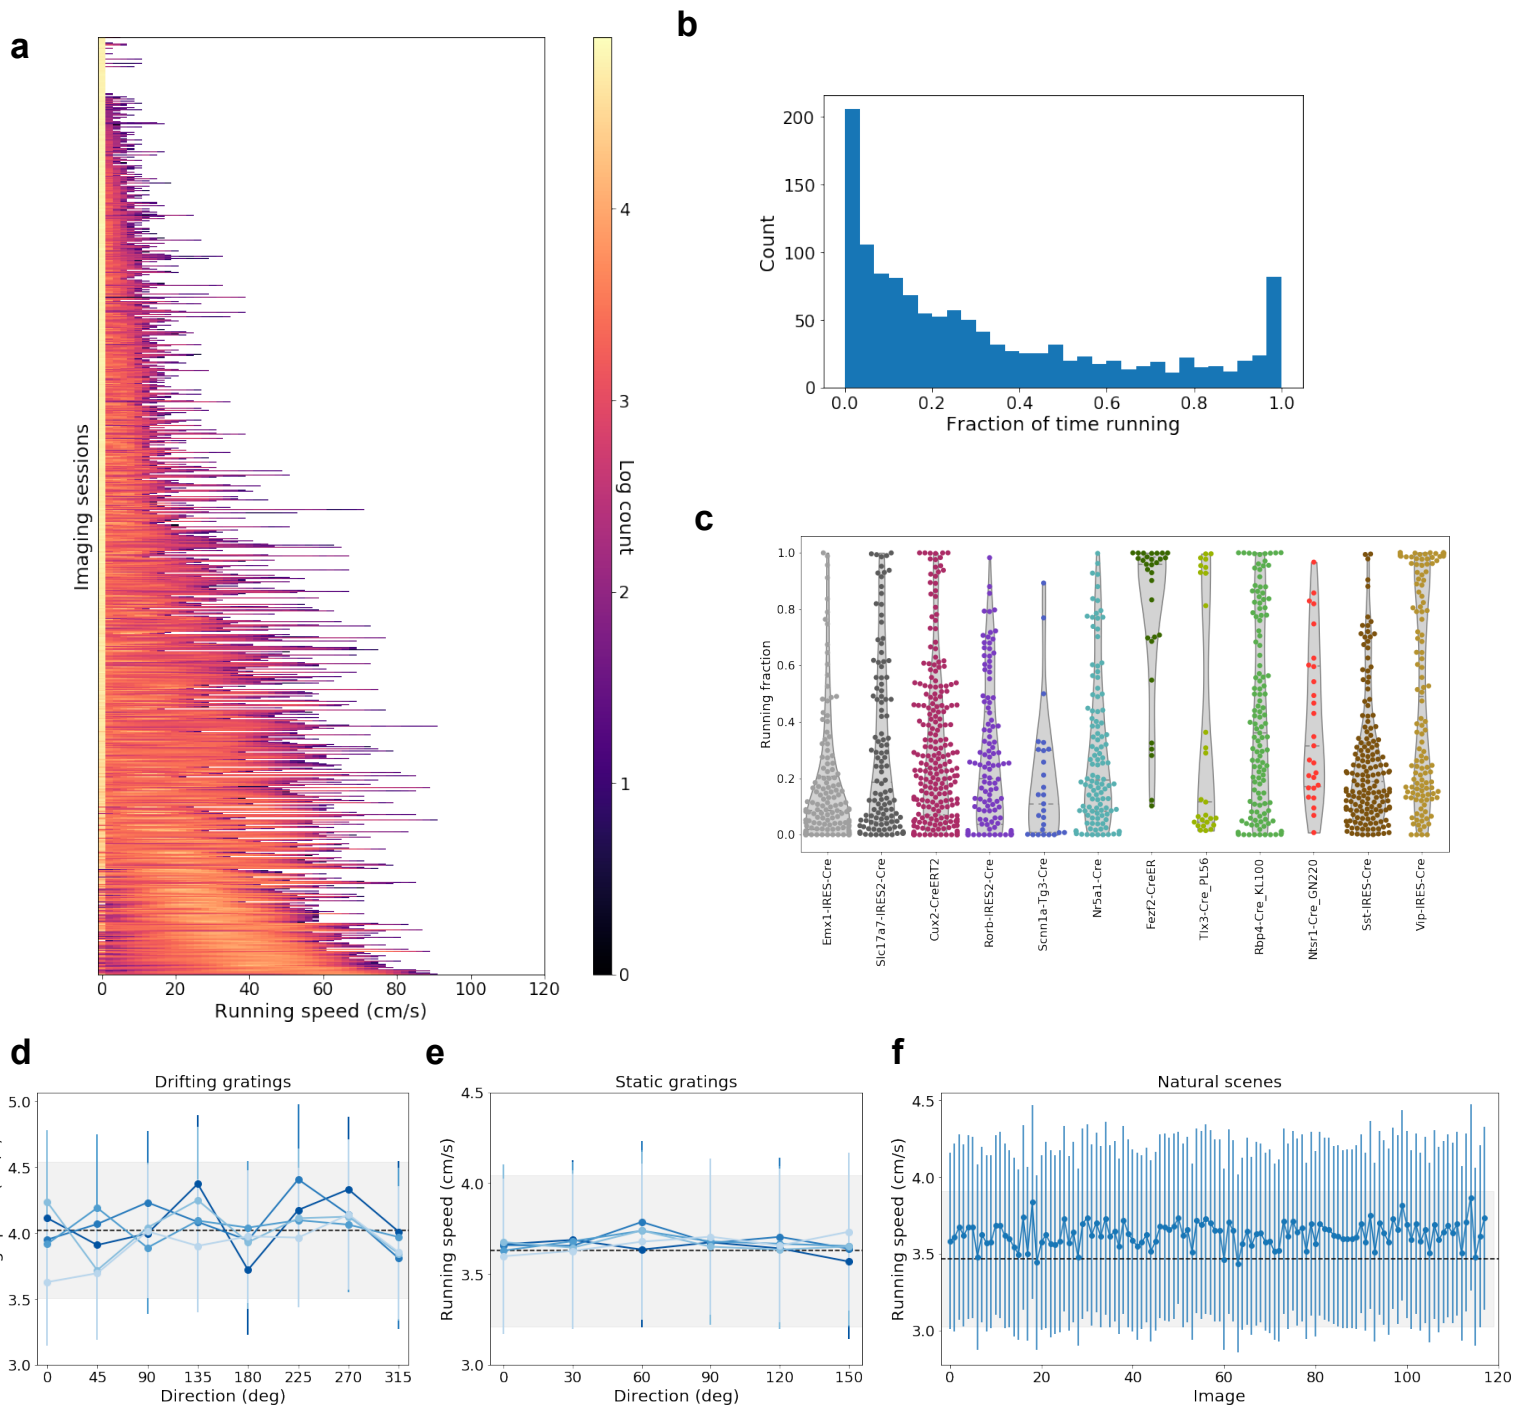

1024 **Supplemental Figure 26: Running characterization**

1025 (a) Heatmap of running speed distributions for all imaging sessions, ordered by the mean  
1026 running speed. (b) Histogram of the fraction of time the mouse is running (>1 cm/s) for all  
1027 imaging sessions. (c) Distribution of the fraction of time the mouse is running for each Cre  
1028 line. Mice from some Cre lines exhibit more running (eg. Fezf2). (d) Mean running speed  
1029 for grating direction for drifting gratings at each temporal frequency, with blank sweep  
1030 indicated by dashed line. (e) Mean running speed for grating orientation for static gratings  
1031 at each spatial frequency, with blank sweep indicated by dashed line. (f) Mean running  
1032 speed for natural scenes.

1033

# Supplemental Figure 27

Model performance

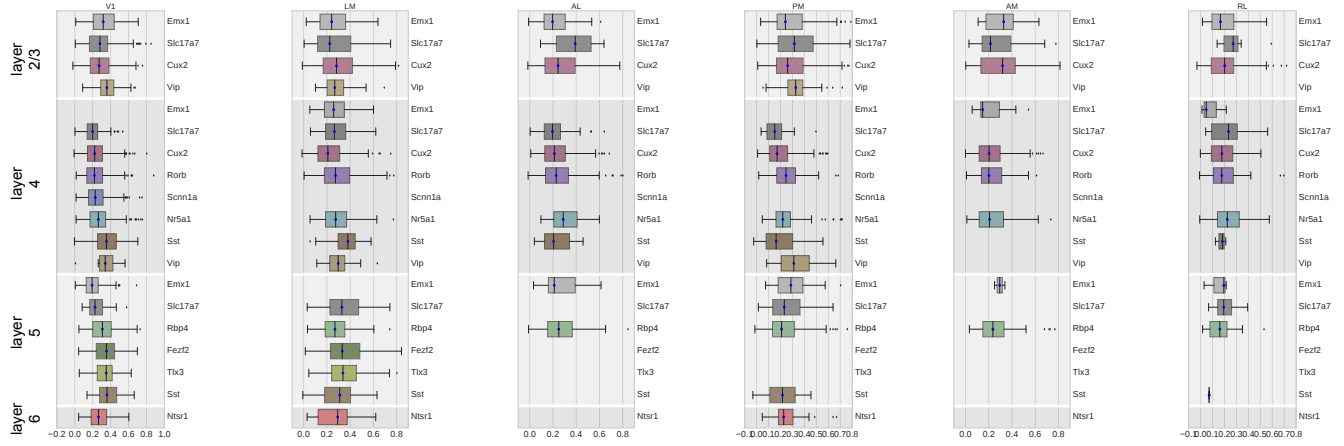

Complexity

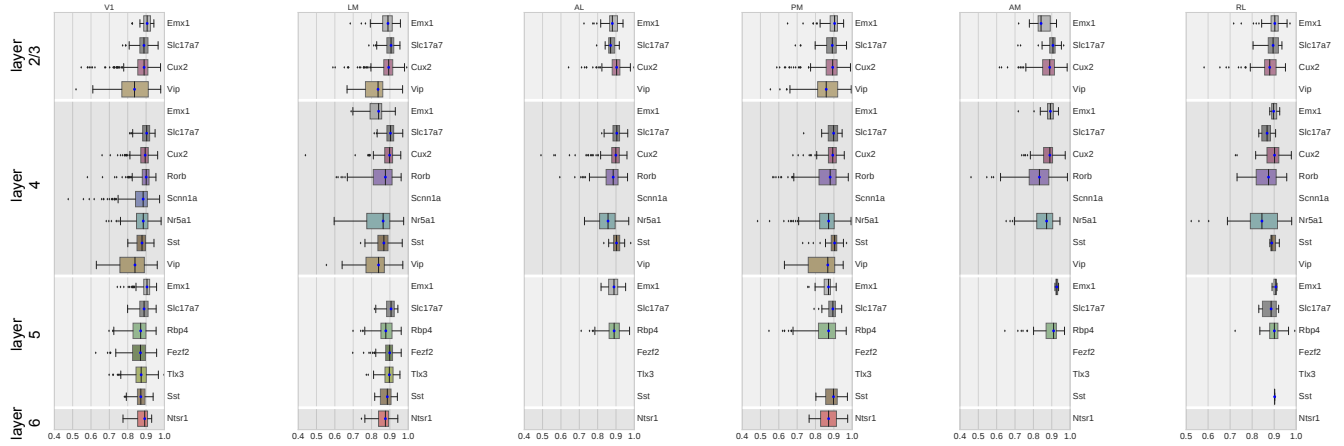

1034 Supplemental Figure 27: Model performance across all areas  
1035 (a) Box plots representing the distribution of model performance ( $r$ ) across all areas. (b)  
1036 Box plots representing the distribution of the complexity ration across all areas.  
1037



# Supplemental Figure 28

## Experiment with overlap ABOVE chance:

SG responsive: 66.9%  
 LSN responsive: 36.4%  
 SG and LSN responsive: 26.4%  
 Chance overlap =  $0.669 \times 0.364 = 24.3\%$   
 Max overlap =  $\min(\text{SG}, \text{LSN}) = 36.4\%$   
 Min overlap =  $(0.669 + 0.364) - 1.0 = 3.3\%$

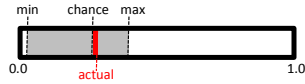

Fraction of cells in experiment

## Experiment with overlap BELOW chance:

SG responsive: 89.5%  
 LSN responsive: 39.2%  
 SG and LSN responsive: 33.6%  
 Chance overlap =  $0.895 \times 0.392 = 35.1\%$   
 Max overlap =  $\min(\text{SG}, \text{LSN}) = 39.2\%$   
 Min overlap =  $(0.895 + 0.392) - 1.0 = 28.7\%$

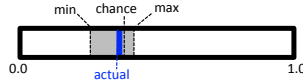

Fraction of cells in experiment

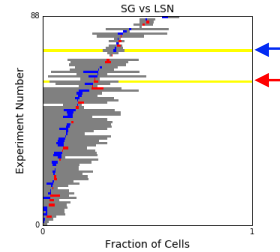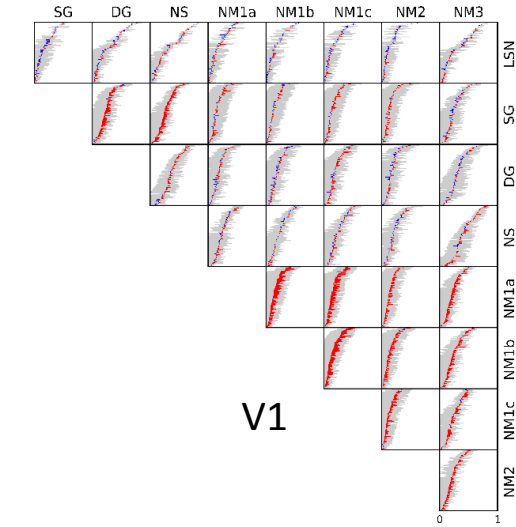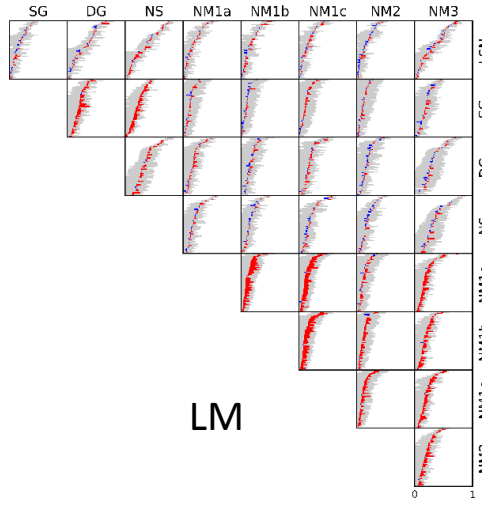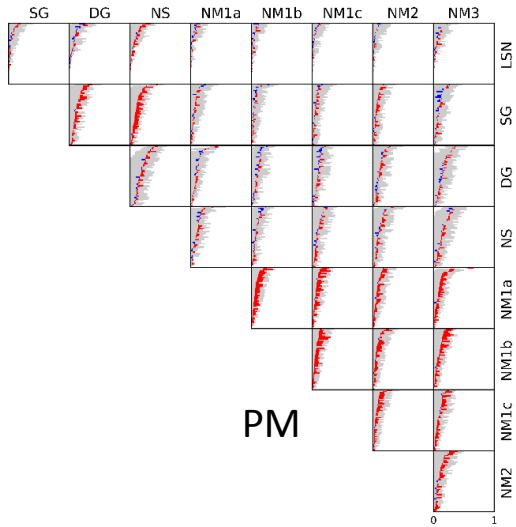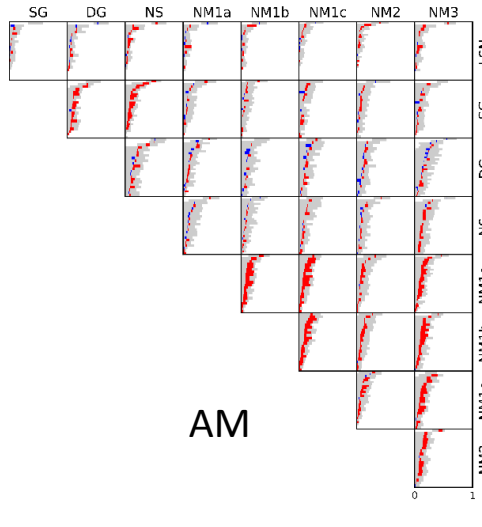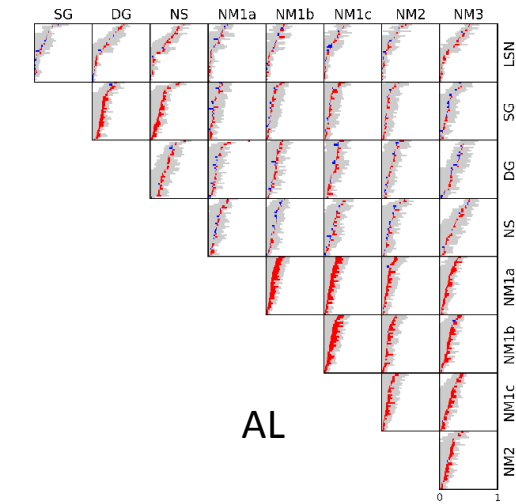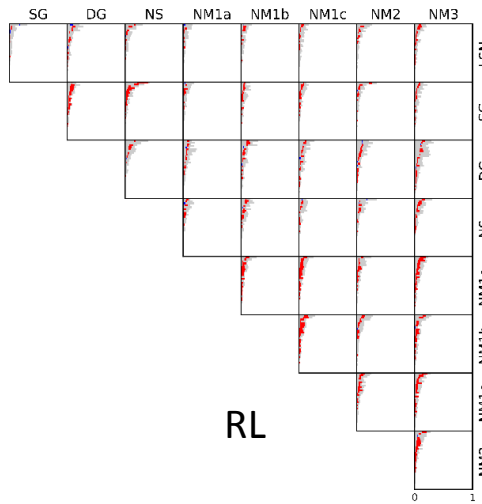

1038 Supplemental Figure 28: Responses to different stimuli are largely  
1039 independent.

1040 For each visual area, the amount of overlap of responsive cells for each pairwise  
1041 comparison of stimuli. Top, comparison of static gratings and locally sparse noise in V1,  
1042 highlighting two examples. For each experiment, the gray bar indicates the range of  
1043 possible overlap given the percent of cells that respond to each stimulus. Colored bar  
1044 indicates the actual overlap relative to chance. Red bar reflects above chance overlap.  
1045 Blue bar reflects below chance overlap. Below, overlap comparisons for each stimulus pair  
1046 for each visual area. Stimulus abbreviations: DG: drifting gratings, SG: static gratings,  
1047 LSN: locally sparse noise, NS: natural scenes, NM: natural movie. Natural movie 1 is  
1048 repeat in each imaging session (NM1a, NM1b, NM1c).  
1049
